# Supplementary material for: Global Gene Transcriptome Analysis in Vaccinated Cattle Revealed a Dominant Role of IL-22 for Protection against Bovine Tuberculosis
Source: PLoS Pathog. 2012 Dec 27;8(12):e1003077. doi: 10.1371/journal.ppat.1003077 (PMC3531513; doi:10.1371/journal.ppat.1003077)
Supplement: Table S1 — List of genes significantly (p<0.05) modulated in vaccinated and protected calves compared to naïve and vaccinated/unprotected animals. PBMC were isolated from prior to M. bovis infection and stimulated with bovine PPD-B. In ‘weighted proportions fold change’ column strength of red colour indicate degree of up-regulated, of green, down-regulated genes. (XLS) [file ppat.1003077.s001.xls]

## Sheet: Sheet1
C+/C-	Feature ID	Range (original values)	IQR (original values)	Difference (original values)	Fold Change (original values)	Range (normalized values)	IQR (normalized values)	Difference (normalized values)	Fold Change (normalized values)	Weighted proportions difference	Weighted proportions fold change	Test statistic	P-value	FDR p-value correction	Expression values	Normalized expression values	Gene name	Submit to KEGG	Transcript ID
C+	IL22.1	1028	266	404.5	810	47.6915	27.2465	24.1442	720.893	2.41442e-05	720.893	2.74649	0.00602374	0.0554979	2	0.134154	IL22	IL22 #9B0000,#FFFFF0	NM_001098379.1
C+	MT3.1	470	82	165	331	21.8045	8.41298	9.35369	194.097	9.35369e-06	194.097	2.17657	0.0295125	0.178749	0	0	MT3	MT3 #9B0000,#FFFFF0	NM_001113304.1
C+	INHBA.1	4257	1549	1566.25	153.805	197.324	159.231	96.8812	119.563	9.68812e-05	119.563	2.03629	0.0417213	0.227016	16	1.07323	INHBA	INHBA #9B0000,#FFFFF0	NM_174363.2
C+	IFNG.1	1230	761	662.25	106.96	56.9456	48.7138	39.9486	83.3653	3.99486e-05	83.3653	5.16322	2.42752e-07	1.06763e-05	7	0.46954	IFNG	IFNG #9B0000,#FFFFF0	NM_174086.1
C+	CCL3.1	31961	14454	15882	70.8878	1490.63	1470.1	1028.65	57.5674	0.00102865	57.5674	3.992	6.55191e-05	0.00142372	103	6.90894	CCL3	CCL3 #9B0000,#FFFFF0	NM_174511.2
C+	RAMP3.1	260	57	100	67.6667	12.0621	5.90925	5.88731	53.0741	5.88731e-06	53.0741	2.73047	0.00632448	0.0579012	2	0.134154	RAMP3	RAMP3 #9B0000,#FFFFF0	NM_001083505.1
C+	LOC100335381.1	4023	1516	2036.25	46.25	186.41	154.337	128.847	35.2211	0.000128847	35.2211	5.26262	1.42028e-07	6.58069e-06	11	0.737848	LOC100335381	LOC100335381 #930000,#FFFFF0	XM_002703923.1
C+	EDN1.1	987	932	820.75	42.0375	63.4033	59.3769	55.1341	32.4979	5.51341e-05	32.4979	11.9893	0	0	0	0	EDN1	EDN1 #9C0000,#FFFFF0	NM_181010.2
C+	IL13.1	73	24	33.5	45.6667	3.38666	1.70952	2.01018	29.6119	2.01018e-06	29.6119	2.74143	0.00611734	0.0562344	0	0	IL13	IL13 #A50000,#FFFFF0	NM_174089.1
C+	RBP4.1	473	446	353.5	31.7391	28.8962	27.513	23.5025	27.0107	2.35025e-05	27.0107	8.19746	2.22045e-16	4.52769e-14	9	0.603694	RBP4	RBP4 #AE0000,#FFFFF0	NM_001040475.2
C+	CDCP1.1	519	194	221.25	29.5484	23.993	20.0584	13.8071	23.6389	1.38071e-05	23.6389	2.85328	0.00432711	0.0428613	9	0.603694	CDCP1	CDCP1 #B80000,#FFFFF0	XM_612363.4
C+	ARHGEF16.1	28	21	18	37	1.49566	1.43403	1.18132	23.5009	1.18132e-06	23.5009	2.08316	0.0372363	0.20965	0	0	ARHGEF16	ARHGEF16 #B90000,#FFFFF0	NM_001101998.1
C+	GJA4.1	59	32	31.25	32.25	2.73716	2.01486	1.93291	22.869	1.93291e-06	22.869	2.66155	0.0077783	0.0672465	0	0	GJA4	GJA4 #BB0000,#FFFFF0	NM_001083738.1
C+	RSAD2.1	18967	4794	7564.75	27.3122	1212.5	335.912	488.704	22.6384	0.000488704	22.6384	2.02746	0.0426154	0.230638	469	31.4592	RSAD2	RSAD2 #BC0000,#FFFFF0	NM_001045941.1
C+	PTPRR (NC_007303 46107983..46357305).2	48	36	24.25	25.25	3.08344	1.62776	1.47964	20.609	1.47964e-06	20.609	2.3175	0.0204768	0.136533	0	0	PTPRR (NC_007303 46107983..46357305)	PTPRR (NC_007303 46107983..46357305) #C20000,#FFFFF0	NM_001015662.1
C+	LIF.1	1189	814	642.5	24.7963	54.8218	51.0671	38.977	19.0565	3.8977e-05	19.0565	4.81173	1.49636e-06	5.3845e-05	50	3.35386	LIF	LIF #C70000,#FFFFF0	NM_173931.1
C+	LOC515676.1	146	116	97.75	22.7222	7.68408	6.31227	6.15217	18.2024	6.15217e-06	18.2024	4.69529	2.66239e-06	8.84353e-05	9	0.603694	LOC515676	LOC515676 #CA0000,#FFFFF0	XM_593741.5
C+	IGFBP3.1	81	44	48.75	25.375	5.20331	3.02517	3.23885	17.7156	3.23885e-06	17.7156	3.40162	0.000669892	0.00950993	0	0	IGFBP3	IGFBP3 #CC0000,#FFFFF0	NM_174556.1
C+	MX2.1	20637	8431	9587.75	22.6917	1324.58	435.203	612.784	17.6629	0.000612784	17.6629	2.60692	0.00913621	0.0761065	390	26.1601	MX2	MX2 #CC0000,#FFFFF0	NM_173941.2
C+	SAA1.1	30058	12729	12873.2	22.1905	1385.56	810.922	737.824	17.2509	0.000737824	17.2509	3.25078	0.00115092	0.0147796	263	17.6413	SAA1	SAA1 #CD0000,#FFFFF0	NM_001075260.1
C+	IL1F7.1	164	75	72.25	23.2308	7.60838	5.36235	4.25584	16.7924	4.25584e-06	16.7924	3.20302	0.00135997	0.0170414	5	0.335386	IL1F7	IL1F7 #CF0000,#FFFFF0	XM_001254155.2
C+	MGC127492.1	29	28	19.75	20.75	2.06543	1.24038	1.25273	15.3333	1.25273e-06	15.3333	2.09698	0.0359953	0.205099	1	0.0670771	MGC127492	MGC127492 #D30000,#FFFFF0	NM_001034503.1
C+	HES4.1	47	45	28	23.4	2.95497	2.10943	1.71326	14.9564	1.71326e-06	14.9564	2.44828	0.0143539	0.1063	0	0	HES4	HES4 #D50000,#FFFFF0	XM_584091.5
C+	TINAGL1.1	430	283	230.25	16.8793	29.7475	19.0135	15.7407	14.6177	1.57407e-05	14.6177	2.85999	0.00423657	0.0421092	7	0.46954	TINAGL1	TINAGL1 #D60000,#FFFFF0	XM_882308.4
C+	CA4.1	79	34	35.5	15.2	5.05031	2.19003	2.33159	13.4991	2.33159e-06	13.4991	2.40654	0.0161044	0.114998	4	0.268308	CA4	CA4 #D90000,#FFFFF0	NM_173897.1
C+	GPR120.1	61	25	32.25	17.125	2.97049	2.54585	2.07602	12.7939	2.07602e-06	12.7939	2.6646	0.00770809	0.0668112	0	0	GPR120	GPR120 #DC0000,#FFFFF0	XM_865266.3
C+	GZMB (NC_007319 34983137..34986882).1	36	27	23.75	20	1.92299	1.67013	1.47581	12.244	1.47581e-06	12.244	2.2387	0.0251754	0.158619	0	0	GZMB (NC_007319 34983137..34986882)	GZMB (NC_007319 34983137..34986882) #DD0000,#FFFFF0	XM_585453.3
C+	LTBP2.1	1006	284	384.25	15.6381	46.1201	29.7559	22.981	12.1274	2.2981e-05	12.1274	2.5583	0.0105186	0.0842947	27	1.81108	LTBP2	LTBP2 #DE0000,#FFFFF0	NM_174385.2
C+	CMPK2.1	3173	1333	1458	14.6262	202.21	59.78	92.9814	12.0334	9.29814e-05	12.0334	2.61021	0.00904877	0.0755761	155	10.397	CMPK2	CMPK2 #DE0000,#FFFFF0	XM_001252650.3
C+	CSF1.1	1160	687	718.75	13.0293	73.4022	51.3037	48.098	11.6426	4.8098e-05	11.6426	5.38712	7.15999e-08	3.56886e-06	126	8.45172	CSF1	CSF1 #DF0000,#FFFFF0	NM_174026.1
C+	SH2D4A.1	61	59	38.75	13.9167	3.87778	2.61006	2.39092	11.3983	2.39092e-06	11.3983	2.83213	0.00462395	0.0448767	5	0.335386	SH2D4A	SH2D4A #E00000,#FFFFF0	XM_582664.5
C+	LOC786204.1	278	185	190.25	12.7077	19.6983	13.8649	12.9862	11.0787	1.29862e-05	11.0787	5.55997	2.69842e-08	1.50895e-06	11	0.737848	LOC786204	LOC786204 #E10000,#FFFFF0	XM_001253061.2
C+	LOC100335333.1	118	44	48.75	13.1875	5.3571	4.68372	3.05417	10.4628	3.05417e-06	10.4628	2.55515	0.0106142	0.0850274	5	0.335386	LOC100335333	LOC100335333 #E30000,#FFFFF0	XM_002704169.1
C+	RPP21.2	52	42	35	11	3.0192	2.28009	2.2271	9.88906	2.2271e-06	9.88906	2.6967	0.00700301	0.0621953	7	0.46954	RPP21	RPP21 #E50000,#FFFFF0	XM_002702857.1
C+	CTGF.1	36	31	20.5	12.7143	2.35032	1.52809	1.30945	9.69944	1.30945e-06	9.69944	2.06367	0.0390489	0.216263	0	0	CTGF	CTGF #E60000,#FFFFF0	NM_174030.2
C+	LOC617696.1	442	170	209.25	12.0132	20.3814	15.1637	12.8716	9.00485	1.28716e-05	9.00485	4.08343	4.43765e-05	0.00102969	6	0.402463	LOC617696	LOC617696 #E80000,#FFFFF0	XM_870004.4
C+	CLDND1.2	241	104	112.25	10.7609	17.1644	11.3123	8.14201	8.91151	8.14201e-06	8.91151	2.29832	0.0215434	0.141522	0	0	CLDND1	CLDND1 #E80000,#FFFFF0	XM_002702382.1
C+	IFIT2.1	3735	1053	1544.25	10.2609	239.028	69.491	98.6125	8.29285	9.86125e-05	8.29285	2.1471	0.0317852	0.187836	235	15.7631	IFIT2	IFIT2 #EA0000,#FFFFF0	XM_001787823.2
C+	RUSC2.1	1107	539	517.25	9.58506	58.4746	46.9268	33.4897	7.94993	3.34897e-05	7.94993	3.0315	0.00243344	0.02723	57	3.8234	RUSC2	RUSC2 #EB0000,#FFFFF0	NM_001082427.1
C+	IFI44.1	5537	1961	2404.25	9.51062	352.192	133.843	152.002	7.87005	0.000152002	7.87005	2.29153	0.0219325	0.143349	505	33.8739	IFI44	IFI44 #EC0000,#FFFFF0	XM_872122.3
C+	LOC616035.1	135	48	56.25	11.7143	6.20094	3.04952	3.15009	7.72864	3.15009e-06	7.72864	3.08215	0.00205515	0.0238159	3	0.201231	LOC616035	LOC616035 #EC0000,#FFFFF0	XM_867996.4
C+	TRPV4.1	139	64	65.75	9.21875	6.42788	4.69124	4.08364	7.08926	4.08364e-06	7.08926	3.50657	0.000453924	0.00695848	1	0.0670771	TRPV4	TRPV4 #EE0000,#FFFFF0	XM_592740.4
C+	MMP13.1	126	50	47.25	8	5.83597	5.35524	2.98195	7.04476	2.98195e-06	7.04476	2.04786	0.040574	0.222452	8	0.536617	MMP13	MMP13 #EE0000,#FFFFF0	NM_174389.2
C+	TGM2.1	517	157	242	8.01449	22.9681	17.1727	14.7891	6.43961	1.47891e-05	6.43961	4.65923	3.17403e-06	0.000102519	51	3.42093	TGM2	TGM2 #F00000,#FFFFF0	NM_177507.2
C+	ANKRD33.1	151	49	61.75	8.05714	6.70871	5.30839	3.76993	6.37714	3.76993e-06	6.37714	2.59766	0.00938621	0.0777478	11	0.737848	ANKRD33	ANKRD33 #F00000,#FFFFF0	XM_001788525.1
C+	PTPRO.1	109	61	60.25	8.30303	4.99101	4.55374	3.79995	6.37488	3.79995e-06	6.37488	3.32833	0.000873674	0.0118607	5	0.335386	PTPRO	PTPRO #F00000,#FFFFF0	XM_614266.5
C+	SPADH1.1	49	25	28.25	8.0625	2.25255	1.7249	1.76513	6.33054	1.76513e-06	6.33054	2.26588	0.023459	0.15077	1	0.0670771	SPADH1	SPADH1 #F00000,#FFFFF0	NM_174616.3
C+	CHGA.1	514	303	244	8.22963	23.2597	18.8022	13.694	6.30978	1.3694e-05	6.30978	3.02202	0.00251092	0.027958	23	1.54277	CHGA	CHGA #F10000,#FFFFF0	NM_181005.2
C+	NTN1.1	49	40	28.5	7	4.74716	1.6094	1.98578	5.9611	1.98578e-06	5.9611	2.17784	0.0294181	0.178391	1	0.0670771	NTN1	NTN1 #F20000,#FFFFF0	XM_601055.5
C+	MFSD2A.1	52	22	28	6.6	2.97049	1.91525	1.82817	5.80801	1.82817e-06	5.80801	2.27254	0.0230539	0.14902	6	0.402463	MFSD2A	MFSD2A #F20000,#FFFFF0	NM_001101959.1
C+	OAS1 (NC_007315 64606768..64614852).1	4639	2739	2601.5	6.94969	290.155	137.845	166.582	5.76168	0.000166582	5.76168	4.20526	2.60785e-05	0.000663867	633	42.4598	OAS1 (NC_007315 64606768..64614852)	OAS1 (NC_007315 64606768..64614852) #F20000,#FFFFF0	NM_001029846.1
C+	ETV3L.1	66	26	28.75	7.05263	2.97717	1.656	1.69187	5.72212	1.69187e-06	5.72212	2.18036	0.0292306	0.177574	5	0.335386	ETV3L	ETV3L #F20000,#FFFFF0	XM_602328.2
C+	C10H11ORF46.1	47	21	26.75	6.63158	2.14333	1.89349	1.6949	5.45929	1.6949e-06	5.45929	2.16343	0.0305082	0.18248	5	0.335386	C10H11ORF46	C10H11ORF46 #F30000,#FFFFF0	NM_001078061.1
C+	GPR31.1	112	35	44	6.86667	5.06886	2.52592	2.41385	5.15781	2.41385e-06	5.15781	2.55332	0.0106703	0.0853074	8	0.536617	GPR31	GPR31 #F40000,#FFFFF0	XM_869537.1
C+	ITGB3.1	5407	2158	2454.75	6.14353	232.288	188.212	149.803	4.8746	0.000149803	4.8746	3.40237	0.000668054	0.00949719	545	36.557	ITGB3	ITGB3 #F50000,#FFFFF0	XM_616376.3
C+	PROKR2.1	51	33	31.5	5.84615	2.40507	2.24062	1.99946	4.84963	1.99946e-06	4.84963	2.2942	0.0217788	0.142604	7	0.46954	PROKR2	PROKR2 #F50000,#FFFFF0	NM_174640.1
C+	CD300LF.1	46	41	31.5	6.25	3.28863	1.61833	1.95215	4.79756	1.95215e-06	4.79756	2.26161	0.0237217	0.152007	3	0.201231	CD300LF	CD300LF #F50000,#FFFFF0	XM_001788959.2
C+	CENPN (NC_007316 6753458..6772985).1	78	54	49.25	6.32432	3.80791	3.102	2.93561	4.7913	2.93561e-06	4.7913	2.77259	0.00556121	0.0519744	8	0.536617	CENPN (NC_007316 6753458..6772985)	CENPN (NC_007316 6753458..6772985) #F50000,#FFFFF0	NM_001038099.1
C+	TNFAIP2 (NC_007319 68062503..68075109).1	2484	773	1111.5	5.86433	113.205	83.601	68.4073	4.75449	6.84073e-05	4.75449	4.09731	4.17982e-05	0.000985724	281	18.8487	TNFAIP2 (NC_007319 68062503..68075109)	TNFAIP2 (NC_007319 68062503..68075109) #F60000,#FFFFF0	XM_614791.5
C+	SLCO4A1.1	1224	423	488.5	6.30978	54.9504	47.0342	29.375	4.74881	2.9375e-05	4.74881	2.47512	0.013319	0.10109	64	4.29294	SLCO4A1	SLCO4A1 #F60000,#FFFFF0	XM_611249.5
C+	OAS1 (NC_007315 64590633..64597337).1	3625	976	1486	5.58642	231.765	76.922	97.7342	4.71714	9.77342e-05	4.71714	2.31958	0.0203636	0.136074	562	37.6973	OAS1 (NC_007315 64590633..64597337)	OAS1 (NC_007315 64590633..64597337) #F60000,#FFFFF0	NM_178108.2
C+	LOC516658.1	66	35	33.75	5.5	4.10086	2.46607	2.17719	4.61372	2.17719e-06	4.61372	2.36772	0.0178979	0.12416	3	0.201231	LOC516658	LOC516658 #F60000,#FFFFF0	XM_594815.3
C+	FFAR2.1	133	87	80.75	5.19481	7.21809	5.42076	5.18953	4.5031	5.18953e-06	4.5031	3.63511	0.000277863	0.00476569	37	2.48185	FFAR2	FFAR2 #F60000,#FFFFF0	NM_001163784.1
C+	APBB2.1	103	18	36.5	5.42424	4.66121	1.50363	2.06203	4.43415	2.06203e-06	4.43415	2.28309	0.0224253	0.145656	16	1.07323	APBB2	APBB2 #F70000,#FFFFF0	NM_001076847.1
C+	BRP44.4	270	148	137.25	6.08333	17.3444	10.2388	8.55315	4.41612	8.55315e-06	4.41612	2.72278	0.00647351	0.0588917	0	0	BRP44	BRP44 #F70000,#FFFFF0	XM_002703771.1
C+	ZNFX1.1	25188	13803	13449.2	5.38479	1555.43	651.883	840.456	4.39672	0.000840456	4.39672	3.60928	0.000307051	0.00512692	3830	256.905	ZNFX1	ZNFX1 #F70000,#FFFFF0	XM_589621.4
C+	MYO10 (NC_007318 59685413..59876548).1	185	70	66.25	5.41667	8.4792	7.32053	4.01054	4.3348	4.01054e-06	4.3348	1.96322	0.0496206	0.257468	5	0.335386	MYO10 (NC_007318 59685413..59876548)	MYO10 (NC_007318 59685413..59876548) #F70000,#FFFFF0	NM_174394.2
C+	IL1RL1.1	108	33	43.25	5.67568	4.75619	2.64599	2.48505	4.33023	2.48505e-06	4.33023	2.49208	0.0126997	0.0972568	14	0.93908	IL1RL1	IL1RL1 #F70000,#FFFFF0	XM_871776.3
C+	P2RX7.1	130	66	72.25	5.18841	5.64973	4.13542	4.39613	4.275	4.39613e-06	4.275	3.30416	0.000952633	0.0127104	25	1.67693	P2RX7	P2RX7 #F70000,#FFFFF0	XM_591410.2
C+	SCN9A.1	56	48	43.75	5.06977	5.44382	3.15942	2.93676	4.20982	2.93676e-06	4.20982	2.69026	0.00713971	0.0631039	12	0.804925	SCN9A	SCN9A #F70000,#FFFFF0	NM_001110787.1
C+	PYCR1.1	357	140	176.25	5.43396	15.8796	9.83585	10.3873	4.13748	1.03873e-05	4.13748	5.03731	4.72122e-07	1.9293e-05	33	2.21354	PYCR1	PYCR1 #F80000,#FFFFF0	NM_001014957.1
C+	CYP1B1.1	1220	616	696.75	4.99284	60.9817	48.2374	43.7285	4.13101	4.37285e-05	4.13101	7.70231	1.33227e-14	2.13448e-12	114	7.64679	CYP1B1	CYP1B1 #F80000,#FFFFF0	XM_588813.5
C+	TNFRSF18.1	829	213	325.5	5.44369	37.6734	17.4432	18.4578	4.10625	1.84578e-05	4.10625	3.12791	0.00176054	0.0210719	38	2.54893	TNFRSF18	TNFRSF18 #F80000,#FFFFF0	XM_594408.4
C+	GUK1.1	96	65	49	4.01538	5.07483	3.71749	3.16848	3.87049	3.16848e-06	3.87049	2.41626	0.015681	0.113091	51	3.42093	GUK1	GUK1 #F80000,#FFFFF0	NM_174078.3
C+	SECTM1 (NC_007317 51930106..51933664).1	272	91	117.5	4.64341	19.3765	9.84068	8.09461	3.85468	8.09461e-06	3.85468	2.04854	0.0405072	0.222206	23	1.54277	SECTM1 (NC_007317 51930106..51933664)	SECTM1 (NC_007317 51930106..51933664) #F80000,#FFFFF0	NM_001102326.1
C+	LOC786194.1	276	200	135.25	4.03933	24.8824	13.662	10.4835	3.85287	1.04835e-05	3.85287	1.97553	0.0482077	0.252312	82	5.50032	LOC786194	LOC786194 #F90000,#FFFFF0	XM_001253952.1
C+	MRPL16.1	367	299	217.75	4.90583	19.5264	14.0383	12.502	3.80095	1.2502e-05	3.80095	3.77799	0.000158104	0.00299548	46	3.08555	MRPL16	MRPL16 #F90000,#FFFFF0	NM_001034641.1
C+	TNFRSF12A.1	85	21	34	4.88571	3.85863	2.35448	1.99758	3.79427	1.99758e-06	3.79427	2.15802	0.0309263	0.184216	9	0.603694	TNFRSF12A	TNFRSF12A #F90000,#FFFFF0	XM_869699.3
C+	LOC786362.1	118	103	83.75	4.76404	8.17616	5.24993	5.08072	3.76122	5.08072e-06	3.76122	3.43309	0.000596746	0.00869784	19	1.27447	LOC786362	LOC786362 #F90000,#FFFFF0	XM_001253358.1
C+	SYNJ2.1	650	279	310.75	4.47207	32.1367	24.4458	19.3844	3.68873	1.93844e-05	3.68873	3.50222	0.000461404	0.007051	85	5.70156	SYNJ2	SYNJ2 #F90000,#FFFFF0	XM_596626.5
C+	LOC521214.1	54	37	35.75	4.4878	4.52194	2.27852	2.32551	3.67132	2.32551e-06	3.67132	2.30639	0.0210887	0.139306	12	0.804925	LOC521214	LOC521214 #F90000,#FFFFF0	XM_599474.5
C+	BAK1.1	962	321	450.25	4.63105	41.7487	28.5666	26.8402	3.66902	2.68402e-05	3.66902	5.27088	1.35773e-07	6.3299e-06	107	7.17725	BAK1	BAK1 #F90000,#FFFFF0	NM_001077918.1
C+	LOC100336125.1	134	83	68	4.72603	6.14417	4.72379	3.80997	3.62873	3.80997e-06	3.62873	2.94194	0.00326165	0.0342414	8	0.536617	LOC100336125	LOC100336125 #F90000,#FFFFF0	XM_002703392.1
C+	ERLEC1.1	282	257	139.5	3.98396	20.0891	16.2854	9.84841	3.617	9.84841e-06	3.617	2.1353	0.0327363	0.192051	57	3.8234	ERLEC1	ERLEC1 #F90000,#FFFFF0	XM_001249692.3
C+	CDKN1C.1	173	87	83.75	4.35	7.83268	6.64619	5.12942	3.61508	5.12942e-06	3.61508	3.40972	0.000650302	0.00932362	16	1.07323	CDKN1C	CDKN1C #F90000,#FFFFF0	NM_001077903.1
C+	DCTPP1.1	253	119	128.75	4.67857	11.2202	6.2584	7.50569	3.61147	7.50569e-06	3.61147	4.12335	3.73407e-05	0.000900594	25	1.67693	DCTPP1	DCTPP1 #F90000,#FFFFF0	NM_001038202.1
C+	USP18.1	1962	1013	891.5	4.45208	121.279	43.6676	54.3555	3.60289	5.43555e-05	3.60289	2.45772	0.0139823	0.104658	337	22.605	USP18	USP18 #F90000,#FFFFF0	NM_001017940.1
C+	PDE1B.1	323	142	164.25	4.3866	13.1679	9.85117	9.61886	3.5208	9.61886e-06	3.5208	4.63187	3.62393e-06	0.000114486	57	3.8234	PDE1B	PDE1B #FA0000,#FFFFF0	NM_174415.2
C+	AGRN.1	468	195	204.25	4.71364	20.9915	12.1194	11.6026	3.49706	1.16026e-05	3.49706	3.84636	0.000119887	0.00237503	58	3.89047	AGRN	AGRN #FA0000,#FFFFF0	XM_604151.5
C+	TNFRSF4.1	909	266	360.5	4.48309	40.1796	15.4533	20.1464	3.46267	2.01464e-05	3.46267	3.5406	0.000399221	0.00627166	102	6.84187	TNFRSF4	TNFRSF4 #FA0000,#FFFFF0	NM_001099043.1
C+	TMEM40.1	110	56	65	4.20988	6.4435	4.06042	4.0807	3.43447	4.0807e-06	3.43447	2.9935	0.00275797	0.0300214	22	1.4757	TMEM40	TMEM40 #FA0000,#FFFFF0	XM_581782.5
C+	TH.1	166	61	61.75	4.25	8.1467	5.67886	3.73812	3.43163	3.73812e-06	3.43163	2.07558	0.0379333	0.21212	17	1.14031	TH	TH #FA0000,#FFFFF0	NM_173884.2
C+	TM6SF2.1	46	34	28	3.94737	2.66962	2.42372	1.8285	3.39571	1.8285e-06	3.39571	1.99655	0.0458743	0.244001	11	0.737848	TM6SF2	TM6SF2 #FA0000,#FFFFF0	XM_593991.5
C+	SOBP.1	575	355	280.25	4.07967	27.7886	18.9858	16.2862	3.37374	1.62862e-05	3.37374	3.66307	0.000249209	0.00435944	143	9.59203	SOBP	SOBP #FA0000,#FFFFF0	NM_001101170.2
C+	HES6.1	217	146	112.75	3.96711	19.5098	6.44664	7.49687	3.35697	7.49687e-06	3.35697	2.03088	0.042267	0.229479	26	1.74401	HES6	HES6 #FA0000,#FFFFF0	NM_001075949.1
C+	PLEKHN1.1	106	47	51.75	4.04412	5.78236	3.7015	3.21042	3.29323	3.21042e-06	3.29323	2.61905	0.00881761	0.0741671	10	0.670771	PLEKHN1	PLEKHN1 #FA0000,#FFFFF0	XM_598312.2
C+	IFITM3.1	7884	5401	4203.25	4.14968	412.292	257.719	248.222	3.23838	0.000248222	3.23838	3.91544	9.02417e-05	0.00186459	1179	79.0839	IFITM3	IFITM3 #FA0000,#FFFFF0	XM_598998.1
C+	RHBDF1.1	127	61	68	3.80412	7.81901	3.83573	4.29428	3.20129	4.29428e-06	3.20129	3.00002	0.00269966	0.0296123	20	1.34154	RHBDF1	RHBDF1 #FB0000,#FFFFF0	NM_001105400.1
C+	EPS8.1	174	73	75.25	3.86667	8.26263	7.00507	4.6251	3.1928	4.6251e-06	3.1928	2.32681	0.0199753	0.134145	36	2.41478	EPS8	EPS8 #FB0000,#FFFFF0	NM_001076102.1
C+	IRF4.1	2370	752	1082	4.11367	124.073	77.3144	65.1322	3.17329	6.51322e-05	3.17329	2.91428	0.00356507	0.0369256	137	9.18957	IRF4	IRF4 #FB0000,#FFFFF0	XM_865312.3
C+	MCM2 (NC_007320 61869238..61885529).1	2302	815	1168.5	4.02329	125.033	76.1025	70.879	3.14777	7.0879e-05	3.14777	3.86793	0.000109766	0.00220313	225	15.0924	MCM2 (NC_007320 61869238..61885529)	MCM2 (NC_007320 61869238..61885529) #FB0000,#FFFFF0	XM_864352.4
C+	SLC17A9.1	1050	494	508	3.92374	44.4331	32.1855	29.759	3.14097	2.9759e-05	3.14097	5.87709	4.17559e-09	2.71912e-07	182	12.208	SLC17A9	SLC17A9 #FB0000,#FFFFF0	NM_001100378.1
C+	NAV3.1	939	514	492	4.02304	42.0258	35.3618	29.4182	3.1319	2.94182e-05	3.1319	4.16783	3.07519e-05	0.000762639	137	9.18957	NAV3	NAV3 #FB0000,#FFFFF0	XM_607306.4
C+	SPC24.1	107	47	60.25	4.0125	6.77131	3.60596	3.69073	3.10953	3.69073e-06	3.10953	2.75286	0.00590778	0.0545814	9	0.603694	SPC24	SPC24 #FB0000,#FFFFF0	NM_001075391.1
C+	PROKR1.1	122	48	65.75	3.95506	6.20746	4.29898	3.97644	3.10667	3.97644e-06	3.10667	2.85648	0.00428364	0.0424933	18	1.20739	PROKR1	PROKR1 #FB0000,#FFFFF0	NM_174330.1
C+	SLFN11.1	1059	790	688.5	3.73214	62.0917	42.8113	42.6152	3.08118	4.26152e-05	3.08118	6.02896	1.65035e-09	1.13318e-07	281	18.8487	SLFN11	SLFN11 #FB0000,#FFFFF0	XM_600064.2
C+	UBE2C.1	146	115	98.25	3.82734	9.21584	5.08443	5.9838	3.07886	5.9838e-06	3.07886	3.49272	0.000478136	0.00725179	24	1.60985	UBE2C	UBE2C #FB0000,#FFFFF0	NM_001037449.1
C+	LOC512149.1	321	171	177.5	3.56318	23.7917	14.8952	11.7947	3.06857	1.17947e-05	3.06857	2.59458	0.0094707	0.0783224	116	7.78095	LOC512149	LOC512149 #FB0000,#FFFFF0	XM_589599.5
C+	LOC515917.1	114	66	62	3.43137	8.92599	3.08586	4.11178	3.06022	4.11178e-06	3.06022	2.83944	0.00451923	0.0440364	12	0.804925	LOC515917	LOC515917 #FB0000,#FFFFF0	XM_611595.4
C+	COX7A1.1	371	266	188.25	3.71841	22.4465	10.4788	11.0123	3.05367	1.10123e-05	3.05367	3.02549	0.00248231	0.0276547	90	6.03694	COX7A1	COX7A1 #FB0000,#FFFFF0	NM_176674.2
C+	LOC784535.1	71	50	35.5	3.89796	4.53254	1.81099	2.06992	3.03869	2.06992e-06	3.03869	2.04438	0.0409156	0.223899	10	0.670771	LOC784535	LOC784535 #FB0000,#FFFFF0	XM_001252806.2
C+	IL18BP.1	428	112	157.5	3.90323	18.585	10.7394	8.81695	3.03558	8.81695e-06	3.03558	2.49358	0.0126461	0.0969196	46	3.08555	IL18BP	IL18BP #FB0000,#FFFFF0	XM_869739.3
C+	SUV420H2.1	775	165	284.5	3.95584	34.2172	17.6652	15.9495	3.03297	1.59495e-05	3.03297	2.69412	0.00705743	0.0625135	91	6.10402	SUV420H2	SUV420H2 #FB0000,#FFFFF0	XM_598002.3
C+	SLC7A5.1	2129	690	946.5	3.84662	94.5501	44.3537	53.8386	2.96622	5.38386e-05	2.96622	4.46743	7.91655e-06	0.000231611	204	13.6837	SLC7A5	SLC7A5 #FB0000,#FFFFF0	NM_174613.2
C+	REC8.1	159	130	96	3.70423	8.861	5.02476	5.64823	2.94921	5.64823e-06	2.94921	3.33935	0.000839748	0.0114929	24	1.60985	REC8	REC8 #FB0000,#FFFFF0	XM_001787867.2
C+	P2RY14.1	205	87	86.5	3.70312	12.6797	3.92573	4.98293	2.91993	4.98293e-06	2.91993	2.09269	0.0363773	0.206299	19	1.27447	P2RY14	P2RY14 #FC0000,#FFFFF0	NM_001077009.1
C+	RRAS.1	220	91	111	3.65868	9.62719	6.86242	6.55102	2.9184	6.55102e-06	2.9184	3.5818	0.000341237	0.00553297	28	1.87816	RRAS	RRAS #FC0000,#FFFFF0	NM_001038688.1
C+	MPP7.1	681	294	323.25	3.68257	27.7837	19.131	18.1491	2.90136	1.81491e-05	2.90136	5.17173	2.31945e-07	1.02457e-05	148	9.92741	MPP7	MPP7 #FC0000,#FFFFF0	NM_001100347.1
C+	UHRF1.1	1017	681	620	3.56198	52.8091	39.6638	37.6548	2.89057	3.76548e-05	2.89057	7.19129	6.41931e-13	8.25392e-11	180	12.0739	UHRF1	UHRF1 #FC0000,#FFFFF0	NM_001103098.1
C+	CDT1.1	416	118	195	3.76596	18.9651	13.9135	11.3567	2.88832	1.13567e-05	2.88832	3.78171	0.000155753	0.00296341	41	2.75016	CDT1	CDT1 #FC0000,#FFFFF0	XM_597224.4
C+	LAG3.1	4792	3106	2911.75	3.6173	221.938	156.07	171.348	2.88236	0.000171348	2.88236	10.3562	0	0	879	58.9608	LAG3	LAG3 #FC0000,#FFFFF0	XM_593126.5
C+	SAMD9.1	13424	5954	6380.25	3.49814	831.807	438.639	386.483	2.87811	0.000386483	2.87811	2.6274	0.00860391	0.0727943	3519	236.044	SAMD9	SAMD9 #FC0000,#FFFFF0	XM_592017.5
C+	CDC25A.1	123	69	70.75	3.69524	6.59798	3.23363	4.12566	2.85661	4.12566e-06	2.85661	2.81861	0.00482319	0.0464764	11	0.737848	CDC25A	CDC25A #FC0000,#FFFFF0	NM_001101100.1
C+	CDCA8.1	123	77	72.25	3.65138	5.72752	4.06769	4.19715	2.85517	4.19715e-06	2.85517	2.84236	0.00447812	0.0438196	19	1.27447	CDCA8	CDCA8 #FC0000,#FFFFF0	NM_001083652.1
C+	ZNF382.1	64	23	31.25	3.15517	4.55819	2.51547	2.09465	2.85233	2.09465e-06	2.85233	2.00717	0.0447319	0.239476	19	1.27447	ZNF382	ZNF382 #FC0000,#FFFFF0	XM_002701861.1
C+	TRAF4.1	995	315	414.5	3.57453	43.4491	23.511	23.67	2.80709	2.367e-05	2.80709	3.63826	0.000274484	0.00472379	134	8.98833	TRAF4	TRAF4 #FC0000,#FFFFF0	NM_001101280.1
C+	TREX1.1	998	670	481.75	3.53553	49.5948	28.874	27.1264	2.77262	2.71264e-05	2.77262	3.66262	0.000249653	0.00436342	160	10.7323	TREX1	TREX1 #FC0000,#FFFFF0	NM_174475.3
C+	ADAR.1	6699	5991	4536.5	3.38669	393.355	264.514	270.724	2.74989	0.000270724	2.74989	7.36827	1.72973e-13	2.35932e-11	2210	148.24	ADAR	ADAR #FC0000,#FFFFF0	XM_581374.5
C+	CCM2.1	4525	2402	2498	3.37002	207.601	134.087	149.498	2.74966	0.000149498	2.74966	8.98448	0	0	1091	73.1811	CCM2	CCM2 #FC0000,#FFFFF0	XM_873401.4
C+	LOC513032.1	273	73	115.75	3.53005	12.0666	8.73882	6.71239	2.74438	6.71239e-06	2.74438	3.02892	0.00245434	0.0274037	30	2.01231	LOC513032	LOC513032 #FC0000,#FFFFF0	XM_590649.3
C+	HJURP.1	62	40	37	3.27692	4.46548	2.60574	2.32429	2.71761	2.32429e-06	2.71761	2.07256	0.0382134	0.212804	12	0.804925	HJURP	HJURP #FC0000,#FFFFF0	XM_869720.4
C+	ESPL1.1	298	141	165.5	3.41606	15.5605	9.98911	9.88972	2.7121	9.88972e-06	2.7121	4.07543	4.59301e-05	0.00105844	49	3.28678	ESPL1	ESPL1 #FC0000,#FFFFF0	XM_001790117.1
C+	FAM54A.1	76	44	43	3.35616	4.00158	3.20836	2.58833	2.70904	2.58833e-06	2.70904	2.18417	0.02895	0.176481	18	1.20739	FAM54A	FAM54A #FC0000,#FFFFF0	NM_001017948.2
C+	FLT3LG.1	860	383	446	3.39785	33.8642	25.1095	25.7864	2.70492	2.57864e-05	2.70492	6.88961	5.59486e-12	6.13823e-10	193	12.9459	FLT3LG	FLT3LG #FC0000,#FFFFF0	NM_181030.2
C+	CDC20.1	139	70	77.75	3.3209	7.88736	4.2126	4.73542	2.70407	4.73542e-06	2.70407	2.95199	0.00315735	0.0333704	24	1.60985	CDC20	CDC20 #FC0000,#FFFFF0	NM_001082436.1
C+	LOC100335358.1	716	204	299	3.45082	33.2975	23.815	17.358	2.69548	1.7358e-05	2.69548	2.84301	0.00446899	0.0437515	99	6.64063	LOC100335358	LOC100335358 #FC0000,#FFFFF0	XM_002684332.1
C+	TMEM170B.1	71	50	41.25	2.98795	5.72254	2.59056	2.7255	2.6814	2.7255e-06	2.6814	2.23143	0.0256529	0.160877	17	1.14031	TMEM170B	TMEM170B #FC0000,#FFFFF0	XM_867185.3
C+	IFRD2.1	1330	412	544	3.41242	57.8043	25.5258	30.4265	2.66984	3.04265e-05	2.66984	3.75601	0.000172648	0.00320042	167	11.2019	IFRD2	IFRD2 #FC0000,#FFFFF0	NM_001077012.1
C+	CENPT.1	144	80	88.25	3.35333	9.6258	5.12005	5.36735	2.6679	5.36735e-06	2.6679	3.12455	0.00178077	0.0212555	26	1.74401	CENPT	CENPT #FC0000,#FFFFF0	NM_001101969.1
C+	METTL1.1	564	234	294	3.34731	23.8311	19.7686	17.1785	2.66375	1.71785e-05	2.66375	5.5861	2.32232e-08	1.31687e-06	112	7.51264	METTL1	METTL1 #FC0000,#FFFFF0	NM_001046077.1
C+	LGALS9.2	6790	5842	3822.5	3.47291	411.559	220.222	209.121	2.65789	0.000209121	2.65789	3.0536	0.00226112	0.0256434	1731	116.11	LGALS9	LGALS9 #FC0000,#FFFFF0	NM_001039177.2
C+	RAB20.1	717	265	305.25	3.24449	31.484	20.8894	17.8343	2.65558	1.78343e-05	2.65558	3.68465	0.000229018	0.00404473	111	7.44556	RAB20	RAB20 #FC0000,#FFFFF0	XM_867651.3
C+	CCNB2.1	95	40	49	3.41975	4.44713	2.53032	2.8423	2.65304	2.8423e-06	2.65304	2.26819	0.0233174	0.15029	7	0.46954	CCNB2	CCNB2 #FC0000,#FFFFF0	NM_174264.3
C+	CXCR5.1	118	27	43.5	3.63636	5.32654	1.73757	2.27098	2.63492	2.27098e-06	2.63492	2.02134	0.0432451	0.233232	24	1.60985	CXCR5	CXCR5 #FC0000,#FFFFF0	NM_001011675.1
C+	ZNF593.1	169	78	77.5	3.38462	7.13263	3.58386	4.31299	2.61979	4.31299e-06	2.61979	2.77849	0.00546131	0.0513018	23	1.54277	ZNF593	ZNF593 #FC0000,#FFFFF0	XM_585257.4
C+	DOCK6.1	111	43	54.5	3.22449	6.42599	3.55096	3.2963	2.61714	3.2963e-06	2.61714	2.42793	0.0151854	0.110747	23	1.54277	DOCK6	DOCK6 #FD0000,#FFFFF0	XM_584740.4
C+	LOC100336106.1	86	64	53.25	3.24211	4.04029	2.857	3.11816	2.6129	3.11816e-06	2.6129	2.35969	0.01829	0.125842	25	1.67693	LOC100336106	LOC100336106 #FD0000,#FFFFF0	XM_002684461.1
C+	MYBL1.1	153	90	74	3.14493	7.15511	4.84758	4.33696	2.59336	4.33696e-06	2.59336	2.77352	0.0055454	0.0519226	46	3.08555	MYBL1	MYBL1 #FD0000,#FFFFF0	NM_176635.3
C+	MRPL2.1	209	112	110.5	3.22111	9.4789	5.97991	6.30746	2.58617	6.30746e-06	2.58617	3.34055	0.000836124	0.0114666	72	4.82955	MRPL2	MRPL2 #FD0000,#FFFFF0	XM_001790518.1
C+	PRF1.1	3205	816	1286	3.27008	142.757	99.8841	73.6767	2.57441	7.36767e-05	2.57441	2.84629	0.00442322	0.0434721	535	35.8863	PRF1	PRF1 #FD0000,#FFFFF0	NM_001143735.1
C+	CLCN3.2	67	49	42	2.76842	7.01879	2.55917	2.95098	2.5702	2.95098e-06	2.5702	2.1697	0.0300295	0.180579	16	1.07323	CLCN3	CLCN3 #FD0000,#FFFFF0	XM_865211.1
C+	ORC1L.1	231	168	148.25	3.24621	13.5928	7.32314	8.66731	2.56727	8.66731e-06	2.56727	3.90282	9.50803e-05	0.0019427	49	3.28678	ORC1L	ORC1L #FD0000,#FFFFF0	NM_001014918.1
C+	GADD45G.1	236	49	79.75	3.26241	10.1013	5.06496	4.27649	2.55479	4.27649e-06	2.55479	2.18245	0.0290761	0.176977	29	1.94524	GADD45G	GADD45G #FD0000,#FFFFF0	NM_001045901.1
C+	DUSP4.1	349	111	127	3.15254	15.3991	10.9912	7.31689	2.53138	7.31689e-06	2.53138	2.15863	0.0308788	0.183992	42	2.81724	DUSP4	DUSP4 #FD0000,#FFFFF0	XM_593654.4
C+	BRI3BP.1	123	51	56.5	3.19417	5.19478	2.69362	3.21554	2.52002	3.21554e-06	2.52002	2.35673	0.0184367	0.126451	18	1.20739	BRI3BP	BRI3BP #FD0000,#FFFFF0	NM_001099087.1
C+	SPAG5.1	199	122	116.5	3.13761	11.2402	7.84948	6.95433	2.51974	6.95433e-06	2.51974	3.46569	0.000528884	0.0078321	34	2.28062	SPAG5	SPAG5 #FD0000,#FFFFF0	XM_580731.4
C+	KIF18B.1	102	34	52.25	3.24731	5.43971	2.66376	3.03271	2.51192	3.03271e-06	2.51192	2.28244	0.0224635	0.145858	9	0.603694	KIF18B	KIF18B #FD0000,#FFFFF0	XM_588453.4
C+	PPIF.1	334	112	136	3.27615	14.3936	5.23507	7.37309	2.50724	7.37309e-06	2.50724	3.51257	0.000443797	0.00683366	54	3.62216	PPIF	PPIF #FD0000,#FFFFF0	NM_001001597.1
C+	RHBDF2.1	5161	1749	2274.5	3.12421	217.571	133.269	130.316	2.50644	0.000130316	2.50644	4.49699	6.89229e-06	0.000204309	958	64.2599	RHBDF2	RHBDF2 #FD0000,#FFFFF0	XM_596084.4
C+	FLT3.1	119	63	58.75	2.97479	8.05282	2.91525	3.5934	2.49983	3.5934e-06	2.49983	2.38147	0.0172439	0.120743	39	2.61601	FLT3	FLT3 #FD0000,#FFFFF0	XM_590263.5
C+	MYBBP1A.1	3833	1189	1736.25	3.13956	161.511	106.953	99.5649	2.49118	9.95649e-05	2.49118	4.33307	1.47046e-05	0.00040133	678	45.4783	MYBBP1A	MYBBP1A #FD0000,#FFFFF0	XM_590665.5
C+	SF3B4.1	974	378	366.75	3.20602	41.4157	23.8535	19.0323	2.48287	1.90323e-05	2.48287	2.52582	0.011543	0.0904862	151	10.1286	SF3B4	SF3B4 #FD0000,#FFFFF0	XM_582525.3
C+	IFI35.1	2104	1866	1267.5	3.06854	118.007	72.5836	72.1979	2.48146	7.21979e-05	2.48146	4.75735	1.96154e-06	6.88656e-05	656	44.0026	IFI35	IFI35 #FD0000,#FFFFF0	NM_001075462.1
C+	BCL2L12.1	630	520	358.25	3.142	37.6012	15.8451	20.1665	2.47754	2.01665e-05	2.47754	3.85221	0.00011706	0.00233047	161	10.7994	BCL2L12	BCL2L12 #FD0000,#FFFFF0	NM_001101148.1
C+	PIGC.1	80	49	45.75	2.92632	4.56838	3.56625	2.78656	2.46411	2.78656e-06	2.46411	2.17048	0.0299706	0.180424	27	1.81108	PIGC	PIGC #FD0000,#FFFFF0	NM_001034383.1
C+	PSMF1.1	1929	1348	997.5	3.05353	113.111	50.5401	56.1547	2.45132	5.61547e-05	2.45132	3.07624	0.00209631	0.024265	580	38.9047	PSMF1	PSMF1 #FD0000,#FFFFF0	NM_001076478.1
C+	HLA-A.1	7401	4720	3866.5	3.07848	321.691	210.693	217.398	2.44972	0.000217398	2.44972	5.20016	1.99117e-07	8.95229e-06	1412	94.7129	HLA-A	HLA-A #FD0000,#FFFFF0	NM_001040554.1
C+	SLC19A1.1	489	137	185.25	3.13545	21.3302	6.5547	9.98984	2.44597	9.98984e-06	2.44597	3.25289	0.00114239	0.0147056	75	5.03078	SLC19A1	SLC19A1 #FD0000,#FFFFF0	NM_001076453.1
C+	MYBL2.1	733	247	383.25	3.11157	42.4345	20.6601	22.4677	2.44453	2.24677e-05	2.44453	3.41025	0.000649026	0.00931193	108	7.24433	MYBL2	MYBL2 #FD0000,#FFFFF0	NM_001075448.1
C+	IKZF4.1	260	111	117.5	2.98312	11.1596	9.05101	6.86183	2.43642	6.86183e-06	2.43642	3.05414	0.00225706	0.0256261	52	3.48801	IKZF4	IKZF4 #FD0000,#FFFFF0	XM_612597.4
C+	PSMB2.1	2825	1545	1506.25	3.03754	102.165	93.5355	85.4185	2.43568	8.54185e-05	2.43568	11.2391	0	0	885	59.3633	PSMB2	PSMB2 #FD0000,#FFFFF0	NM_001015615.1
C+	RBCK1.1	6591	3523	3246.5	3.0473	267.685	161.783	183.775	2.42831	0.000183775	2.42831	6.09827	1.0723e-09	7.59525e-08	1411	94.6458	RBCK1	RBCK1 #FD0000,#FFFFF0	NM_001075161.1
C+	LY6E.1	9814	7959	5267.75	3.02606	594.683	267.932	292.787	2.40979	0.000292787	2.40979	3.42944	0.000604834	0.0087651	3022	202.707	LY6E	LY6E #FD0000,#FFFFF0	NM_001046070.1
C+	KCP.1	731	172	260.75	3.0451	32.2606	14.9561	14.3337	2.40815	1.43337e-05	2.40815	2.38502	0.0170783	0.119799	61	4.0917	KCP	KCP #FD0000,#FFFFF0	XM_593676.5
C+	EIF2AK2.1	2307	812	1004.75	2.90836	140.91	45.5011	59.0854	2.40298	5.90854e-05	2.40298	2.40818	0.0160322	0.114563	771	51.7165	EIF2AK2	EIF2AK2 #FD0000,#FFFFF0	NM_178109.2
C+	MGC137708.1	211	36	85	3.1118	9.32279	4.71968	4.7133	2.38266	4.7133e-06	2.38266	2.37368	0.0176118	0.122765	17	1.14031	MGC137708	MGC137708 #FD0000,#FFFFF0	NM_001046227.1
C+	TRMT61A.1	529	110	198.5	3.1694	23.4825	9.09102	10.6305	2.37881	1.06305e-05	2.37881	2.50007	0.0124169	0.0954166	47	3.15262	TRMT61A	TRMT61A #FD0000,#FFFFF0	NM_001098927.1
C+	CKB.1	1681	783	782.75	2.97539	70.9691	37.905	43.695	2.37709	4.3695e-05	2.37709	4.44045	8.97716e-06	0.000255602	254	17.0376	CKB	CKB #FD0000,#FFFFF0	NM_001015613.1
C+	HMGA1.1	2993	1286	1298.75	2.99118	124.194	59.0491	71.2925	2.3637	7.12925e-05	2.3637	4.28723	1.80913e-05	0.000479907	497	33.3373	HMGA1	HMGA1 #FD0000,#FFFFF0	NM_001076523.1
C+	NFKBIB.1	1842	758	728.75	3.00896	79.1847	35.526	39.3677	2.36265	3.93677e-05	2.36265	3.20079	0.00137051	0.0171522	277	18.5804	NFKBIB	NFKBIB #FD0000,#FFFFF0	NM_001075872.1
C+	BCL2.1	592	152	219.5	3.01839	27.6636	17.1534	12.3951	2.3621	1.23951e-05	2.3621	2.13693	0.0326035	0.191494	76	5.09786	BCL2	BCL2 #FD0000,#FFFFF0	NM_001166486.1
C+	BCL6.1	1194	781	774	2.85834	60.0284	50.3042	46.061	2.35974	4.6061e-05	2.35974	8.29354	0	0	492	33.0019	BCL6	BCL6 #FD0000,#FFFFF0	XM_584289.4
C+	TNFSF14.1	1469	398	537.25	2.84622	62.0279	51.3775	31.0516	2.35891	3.10516e-05	2.35891	2.15355	0.0312756	0.185694	387	25.9588	TNFSF14	TNFSF14 #FD0000,#FFFFF0	NM_001101855.1
C+	CEP55.1	54	48	40.75	2.89535	3.56486	2.73512	2.4145	2.35392	2.4145e-06	2.35392	1.97453	0.0483211	0.252644	21	1.40862	CEP55	CEP55 #FD0000,#FFFFF0	XM_591294.4
C+	STAT5A.1	9157	4060	4510	2.91487	376.221	262.436	259.058	2.35295	0.000259058	2.35295	6.12346	9.1572e-10	6.53203e-08	2261	151.661	STAT5A	STAT5A #FD0000,#FFFFF0	NM_001012673.1
C+	CCND2.1	2076	485	831.25	2.9994	88.7272	54.6228	46.1053	2.33904	4.61053e-05	2.33904	3.0201	0.00252688	0.0281048	346	23.2087	CCND2	CCND2 #FD0000,#FFFFF0	NM_001076372.1
C+	ASPDH.1	368	105	142.25	2.94198	16.0133	8.40616	7.92324	2.33748	7.92324e-06	2.33748	2.71434	0.00664072	0.0598732	44	2.95139	ASPDH	ASPDH #FD0000,#FFFFF0	XM_613471.5
C+	NACAD.1	149	49	64.5	2.92537	7.13627	5.14146	3.71977	2.32817	3.71977e-06	2.32817	2.43676	0.0148194	0.108745	33	2.21354	NACAD	NACAD #FD0000,#FFFFF0	XM_609695.5
C+	RELB.1	3106	1538	1461.75	2.9027	125.384	76.0498	81.8567	2.31842	8.18567e-05	2.31842	5.19536	2.04328e-07	9.12561e-06	622	41.722	RELB	RELB #FD0000,#FFFFF0	XM_600955.5
C+	PPP1R3D.1	371	117	163.5	2.86325	17.4548	10.2055	9.4373	2.31527	9.4373e-06	2.31527	3.44597	0.000569009	0.00834174	78	5.23202	PPP1R3D	PPP1R3D #FD0000,#FFFFF0	XM_001250296.2
C+	RECQL4.1	248	71	105	2.85022	11.1174	6.08668	6.02962	2.31309	6.02962e-06	2.31309	2.65984	0.00781788	0.0675308	33	2.21354	RECQL4	RECQL4 #FD0000,#FFFFF0	NM_001098037.1
C+	CASP1.1	187	91	83	2.79459	11.2066	5.21416	4.85126	2.31027	4.85126e-06	2.31027	2.15564	0.0311121	0.184996	35	2.3477	CASP1	CASP1 #FD0000,#FFFFF0	XM_592026.4
C+	DDX19B.1	1747	951	914.25	2.85635	63.1311	55.0497	51.7614	2.30781	5.17614e-05	2.30781	9.04796	0	0	532	35.685	DDX19B	DDX19B #FE0000,#FFFFF0	NM_001046230.1
C+	ESCO2.1	100	58	53	2.84348	6.76944	3.49514	3.05037	2.29679	3.05037e-06	2.29679	2.18238	0.0290819	0.176977	18	1.20739	ESCO2	ESCO2 #FE0000,#FFFFF0	NM_001101182.1
C+	SLC29A1.1	447	306	238	2.91165	24.094	13.514	13.1433	2.28833	1.31433e-05	2.28833	4.21051	2.54802e-05	0.000650277	91	6.10402	SLC29A1	SLC29A1 #FE0000,#FFFFF0	NM_001034398.1
C+	CHAF1B.1	444	278	267	2.81324	21.0928	14.5387	15.3868	2.28573	1.53868e-05	2.28573	4.9076	9.22019e-07	3.47253e-05	123	8.25049	CHAF1B	CHAF1B #FE0000,#FFFFF0	NM_001098014.1
C+	NFKB2.1	8517	4154	4010.75	2.86373	345.5	198.193	223.679	2.27734	0.000223679	2.27734	4.84984	1.23561e-06	4.5187e-05	1668	111.885	NFKB2	NFKB2 #FE0000,#FFFFF0	NM_001102101.1
C+	TBRG4.1	1839	646	792.25	2.88071	75.4867	34.4672	43.5294	2.27489	4.35294e-05	2.27489	4.88751	1.02119e-06	3.81755e-05	411	27.5687	TBRG4	TBRG4 #FE0000,#FFFFF0	NM_001076967.1
C+	NOL6.1	757	347	419	2.79443	36.2644	22.8296	24.4009	2.27183	2.44009e-05	2.27183	6.02003	1.74393e-09	1.19338e-07	229	15.3607	NOL6	NOL6 #FE0000,#FFFFF0	NM_001099185.1
C+	FUT4.1	721	190	267.5	2.84801	30.7799	19.0812	14.8915	2.27098	1.48915e-05	2.27098	2.43241	0.0149989	0.109744	102	6.84187	FUT4	FUT4 #FE0000,#FFFFF0	NM_174736.2
C+	C2.1	4799	2209	2168.75	2.69136	280.357	150.181	127.747	2.26954	0.000127747	2.26954	2.56826	0.0102212	0.082666	1768	118.592	C2	C2 #FE0000,#FFFFF0	NM_001034492.1
C+	GRHPR.1	433	188	195.75	2.8777	17.9329	13.4558	10.9024	2.26479	1.09024e-05	2.26479	3.63468	0.000278328	0.00476962	108	7.24433	GRHPR	GRHPR #FE0000,#FFFFF0	XM_580934.4
C+	TRAF2.1	2820	663	1039.5	2.87045	122.989	62.0542	57.0673	2.26376	5.70673e-05	2.26376	2.49555	0.0125762	0.0964939	381	25.5564	TRAF2	TRAF2 #FE0000,#FFFFF0	XM_869007.3
C+	DLL1.1	237	146	125.75	2.86989	10.6302	7.47567	7.05732	2.26233	7.05732e-06	2.26233	3.30503	0.000949675	0.0126793	57	3.8234	DLL1	DLL1 #FE0000,#FFFFF0	XM_001255728.1
C+	DNPEP.1	1945	723	885.25	2.87851	79.9807	40.8557	48.8815	2.25821	4.88815e-05	2.25821	4.6762	2.92248e-06	9.57729e-05	387	25.9588	DNPEP	DNPEP #FE0000,#FFFFF0	NM_001045952.1
C+	NCF4.1	1451	764	745.75	2.80569	59.5361	39.1715	41.7644	2.24984	4.17644e-05	2.24984	6.73825	1.60316e-11	1.6101e-09	329	22.0684	NCF4	NCF4 #FE0000,#FFFFF0	NM_001045983.1
C+	SBNO2.1	10841	2861	4639.5	2.80736	456.761	258.165	261.82	2.24903	0.00026182	2.24903	3.60218	0.000315565	0.00522585	2049	137.441	SBNO2	SBNO2 #FE0000,#FFFFF0	NM_001077911.1
C+	CCDC86.1	516	243	255	2.78634	18.7295	14.9062	14.1281	2.24762	1.41281e-05	2.24762	4.65945	3.17064e-06	0.000102519	180	12.0739	CCDC86	CCDC86 #FE0000,#FFFFF0	NM_001038574.1
C+	CARS.1	2163	1447	1153.5	2.77462	92.2666	61.1844	65.1864	2.24286	6.51864e-05	2.24286	6.52464	6.8167e-11	6.03547e-09	618	41.4537	CARS	CARS #FE0000,#FFFFF0	NM_001103249.1
C+	PIM2.1	2202	1750	1355.25	2.74141	119.003	98.9949	76.2356	2.23757	7.62356e-05	2.23757	4.29877	1.71753e-05	0.000459229	910	61.0402	PIM2	PIM2 #FE0000,#FFFFF0	XM_585196.4
C+	SLC6A9 (NC_007301 108919381..108939713).1	1213	469	590	2.79195	45.5976	39.7345	33.1335	2.23617	3.31335e-05	2.23617	6.92263	4.43379e-12	5.0855e-10	388	26.0259	SLC6A9 (NC_007301 108919381..108939713)	SLC6A9 (NC_007301 108919381..108939713) #FE0000,#FFFFF0	NM_174612.2
C+	CIRH1A.1	588	324	350.25	2.68795	25.344	20.3614	20.4007	2.22858	2.04007e-05	2.22858	5.57257	2.51018e-08	1.41545e-06	268	17.9767	CIRH1A	CIRH1A #FE0000,#FFFFF0	XM_587444.3
C+	DTYMK.1	433	100	162.5	2.83099	18.7746	7.44314	8.81257	2.22814	8.81257e-06	2.22814	2.77922	0.00544895	0.0512374	56	3.75632	DTYMK	DTYMK #FE0000,#FFFFF0	NM_001098893.1
C+	PML.1	6964	3705	3098.5	2.75155	304.879	157.465	174.343	2.22492	0.000174343	2.22492	3.48668	0.000489053	0.00737856	1877	125.904	PML	PML #FE0000,#FFFFF0	XM_001788358.2
C+	LGALS3BP.1	6879	4863	3734.25	2.76581	316.556	209.516	207.389	2.22484	0.000207389	2.22484	6.05023	1.44645e-09	1.00342e-07	2154	144.484	LGALS3BP	LGALS3BP #FE0000,#FFFFF0	NM_001046316.1
C+	ATG4D.1	2557	676	1059.75	2.8162	111.558	75.4283	59.3218	2.22355	5.93218e-05	2.22355	2.8816	0.00395658	0.0399847	461	30.9226	ATG4D	ATG4D #FE0000,#FFFFF0	NM_001099146.1
C+	CD97.1	11819	6312	6705.75	2.66914	542.205	355.54	392.788	2.21933	0.000392788	2.21933	8.98794	0	0	4196	281.456	CD97	CD97 #FE0000,#FFFFF0	NM_176661.1
C+	MED12L.1	95	76	62.75	2.60897	7.28472	4.22343	3.84615	2.21845	3.84615e-06	2.21845	2.41337	0.0158056	0.113669	51	3.42093	MED12L	MED12L #FE0000,#FFFFF0	XM_584077.4
C+	ZMIZ2.2	4472	1567	2170	2.79896	199.761	111.061	122.348	2.21777	0.000122348	2.21777	4.21495	2.49833e-05	0.000640837	864	57.9546	ZMIZ2	ZMIZ2 #FE0000,#FFFFF0	XM_002704109.1
C+	BATF.1	917	240	328.75	2.78184	40.1694	16.9709	17.7544	2.20643	1.77544e-05	2.20643	2.3748	0.0175586	0.122445	98	6.57356	BATF	BATF #FE0000,#FFFFF0	XM_869926.2
C+	LOC515679.1	98	78	71.5	2.71257	6.48847	4.95421	4.21575	2.19822	4.21575e-06	2.19822	2.51352	0.0119533	0.0927415	44	2.95139	LOC515679	LOC515679 #FE0000,#FFFFF0	XM_593744.3
C+	LPIN2.1	4993	1791	2530.75	2.62124	263.207	137.139	149.494	2.18888	0.000149494	2.18888	4.44627	8.73769e-06	0.000250907	1724	115.641	LPIN2	LPIN2 #FE0000,#FFFFF0	XM_592307.3
C+	CKS1B.1	99	54	52.5	2.79487	4.72059	2.68443	2.89149	2.18508	2.89149e-06	2.18508	2.07446	0.0380363	0.212345	22	1.4757	CKS1B	CKS1B #FE0000,#FFFFF0	NM_001113311.1
C+	APRT.1	2896	1283	1347.5	2.69337	122.205	64.4273	76.1386	2.18304	7.61386e-05	2.18304	4.89331	9.91584e-07	3.71375e-05	773	51.8506	APRT	APRT #FE0000,#FFFFF0	NM_001025334.2
C+	JAG1.1	4096	1536	1674.25	2.73139	167.569	83.084	90.8732	2.1762	9.08732e-05	2.1762	3.93643	8.2703e-05	0.00174454	1365	91.5603	JAG1	JAG1 #FE0000,#FFFFF0	XM_001251494.3
C+	FARSA.1	1140	419	507	2.71864	45.4309	24.1783	27.9811	2.17508	2.79811e-05	2.17508	5.22585	1.73361e-07	7.91775e-06	277	18.5804	FARSA	FARSA #FE0000,#FFFFF0	NM_001101107.1
C+	MTP18.1	572	221	252.75	2.76748	23.4861	8.70559	13.7273	2.17495	1.37273e-05	2.17495	3.77753	0.00015839	0.00299665	119	7.98218	MTP18	MTP18 #FE0000,#FFFFF0	NM_001075863.1
C+	EXOSC4.1	513	116	179.25	2.88189	22.2742	4.22408	9.14282	2.17115	9.14282e-06	2.17115	2.33749	0.0194136	0.131422	53	3.55509	EXOSC4	EXOSC4 #FE0000,#FFFFF0	NM_001078086.1
C+	LOC509113.1	1195	495	505.5	2.69347	49.6348	24.0308	27.7055	2.17091	2.77055e-05	2.17091	4.33281	1.47221e-05	0.00040133	291	19.5194	LOC509113	LOC509113 #FE0000,#FFFFF0	XM_586006.5
C+	CHTF18.1	172	58	71.5	2.68235	7.59821	2.84705	4.0043	2.16689	4.0043e-06	2.16689	2.26682	0.0234014	0.150684	35	2.3477	CHTF18	CHTF18 #FE0000,#FFFFF0	XM_595170.4
C+	LOC529196.1	402	221	238.75	2.59432	21.3923	13.4649	14.1045	2.1646	1.41045e-05	2.1646	4.55662	5.19843e-06	0.000159242	190	12.7447	LOC529196	LOC529196 #FE0000,#FFFFF0	NM_001075921.1
C+	BOLA3.1	182	62	77.5	2.68478	7.49314	3.52131	4.23375	2.16456	4.23375e-06	2.16456	2.45754	0.0139892	0.10467	28	1.87816	BOLA3	BOLA3 #FE0000,#FFFFF0	NM_001035452.1
C+	CHCHD4.1	883	464	454.75	2.64318	34.2654	28.9496	25.6962	2.16131	2.56962e-05	2.16131	6.14489	8.0025e-10	5.832e-08	294	19.7207	CHCHD4	CHCHD4 #FE0000,#FFFFF0	NM_001046159.1
C+	LAX1.1	1359	773	723.25	2.59923	75.5312	47.8418	41.725	2.15604	4.1725e-05	2.15604	3.38529	0.000711033	0.0099964	614	41.1854	LAX1	LAX1 #FE0000,#FFFFF0	NM_001015674.1
C+	CPT1C.1	275	180	158.25	2.70161	15.7452	10.4119	9.01176	2.15408	9.01176e-06	2.15408	3.63178	0.00028148	0.00480731	70	4.6954	CPT1C	CPT1C #FE0000,#FFFFF0	XM_591445.3
C+	NOC4L.1	210	42	77.5	2.76136	9.10693	4.14471	4.16985	2.15389	4.16985e-06	2.15389	2.41036	0.0159366	0.114163	37	2.48185	NOC4L	NOC4L #FE0000,#FFFFF0	XM_001787619.1
C+	KIF15.1	307	271	203.5	2.65112	22.3251	11.7267	11.8426	2.15219	1.18426e-05	2.15219	3.57667	0.000348008	0.00562019	111	7.44556	KIF15	KIF15 #FE0000,#FFFFF0	XM_614710.3
C+	CCT5.1	3561	1950	1951.75	2.65648	123.303	109.467	109.484	2.14912	0.000109484	2.14912	12.6424	0	0	1313	88.0723	CCT5	CCT5 #FE0000,#FFFFF0	XM_001789281.1
C+	TRIM25.1	4649	1980	2196.75	2.65076	212.001	114.268	124.231	2.14142	0.000124231	2.14142	4.12189	3.75775e-05	0.000903068	1161	77.8765	TRIM25	TRIM25 #FE0000,#FFFFF0	NM_001100336.1
C+	GRAMD3.1	1393	905	843.5	2.60361	66.8366	49.0362	48.1729	2.14042	4.81729e-05	2.14042	7.93393	2.22045e-15	3.89775e-13	671	45.0087	GRAMD3	GRAMD3 #FE0000,#FFFFF0	NM_001079579.1
C+	CDK1.1	149	82	74	2.63536	9.97759	4.36043	4.20984	2.13555	4.20984e-06	2.13555	2.28975	0.0220357	0.14382	48	3.2197	CDK1	CDK1 #FE0000,#FFFFF0	NM_174016.2
C+	LOC531049.1	2063	480	830.5	2.66935	87.7177	53.4281	46.0944	2.13342	4.60944e-05	2.13342	3.12823	0.00175861	0.0210689	464	31.1238	LOC531049	LOC531049 #FE0000,#FFFFF0	XM_883226.3
C+	INTS5.1	569	284	277.75	2.66317	21.4404	16.0548	15.1426	2.12861	1.51426e-05	2.12861	4.67446	2.94728e-06	9.64292e-05	197	13.2142	INTS5	INTS5 #FE0000,#FFFFF0	NM_001098026.1
C+	CXCR3.1	396	66	136.75	2.73651	16.931	6.54441	7.19934	2.12573	7.19934e-06	2.12573	2.39649	0.0165531	0.117166	63	4.22586	CXCR3	CXCR3 #FE0000,#FFFFF0	NM_001011673.1
C+	AMIGO3.1	1201	315	450.25	2.71687	50.8452	18.0793	23.818	2.12199	2.3818e-05	2.12199	3.24804	0.00116204	0.0148846	264	17.7084	AMIGO3	AMIGO3 #FE0000,#FFFFF0	NM_001046168.1
C+	KIF20A.1	74	44	47.25	2.61538	5.92377	2.7862	2.79644	2.11732	2.79644e-06	2.11732	2.00231	0.0452514	0.2416	14	0.93908	KIF20A	KIF20A #FE0000,#FFFFF0	NM_001046288.1
C+	SDHAF2.1	1829	1094	961	2.63366	71.3181	56.6036	52.3954	2.11643	5.23954e-05	2.11643	6.38927	1.66691e-10	1.40795e-08	713	47.826	SDHAF2	SDHAF2 #FE0000,#FFFFF0	NM_001077045.1
C+	PRMT1.1	5233	1610	2447	2.66746	222.712	157.624	135.856	2.11375	0.000135856	2.11375	4.14005	3.47229e-05	0.000843503	1293	86.7307	PRMT1	PRMT1 #FE0000,#FFFFF0	NM_001015624.1
C+	GRWD1.1	691	269	305.25	2.68414	27.7076	11.5138	16.4228	2.11059	1.64228e-05	2.11059	4.09092	4.29665e-05	0.00100856	143	9.59203	GRWD1	GRWD1 #FE0000,#FFFFF0	NM_001076239.1
C+	KLF5.1	193	131	96	2.64103	11.4105	3.86067	5.20057	2.10625	5.20057e-06	2.10625	2.67857	0.00739365	0.0646404	38	2.54893	KLF5	KLF5 #FE0000,#FFFFF0	NM_001083727.1
C+	UBC.1	3852	2204	1666.5	2.61053	163.709	120.898	88.186	2.10524	8.8186e-05	2.10524	3.00994	0.00261299	0.02884	1265	84.8526	UBC	UBC #FE0000,#FFFFF0	XM_874550.4
C+	LOC100139209.1	646	341	263	2.64632	27.3382	21.8902	14.066	2.10314	1.4066e-05	2.10314	2.61454	0.00893488	0.074935	116	7.78095	LOC100139209	LOC100139209 #FE0000,#FFFFF0	XM_001787176.2
C+	FADD.1	1444	396	543.5	2.63705	62.161	30.7338	29.6261	2.10112	2.96261e-05	2.10112	2.6382	0.00833474	0.0709331	267	17.9096	FADD	FADD #FE0000,#FFFFF0	NM_001007816.1
C+	RUVBL2.1	266	104	96.25	2.59751	11.2389	6.50763	5.04879	2.09814	5.04879e-06	2.09814	2.39412	0.0166601	0.117707	61	4.0917	RUVBL2	RUVBL2 #FE0000,#FFFFF0	NM_001038526.1
C+	PPP5C.1	1693	527	735	2.62701	68.0779	38.0915	40.4545	2.09627	4.04545e-05	2.09627	4.0521	5.0761e-05	0.00114621	386	25.8918	PPP5C	PPP5C #FE0000,#FFFFF0	XM_587369.5
C+	LOC788846.1	184	127	91	2.59649	9.46894	4.81707	4.9814	2.09379	4.9814e-06	2.09379	2.65417	0.00795038	0.0683952	66	4.42709	LOC788846	LOC788846 #FE0000,#FFFFF0	XM_001255772.2
C+	LOC526769.1	173	72	77.75	2.48095	12.2168	2.63558	4.68603	2.09299	4.68603e-06	2.09299	2.26023	0.0238068	0.152277	44	2.95139	LOC526769	LOC526769 #FE0000,#FFFFF0	XM_605143.5
C+	LOC789183.1	2645	930	1110.75	2.53684	151.725	59.6851	64.4194	2.088	6.44194e-05	2.088	2.44387	0.0145306	0.10729	636	42.661	LOC789183	LOC789183 #FE0000,#FFFFF0	XM_001256010.3
C+	PSMB5.1	1068	522	499.75	2.58777	37.3564	32.4338	27.0936	2.08689	2.70936e-05	2.08689	6.17739	6.51744e-10	4.81932e-08	338	22.6721	PSMB5	PSMB5 #FE0000,#FFFFF0	NM_001037612.1
C+	F2RL1.1	469	288	242.25	2.53566	26.1934	13.3559	13.6899	2.08673	1.36899e-05	2.08673	3.26373	0.00109956	0.0142562	164	11.0006	F2RL1	F2RL1 #FE0000,#FFFFF0	NM_001046283.1
C+	MELK.1	119	91	71.75	2.53476	7.98477	5.27135	4.19425	2.08597	4.19425e-06	2.08597	2.4298	0.015107	0.110295	45	3.01847	MELK	MELK #FE0000,#FFFFF0	NM_001111260.1
C+	LOC530929.1	118	94	78	2.49282	6.35321	4.81234	4.5744	2.08581	4.5744e-06	2.08581	2.53741	0.0111675	0.0883034	69	4.62832	LOC530929	LOC530929 #FE0000,#FFFFF0	XM_609410.5
C+	PHB.1	1409	581	690.25	2.59227	59.0659	43.8185	38.6063	2.08536	3.86063e-05	2.08536	5.26454	1.40548e-07	6.53743e-06	446	29.9164	PHB	PHB #FE0000,#FFFFF0	NM_001034572.1
C+	IFI16.1	10539	3407	4272.25	2.47561	611.612	191.731	249.269	2.08348	0.000249269	2.08348	2.19684	0.0280321	0.17221	4228	283.602	IFI16	IFI16 #FE0000,#FFFFF0	XM_863928.2
C+	HSPH1.1	2506	1288	1414.75	2.53236	111.381	78.8189	80.6713	2.07722	8.06713e-05	2.07722	7.30859	2.70006e-13	3.56249e-11	1132	75.9313	HSPH1	HSPH1 #FE0000,#FFFFF0	NM_001075302.1
C+	RDH13.1	130	37	53	2.61832	5.14132	3.02903	2.84658	2.07622	2.84658e-06	2.07622	1.99588	0.045947	0.244152	38	2.54893	RDH13	RDH13 #FE0000,#FFFFF0	NM_001075345.1
C+	CTU1.1	306	129	117.25	2.53268	12.798	7.71367	6.31116	2.07128	6.31116e-06	2.07128	2.37743	0.0174339	0.121778	63	4.22586	CTU1	CTU1 #FE0000,#FFFFF0	NM_001077954.1
C+	HSP90AB1.1	28140	17106	16543.5	2.55792	1125.04	910.745	926.771	2.06731	0.000926771	2.06731	15.3596	0	0	11208	751.8	HSP90AB1	HSP90AB1 #FE0000,#FFFFF0	NM_001079637.1
C+	HMGCS1 (NC_007318 33427291..33453264).1	366	123	125.25	2.5136	15.2386	9.02966	6.73562	2.06548	6.73562e-06	2.06548	2.05023	0.0403422	0.221554	65	4.36001	HMGCS1 (NC_007318 33427291..33453264)	HMGCS1 (NC_007318 33427291..33453264) #FE0000,#FFFFF0	XM_609765.4
C+	NUSAP1.1	148	93	85.5	2.52679	10.6229	3.32509	4.84481	2.06006	4.84481e-06	2.06006	2.59102	0.00956917	0.0789427	37	2.48185	NUSAP1	NUSAP1 #FE0000,#FFFFF0	NM_001046571.1
C+	TUBA1B (NC_007303 33745419..33749261).1	19856	8047	8709.25	2.58055	771.516	494.499	463.563	2.05684	0.000463563	2.05684	4.76469	1.89148e-06	6.66377e-05	4898	328.544	TUBA1B (NC_007303 33745419..33749261)	TUBA1B (NC_007303 33745419..33749261) #FE0000,#FFFFF0	NM_001114856.1
C+	GPD2.1	1417	472	586.5	2.53333	63.0313	47.5693	32.8628	2.05313	3.28628e-05	2.05313	2.57545	0.0100111	0.0814242	423	28.3736	GPD2	GPD2 #FE0000,#FFFFF0	NM_001100296.1
C+	VARS.1	3436	959	1446	2.57345	137.374	77.5064	78.9087	2.05202	7.89087e-05	2.05202	3.76852	0.000164217	0.00307874	803	53.8629	VARS	VARS #FE0000,#FFFFF0	XM_581858.5
C+	NCLN.1	1688	510	725.5	2.53789	82.4324	36.0991	40.6817	2.05166	4.06817e-05	2.05166	3.0125	0.00259104	0.0286448	386	25.8918	NCLN	NCLN #FE0000,#FFFFF0	NM_001075955.1
C+	TAPBP.1	14418	9119	8373.25	2.524	574.662	459.156	468.51	2.05113	0.00046851	2.05113	13.3058	0	0	6039	405.079	TAPBP	TAPBP #FE0000,#FFFFF0	NM_001045885.1
C+	ALAS1.1	2359	571	1045.75	2.61257	99.7808	72.1722	56.9195	2.05112	5.69195e-05	2.05112	3.46552	0.000529201	0.0078321	519	34.813	ALAS1	ALAS1 #FE0000,#FFFFF0	NM_001101154.1
C+	MCM10.1	228	153	125.75	2.47941	16.1601	8.6174	7.35839	2.04941	7.35839e-06	2.04941	2.69895	0.00695584	0.0619125	67	4.49417	MCM10	MCM10 #FE0000,#FFFFF0	XM_605989.4
C+	C1QBP.1	1324	722	722.25	2.51336	45.4914	42.0534	40.0213	2.04708	4.00213e-05	2.04708	7.41717	1.19682e-13	1.68953e-11	595	39.9109	C1QBP	C1QBP #FE0000,#FFFFF0	NM_001034527.1
C+	ACOT7.1	693	211	287.75	2.56599	27.1491	16.6996	15.4565	2.04176	1.54565e-05	2.04176	3.93532	8.30855e-05	0.00174713	170	11.4031	ACOT7	ACOT7 #FE0000,#FFFFF0	NM_001075682.2
C+	CTPS.1	687	353	353	2.48788	27.0759	18.8838	19.6968	2.03732	1.96968e-05	2.03732	5.18735	2.13313e-07	9.48492e-06	266	17.8425	CTPS	CTPS #FE0000,#FFFFF0	NM_001077858.1
C+	GRAMD1A.2	1333	357	498	2.67254	55.9946	25.4514	25.6586	2.0349	2.56586e-05	2.0349	2.52829	0.011462	0.0901376	248	16.6351	GRAMD1A	GRAMD1A #FE0000,#FFFFF0	XM_002701855.1
C+	CHAF1A.1	549	274	282.5	2.51678	20.7422	12.7751	15.62	2.03174	1.562e-05	2.03174	4.53131	5.86198e-06	0.000177149	175	11.7385	CHAF1A	CHAF1A #FE0000,#FFFFF0	NM_001101842.1
C+	STIP1 (NC_007330 44288540..44301331).1	3976	2309	2196	2.47111	146.161	117.258	122.272	2.02419	0.000122272	2.02419	12.8713	0	0	1811	121.477	STIP1 (NC_007330 44288540..44301331)	STIP1 (NC_007330 44288540..44301331) #FE0000,#FFFFF0	NM_001035492.1
C+	RAD54L.1	127	119	85.25	2.47619	9.11408	4.82211	4.86376	2.02145	4.86376e-06	2.02145	2.5646	0.0103296	0.0833098	51	3.42093	RAD54L	RAD54L #FE0000,#FFFFF0	NM_001130766.1
C+	THOP1.1	969	239	379.5	2.56656	39.7432	16.1606	20.0995	2.01997	2.00995e-05	2.01997	3.54016	0.000399881	0.00627714	231	15.4948	THOP1	THOP1 #FE0000,#FFFFF0	NM_001033991.2
C+	KNTC1.1	154	106	95.5	2.4636	9.69528	6.50884	5.51503	2.0192	5.51503e-06	2.0192	2.72891	0.00635437	0.0580959	76	5.09786	KNTC1	KNTC1 #FE0000,#FFFFF0	XM_582786.3
C+	DHRS1.1	511	182	255.5	2.42142	19.2454	14.7694	14.5331	2.01757	1.45331e-05	2.01757	4.4276	9.52897e-06	0.00027017	219	14.6899	DHRS1	DHRS1 #FE0000,#FFFFF0	NM_001046294.1
C+	LOC515736.1	281	226	183.5	2.42248	14.5861	12.5572	10.5076	2.01596	1.05076e-05	2.01596	3.76281	0.000168018	0.0031309	160	10.7323	LOC515736	LOC515736 #FE0000,#FFFFF0	NM_001034509.1
C+	TNFRSF25.1	1399	385	462	2.51475	59.7768	25.7949	23.9803	2.0125	2.39803e-05	2.0125	2.16405	0.0304607	0.182358	268	17.9767	TNFRSF25	TNFRSF25 #FE0000,#FFFFF0	NM_001144077.1
C+	CHST11.1	1354	487	647.5	2.46576	73.0299	30.6446	36.6752	2.01221	3.66752e-05	2.01221	3.39396	0.000688905	0.00974557	336	22.5379	CHST11	CHST11 #FE0000,#FFFFF0	XM_607295.5
C+	CCDC102A.1	628	150	244	2.53701	30.9281	15.6234	13.3888	2.01173	1.33888e-05	2.01173	2.22203	0.0262811	0.163645	124	8.31756	CCDC102A	CCDC102A #FE0000,#FFFFF0	NM_001077915.1
C+	BAX (NC_007316 55542775..55547025).1	687	168	261.25	2.49286	27.6773	10.9624	13.6618	2.00956	1.36618e-05	2.00956	3.43541	0.000591657	0.00863613	222	14.8911	BAX (NC_007316 55542775..55547025)	BAX (NC_007316 55542775..55547025) #FE0000,#FFFFF0	NM_173894.1
C+	KIF4A.1	99	54	59	2.45679	7.03331	2.36541	3.41605	2.00824	3.41605e-06	2.00824	2.14002	0.0323529	0.190466	28	1.87816	KIF4A	KIF4A #FE0000,#FFFFF0	XM_617283.5
C+	GSDMD.1	2075	667	851.5	2.49714	84.6559	36.3161	45.8795	2.00571	4.58795e-05	2.00571	4.06934	4.71471e-05	0.00108278	551	36.9595	GSDMD	GSDMD #FE0000,#FFFFF0	NM_001046160.2
C+	BCS1L.1	249	105	116.75	2.43692	9.55654	7.74165	6.37454	2.00065	6.37454e-06	2.00065	2.91602	0.00354529	0.0367396	90	6.03694	BCS1L	BCS1L #FE0000,#FFFFF0	NM_001015671.1
C+	LGALS9.1	3927	1433	1903.5	1.76369	228.867	77.9611	87.8912	1.42127	8.78912e-05	1.42127	2.07421	0.0380602	0.212403	1893	126.977	LGALS9	LGALS9 ##000000,#FFFFF0	NM_001015570.3
C+	HMGCS1 (NC_007318 33427291..33453264).2	2034	1464	944	1.65397	90.885	36.9667	39.1637	1.33435	3.91637e-05	1.33435	2.82149	0.00478015	0.0461487	1805	121.074	HMGCS1 (NC_007318 33427291..33453264)	HMGCS1 (NC_007318 33427291..33453264) ##000000,#FFFFF0	XM_001252032.3
C-	TH1L.1	859	483	46.75	1.04432	26.2575	18.2228	-12.6584	-1.17543	-1.26584e-05	-1.17543	-1.98748	0.046869	0.247153	1373	92.0969	TH1L	TH1L ##000000,#FFFFF0	XM_592881.3
C-	KDM6A.1	596	223	-136.75	-1.15199	48.2295	19.3679	-22.6922	-1.36906	-2.26922e-05	-1.36906	-2.71215	0.00668488	0.0601011	1286	86.2612	KDM6A	KDM6A ##000000,#FFFFF0	XM_580363.5
C-	ARHGEF12.1	304	157	-148.5	-1.68197	23.8488	16.6198	-14.9879	-2.00024	-1.49879e-05	-2.00024	-3.89232	9.92897e-05	0.00202256	473	31.7275	ARHGEF12	ARHGEF12 #0000A9,#FFFFF0	NM_001123033.1
C-	NDRG3.1	849	494	-390.25	-1.67929	68.9089	42.2061	-38.9712	-2.00104	-3.89712e-05	-2.00104	-3.84862	0.000118787	0.0023602	1266	84.9196	NDRG3	NDRG3 #0000A9,#FFFFF0	NM_001101996.1
C-	SMC4.1	402	239	-131.25	-1.6917	26.3969	22.5009	-12.6225	-2.00129	-1.26225e-05	-2.00129	-2.03768	0.041582	0.226502	504	33.8069	SMC4	SMC4 #0000A9,#FFFFF0	NM_001105326.1
C-	BPTF.1	3180	1527	-1596.5	-1.70564	228.117	169.352	-156.648	-2.00298	-0.000156648	-2.00298	-4.69148	2.71242e-06	8.96165e-05	5124	343.703	BPTF	BPTF #0000A9,#FFFFF0	XM_001249745.3
C-	MFSD11.1	269	157	-118.75	-1.65068	23.5929	13.6609	-12.3294	-2.00567	-1.23294e-05	-2.00567	-3.15307	0.00161565	0.0196004	364	24.4161	MFSD11	MFSD11 #0000A9,#FFFFF0	NM_001075777.1
C-	AKT3.1	514	194	-171.75	-1.69888	32.2508	22.6745	-16.6332	-2.00655	-1.66332e-05	-2.00655	-2.68848	0.00717783	0.0633853	671	45.0087	AKT3	AKT3 #0000A9,#FFFFF0	XM_001788690.2
C-	C23H6orf145.1	387	154	-102	-1.61818	27.4677	9.11334	-10.5705	-2.00704	-1.05705e-05	-2.00704	-2.17202	0.0298542	0.180029	242	16.2327	C23H6orf145	C23H6orf145 #0000A9,#FFFFF0	NM_001076932.1
C-	CDK14.1	116	23	-39.75	-1.70354	7.61842	4.14315	-3.88006	-2.0081	-3.88006e-06	-2.0081	-2.28063	0.0225701	0.146408	153	10.2628	CDK14	CDK14 #0000A9,#FFFFF0	XM_001789662.2
C-	SLC35A5.1	1138	700	-446.25	-1.65746	87.9282	50.3	-45.1317	-2.00814	-4.51317e-05	-2.00814	-3.00885	0.00262242	0.0289283	1508	101.152	SLC35A5	SLC35A5 #0000A9,#FFFFF0	NM_001076025.2
C-	RALGAPA2.1	601	342	-274.5	-1.66626	63.1183	27.4272	-28.42	-2.00838	-2.842e-05	-2.00838	-2.97268	0.00295212	0.0316851	846	56.7472	RALGAPA2	RALGAPA2 #0000A9,#FFFFF0	NM_001110439.1
C-	ACAD10.1	291	193	-129.25	-1.65443	19.6997	12.8408	-13.1227	-2.01045	-1.31227e-05	-2.01045	-4.19747	2.69921e-05	0.000682819	445	29.8493	ACAD10	ACAD10 #0000A9,#FFFFF0	XM_588758.5
C-	RBL1.1	1009	547	-383.25	-1.68346	68.5134	53.8797	-37.8881	-2.01091	-3.78881e-05	-2.01091	-3.14703	0.0016494	0.0199739	1352	90.6883	RBL1	RBL1 #0000A9,#FFFFF0	XM_603207.5
C-	LOC782355.1	207	76	-71.75	-1.7104	13.5079	8.82522	-6.93491	-2.01193	-6.93491e-06	-2.01193	-2.63304	0.00846243	0.0717477	274	18.3791	LOC782355	LOC782355 #0000A9,#FFFFF0	XM_001251003.3
C-	ZMYM2.1	400	264	-195	-1.72829	34.0945	21.5994	-18.9226	-2.01278	-1.89226e-05	-2.01278	-3.37244	0.000745062	0.0104015	614	41.1854	ZMYM2	ZMYM2 #0000A9,#FFFFF0	NM_001101907.1
C-	KLF7.1	207	97	-95.75	-1.766	16.8002	12.3346	-9.02244	-2.01855	-9.02244e-06	-2.01855	-3.10229	0.0019203	0.0225772	236	15.8302	KLF7	KLF7 #0000A9,#FFFFF0	XM_617930.4
C-	SFT2D2.1	79	65	-50.75	-1.67219	7.41231	6.06123	-5.20743	-2.02198	-5.20743e-06	-2.02198	-2.65411	0.00795183	0.0683952	143	9.59203	SFT2D2	SFT2D2 #0000A9,#FFFFF0	XM_583469.4
C-	SPG20.1	460	140	-144.75	-1.66628	26.3956	17.6883	-14.637	-2.02215	-1.4637e-05	-2.02215	-2.68065	0.00734806	0.0643817	601	40.3133	SPG20	SPG20 #0000A9,#FFFFF0	NM_001077996.1
C-	IFT80.1	405	236	-128.5	-1.66237	29.6239	18.9433	-13.0321	-2.02259	-1.30321e-05	-2.02259	-2.0994	0.0357817	0.204277	491	32.9349	IFT80	IFT80 #0000A9,#FFFFF0	NM_001098959.1
C-	LOC514916.1	3766	1894	-1582	-1.69287	273.493	197.814	-157.963	-2.02443	-0.000157963	-2.02443	-3.70552	0.000210958	0.00376534	5316	356.582	LOC514916	LOC514916 #0000A9,#FFFFF0	XM_592833.5
C-	NBEAL1.1	293	115	-120.5	-1.83391	19.9034	13.031	-10.9095	-2.0248	-1.09095e-05	-2.0248	-2.62274	0.00872263	0.0735828	381	25.5564	NBEAL1	NBEAL1 #0000A9,#FFFFF0	NM_001103173.1
C-	TMTC4.1	339	166	-126	-1.66932	21.2597	17.3899	-12.7438	-2.0262	-1.27438e-05	-2.0262	-3.25875	0.00111904	0.0144623	446	29.9164	TMTC4	TMTC4 #0000A9,#FFFFF0	NM_001105629.1
C-	CDC42BPA (NC_007314 27009806..27302801).2	331	113	-102.25	-1.63509	19.551	17.0223	-10.9691	-2.03024	-1.09691e-05	-2.03024	-2.31926	0.0203807	0.13614	406	27.2333	CDC42BPA (NC_007314 27009806..27302801)	CDC42BPA (NC_007314 27009806..27302801) #0000A9,#FFFFF0	XM_618596.4
C-	RAB18.1	1135	726	-427.25	-1.67204	79.5705	58.2478	-43.0392	-2.03149	-4.30392e-05	-2.03149	-2.80418	0.00504448	0.0480798	1515	101.622	RAB18	RAB18 #0000A9,#FFFFF0	NM_001075499.1
C-	ZNF572.1	286	165	-94.5	-1.74263	19.8141	14.2437	-8.87084	-2.0327	-8.87084e-06	-2.0327	-2.00125	0.0453655	0.242081	356	23.8795	ZNF572	ZNF572 #0000A9,#FFFFF0	NM_001077064.1
C-	PLA2G4A.1	137	90	-56.25	-1.72115	13.5018	4.98901	-5.52405	-2.03329	-5.52405e-06	-2.03329	-2.36467	0.0180463	0.124761	171	11.4702	PLA2G4A	PLA2G4A #0000A9,#FFFFF0	NM_001075864.1
C-	CYP4V2.1	1549	644	-582.5	-1.73571	106.707	71.823	-56.1658	-2.03419	-5.61658e-05	-2.03419	-3.07723	0.00208933	0.0241981	2104	141.13	CYP4V2	CYP4V2 #0000A9,#FFFFF0	NM_001034373.1
C-	ZPBP2.1	520	319	-181.75	-1.72627	37.8893	22.2645	-17.4583	-2.03691	-1.74583e-05	-2.03691	-2.35785	0.018381	0.126234	647	43.3989	ZPBP2	ZPBP2 #0000A9,#FFFFF0	NM_001075661.1
C-	KCTD7.1	81	62	-33.25	-1.68205	5.74592	4.09853	-3.31464	-2.03771	-3.31464e-06	-2.03771	-2.12821	0.0333195	0.193951	101	6.77479	KCTD7	KCTD7 #0000A9,#FFFFF0	NM_001102545.1
C-	ANKRD32 (NC_007305 95157520..95198113).1	177	85	-54.25	-1.73311	10.5453	9.13846	-5.11985	-2.03775	-5.11985e-06	-2.03775	-2.05148	0.04022	0.221172	216	14.4887	ANKRD32 (NC_007305 95157520..95198113)	ANKRD32 (NC_007305 95157520..95198113) #0000A9,#FFFFF0	NM_001102058.2
C-	HRSP12 (NC_007312 64358647..64367082).1	3756	2221	-1277.5	-1.70038	328.285	120.423	-126.271	-2.03776	-0.000126271	-2.03776	-2.0096	0.0444737	0.238457	3871	259.656	HRSP12 (NC_007312 64358647..64367082)	HRSP12 (NC_007312 64358647..64367082) #0000A9,#FFFFF0	NM_001034208.1
C-	STMN1.1	1511	1090	-785.75	-1.71399	146.275	73.2828	-78.2146	-2.03784	-7.82146e-05	-2.03784	-3.92003	8.85382e-05	0.00183692	2305	154.613	STMN1	STMN1 #0000A9,#FFFFF0	NM_001034790.1
C-	LOC532798.1	147	115	-70.5	-1.75	14.2322	7.4258	-6.82288	-2.03936	-6.82288e-06	-2.03936	-2.56849	0.0102142	0.0826426	224	15.0253	LOC532798	LOC532798 #0000A9,#FFFFF0	XM_611981.5
C-	CCDC77.1	315	120	-122.5	-1.73025	19.3014	15.016	-11.7229	-2.04071	-1.17229e-05	-2.04071	-3.77787	0.00015818	0.00299548	424	28.4407	CCDC77	CCDC77 #0000A9,#FFFFF0	NM_001102106.1
C-	CD1A.1	125	94	-67.75	-1.63466	11.7082	6.08119	-7.27059	-2.04299	-7.27059e-06	-2.04299	-3.15724	0.00159271	0.0193952	184	12.3422	CD1A	CD1A #0000A9,#FFFFF0	NM_001102024.1
C-	LOXL3.1	58	42	-33	-1.66667	7.55763	2.97264	-3.48661	-2.04383	-3.48661e-06	-2.04383	-2.18694	0.0287467	0.175373	85	5.70156	LOXL3	LOXL3 #0000A9,#FFFFF0	XM_864547.3
C-	APPL1.1	585	300	-276.75	-1.71604	45.8626	29.5533	-27.4552	-2.04592	-2.74552e-05	-2.04592	-4.22728	2.36532e-05	0.00061295	859	57.6192	APPL1	APPL1 #0000A9,#FFFFF0	NM_001099003.1
C-	DMTF1.1	898	569	-374.25	-1.72214	77.768	45.9174	-37.0049	-2.04752	-3.70049e-05	-2.04752	-2.69714	0.00699387	0.0621687	1240	83.1756	DMTF1	DMTF1 #0000A9,#FFFFF0	XM_864821.4
C-	SSBP2.1	194	87	-78.75	-1.68478	13.2298	8.50524	-8.01398	-2.04844	-8.01398e-06	-2.04844	-3.3204	0.000898902	0.0120894	258	17.3059	SSBP2	SSBP2 #0000A9,#FFFFF0	NM_001035478.1
C-	REEP5.1	4531	1663	-1419	-1.70396	266.24	201.088	-138.774	-2.04926	-0.000138774	-2.04926	-2.65224	0.00799607	0.0686879	5597	375.431	REEP5	REEP5 #0000A9,#FFFFF0	NM_001046605.1
C-	APAF1.1	496	194	-214.5	-1.72712	31.836	25.6692	-21.1291	-2.05114	-2.11291e-05	-2.05114	-4.01731	5.88663e-05	0.00130015	711	47.6918	APAF1	APAF1 #0000A9,#FFFFF0	XM_002704359.1
C-	ZNF420.1	246	152	-92.25	-1.7193	19.4148	12.5441	-9.04629	-2.05273	-9.04629e-06	-2.05273	-2.25588	0.0240782	0.153576	323	21.6659	ZNF420	ZNF420 #0000A9,#FFFFF0	NM_001102552.1
C-	RBL2.1	3672	1608	-1557.75	-1.75145	242.417	181.151	-149.17	-2.05378	-0.00014917	-2.05378	-4.2153	2.49453e-05	0.000640674	5267	353.295	RBL2	RBL2 #0000A9,#FFFFF0	NM_001098073.1
C-	PSIP1.1	2695	1518	-1135.75	-1.73121	206.838	141.448	-110.894	-2.05446	-0.000110894	-2.05446	-3.35853	0.000783596	0.0108718	3732	250.332	PSIP1	PSIP1 #0000A9,#FFFFF0	XM_590212.4
C-	MANBA.1	750	410	-339	-1.71746	71.7162	28.7382	-33.9909	-2.0545	-3.39909e-05	-2.0545	-3.00787	0.00263086	0.0290055	940	63.0525	MANBA	MANBA #0000A9,#FFFFF0	NM_174387.2
C-	SNX18.1	1329	695	-683.25	-1.65745	109.725	74.1344	-72.1086	-2.05467	-7.21086e-05	-2.05467	-5.71509	1.09653e-08	6.66737e-07	1616	108.397	SNX18	SNX18 #0000A9,#FFFFF0	NM_001083731.1
C-	LOC617781.1	153	63	-41.5	-1.64093	10.5326	4.33688	-4.30753	-2.05539	-4.30753e-06	-2.05539	-2.04974	0.0403895	0.221621	99	6.64063	LOC617781	LOC617781 #0000A9,#FFFFF0	XM_870102.4
C-	ARID4A.1	1785	1054	-720	-1.74036	135.835	86.9814	-69.4147	-2.05625	-6.94147e-05	-2.05625	-3.07596	0.00209826	0.0242737	2377	159.442	ARID4A	ARID4A #0000A9,#FFFFF0	XM_864346.3
C-	MGC159500.1	1341	273	-427	-1.7	78.4959	41.6325	-42.1221	-2.06111	-4.21221e-05	-2.06111	-3.77418	0.000160536	0.00302309	1665	111.683	MGC159500	MGC159500 #0000A9,#FFFFF0	NM_001098890.1
C-	ZMYM6.1	1196	557	-374	-1.74428	72.2574	62.3139	-35.5621	-2.06356	-3.55621e-05	-2.06356	-2.05003	0.0403617	0.221554	1468	98.4692	ZMYM6	ZMYM6 #0000A9,#FFFFF0	XM_870563.3
C-	NAA16.1	113	53	-37.25	-1.73039	7.01975	5.94613	-3.6405	-2.06436	-3.6405e-06	-2.06436	-2.08679	0.0369068	0.208227	142	9.52495	NAA16	NAA16 #0000A9,#FFFFF0	NM_001103100.1
C-	TET2.1	2579	1476	-1308.75	-1.74234	198.038	141.232	-129.309	-2.06492	-0.000129309	-2.06492	-3.91932	8.87993e-05	0.00184044	4090	274.345	TET2	TET2 #0000A9,#FFFFF0	XM_001790146.2
C-	LOC521172.1	276	182	-148.75	-1.72296	34.1168	12.7946	-15.1963	-2.06599	-1.51963e-05	-2.06599	-2.89393	0.0038046	0.0389075	401	26.8979	LOC521172	LOC521172 #0000A9,#FFFFF0	XM_599430.5
C-	DNAH7.1	79	36	-44.5	-1.73554	7.99287	3.93601	-4.45372	-2.06885	-4.45372e-06	-2.06885	-2.49094	0.0127406	0.0974957	105	7.0431	DNAH7	DNAH7 #0000A9,#FFFFF0	NM_001143874.1
C-	MYO5A.1	2816	1481	-1442	-1.78348	204.061	166.239	-137.061	-2.071	-0.000137061	-2.071	-4.86314	1.1554e-06	4.27966e-05	4487	300.975	MYO5A	MYO5A #0000A9,#FFFFF0	XM_615219.4
C-	ARMCX3.1	1205	718	-498.75	-1.71403	87.5154	65.732	-49.6625	-2.07103	-4.96625e-05	-2.07103	-3.42643	0.000611565	0.00884994	1632	109.47	ARMCX3	ARMCX3 #0000A9,#FFFFF0	XM_594906.5
C-	MPZL3.1	269	189	-111	-1.71845	23.3285	13.1289	-11.0252	-2.07184	-1.10252e-05	-2.07184	-2.54296	0.0109917	0.0871864	348	23.3428	MPZL3	MPZL3 #0000A9,#FFFFF0	NM_001098051.1
C-	CCDC84 (NC_007313 28207254..28215489).2	90	43	-46	-1.63668	7.77909	5.30425	-5.01431	-2.07191	-5.01431e-06	-2.07191	-2.64553	0.00815631	0.0697085	116	7.78095	CCDC84 (NC_007313 28207254..28215489)	CCDC84 (NC_007313 28207254..28215489) #0000A9,#FFFFF0	XM_001252706.3
C-	LTBP1 (NC_007309 16294657..16518047).1	128	55	-69.75	-1.76022	16.1307	6.07223	-7.00512	-2.07208	-7.00512e-06	-2.07208	-2.56289	0.0103805	0.0835528	162	10.8665	LTBP1 (NC_007309 16294657..16518047)	LTBP1 (NC_007309 16294657..16518047) #0000A9,#FFFFF0	NM_001103091.1
C-	ZNF547.1	209	118	-94.75	-1.71107	18.3679	9.30165	-9.57108	-2.07468	-9.57108e-06	-2.07468	-3.30259	0.000957969	0.0127647	267	17.9096	ZNF547	ZNF547 #0000A9,#FFFFF0	NM_001105360.1
C-	NAGA.1	2424	1864	-1004.25	-1.70897	165.706	118.087	-99.3041	-2.07513	-9.93041e-05	-2.07513	-3.32379	0.000888028	0.0120152	3067	205.726	NAGA	NAGA #0000A9,#FFFFF0	NM_001046349.1
C-	FAM129A.1	1008	627	-521.75	-1.75946	68.62	51.0438	-50.1044	-2.07763	-5.01044e-05	-2.07763	-8.15431	3.51228e-16	6.95122e-14	1341	89.9504	FAM129A	FAM129A #0000A9,#FFFFF0	XM_001787712.2
C-	LOC100140518.1	1120	779	-487.5	-1.74229	91.7608	60.7304	-47.5346	-2.07788	-4.75346e-05	-2.07788	-3.16515	0.00155006	0.0189873	1525	102.293	LOC100140518	LOC100140518 #0000A9,#FFFFF0	XM_001787298.2
C-	CD68.1	17525	10230	-7596.5	-1.66506	1015.45	750.049	-788.325	-2.07816	-0.000788325	-2.07816	-11.0501	2.19169e-28	6.06077e-26	23089	1548.74	CD68	CD68 #0000A9,#FFFFF0	NM_001045902.1
C-	LIN54.1	590	263	-275.75	-1.73192	40.0887	30.2422	-27.4038	-2.0796	-2.74038e-05	-2.0796	-5.14921	2.61587e-07	1.14053e-05	854	57.2839	LIN54	LIN54 #0000A9,#FFFFF0	XM_001788579.2
C-	LOC615982.1	109	44	-36.25	-1.63877	7.90612	5.60974	-3.96913	-2.08011	-3.96913e-06	-2.08011	-2.30283	0.0212885	0.140167	70	4.6954	LOC615982	LOC615982 #0000A9,#FFFFF0	XM_867931.4
C-	SRPK2.1	851	369	-356.75	-1.76188	53.817	46.1937	-34.1626	-2.08036	-3.41626e-05	-2.08036	-4.30718	1.65353e-05	0.000444472	1159	77.7424	SRPK2	SRPK2 #0000A9,#FFFFF0	XM_590213.5
C-	SNAI1.1	249	104	-78.75	-1.77206	17.1731	6.85623	-7.26004	-2.08092	-7.26004e-06	-2.08092	-2.24229	0.0249425	0.157496	203	13.6167	SNAI1	SNAI1 #0000A9,#FFFFF0	NM_001112708.1
C-	ZNF527.1	234	107	-75.25	-1.7659	14.1758	11.8361	-7.09445	-2.08281	-7.09445e-06	-2.08281	-2.26357	0.0236009	0.151344	277	18.5804	ZNF527	ZNF527 #0000A9,#FFFFF0	NM_001076914.1
C-	ALMS1.1	930	478	-401.25	-1.77913	65.5596	48.5939	-38.4066	-2.08433	-3.84066e-05	-2.08433	-3.55414	0.000379215	0.00603248	1320	88.5418	ALMS1	ALMS1 #0000A9,#FFFFF0	XM_612325.4
C-	TIE1.1	112	53	-42.25	-1.77523	6.87555	4.35934	-3.96985	-2.08538	-3.96985e-06	-2.08538	-2.3635	0.0181034	0.124984	144	9.65911	TIE1	TIE1 #0000A9,#FFFFF0	NM_173965.2
C-	ST3GAL6.1	1678	689	-519.5	-1.75127	100.571	75.5444	-49.4504	-2.0858	-4.94504e-05	-2.0858	-2.17882	0.029345	0.178161	2017	135.295	ST3GAL6	ST3GAL6 #0000A9,#FFFFF0	NM_001002883.2
C-	CCNI.1	5440	2859	-2213	-1.74795	372.06	278.59	-215.309	-2.08604	-0.000215309	-2.08604	-3.55117	0.000383532	0.00607245	7373	494.56	CCNI	CCNI #0000A9,#FFFFF0	NM_001083373.1
C-	FAM115A.1	744	340	-317.5	-1.75192	58.8149	34.9519	-31.2412	-2.08737	-3.12412e-05	-2.08737	-3.2497	0.00115529	0.0148169	1025	68.754	FAM115A	FAM115A #0000A9,#FFFFF0	NM_001099054.1
C-	LOC100298796.1	169	123	-73	-1.84638	14.3653	9.34342	-6.66614	-2.08837	-6.66614e-06	-2.08837	-2.35788	0.0183797	0.126234	242	16.2327	LOC100298796	LOC100298796 #0000A9,#FFFFF0	XM_002700965.1
C-	IL7R.1	5367	2079	-2141.25	-1.77093	333.576	244.486	-203.505	-2.0909	-0.000203505	-2.0909	-4.40195	1.07284e-05	0.000300769	7189	482.217	IL7R	IL7R #0000A9,#FFFFF0	XM_599818.5
C-	PDZK1.1	89	51	-40.5	-1.68644	7.17172	5.0536	-4.27154	-2.09244	-4.27154e-06	-2.09244	-2.45681	0.0140177	0.104756	124	8.31756	PDZK1	PDZK1 #0000A9,#FFFFF0	NM_001034611.1
C-	HVCN1.1	523	243	-257	-1.76036	33.0271	30.0285	-25.0023	-2.09297	-2.50023e-05	-2.09297	-5.9449	2.76639e-09	1.83701e-07	796	53.3934	HVCN1	HVCN1 #0000A9,#FFFFF0	XM_868620.3
C-	LOC534295.1	1741	675	-800.5	-1.83998	131.061	80.8392	-75.1123	-2.09385	-7.51123e-05	-2.09385	-3.12424	0.00178268	0.0212555	2388	160.18	LOC534295	LOC534295 #0000A9,#FFFFF0	XM_614016.4
C-	FAM45A.1	1690	796	-570.5	-1.73235	106.751	81.9855	-56.037	-2.09609	-5.6037e-05	-2.09609	-2.56235	0.0103966	0.0835794	2088	140.057	FAM45A	FAM45A #0000A9,#FFFFF0	NM_001076902.2
C-	C7.1	76	52	-34.75	-1.82738	6.17101	3.96655	-3.18798	-2.0977	-3.18798e-06	-2.0977	-2.12574	0.0335247	0.194831	108	7.24433	C7	C7 #0000A9,#FFFFF0	NM_001045966.1
C-	RNPC3.1	266	175	-94	-1.74162	20.7441	11.7187	-9.26766	-2.09913	-9.26766e-06	-2.09913	-2.2379	0.0252278	0.15885	324	21.733	RNPC3	RNPC3 #0000A9,#FFFFF0	NM_001077117.1
C-	PHOSPHO2.1	314	177	-113.5	-1.7774	22.0797	16.7099	-10.6516	-2.10446	-1.06516e-05	-2.10446	-2.16707	0.0302292	0.181347	390	26.1601	PHOSPHO2	PHOSPHO2 #0000A9,#FFFFF0	NM_001045965.1
C-	ARRDC3.1	2195	614	-753.75	-1.77526	138.051	70.9316	-71.9461	-2.10527	-7.19461e-05	-2.10527	-3.11866	0.00181674	0.0215732	2920	195.865	ARRDC3	ARRDC3 #0000A9,#FFFFF0	NM_001076257.1
C-	PPAP2A.1	178	91	-93	-1.775	13.9355	8.99445	-9.05157	-2.1056	-9.05157e-06	-2.1056	-3.59022	0.000330406	0.0054051	270	18.1108	PPAP2A	PPAP2A #0000A9,#FFFFF0	NM_001080329.1
C-	SNX2.1	3467	1756	-1151.25	-1.76343	220.768	158.083	-110.707	-2.10687	-0.000110707	-2.10687	-2.38063	0.0172833	0.120935	4161	279.108	SNX2	SNX2 #0000A9,#FFFFF0	NM_001038519.1
C-	LOC615768.1	168	72	-61.25	-1.90074	12.4893	7.35101	-5.35556	-2.10711	-5.35556e-06	-2.10711	-2.11992	0.0340131	0.196852	227	15.2265	LOC615768	LOC615768 #0000A9,#FFFFF0	XM_867662.4
C-	CEP97.1	174	78	-83.25	-1.77986	13.3381	8.12975	-8.13126	-2.10823	-8.13126e-06	-2.10823	-3.40542	0.000660629	0.009434	251	16.8364	CEP97	CEP97 #0000A9,#FFFFF0	XM_593737.5
C-	TBC1D9B.1	2465	1856	-1256.5	-1.7214	222.662	123.27	-128.013	-2.11194	-0.000128013	-2.11194	-3.9012	9.57176e-05	0.00195374	3766	252.612	TBC1D9B	TBC1D9B #0000A9,#FFFFF0	NM_001101999.1
C-	UBN2.1	223	116	-107.25	-1.81404	24.3851	9.56084	-10.5074	-2.11329	-1.05074e-05	-2.11329	-2.59258	0.00952595	0.0787148	288	19.3182	UBN2	UBN2 #0000A9,#FFFFF0	XM_873000.4
C-	CCDC15.1	522	268	-203	-1.76894	36.413	25.6702	-19.6075	-2.11509	-1.96075e-05	-2.11509	-3.03966	0.00236845	0.0266065	670	44.9417	CCDC15	CCDC15 #0000A9,#FFFFF0	XM_589795.4
C-	FAIM.1	123	91	-47.25	-1.81116	10.2802	6.24356	-4.37546	-2.11707	-4.37546e-06	-2.11707	-2.00312	0.0451645	0.241264	151	10.1286	FAIM	FAIM #0000A9,#FFFFF0	NM_001079626.1
C-	TSC1.1	117	54	-63.75	-1.82258	10.9918	7.07353	-6.13011	-2.12137	-6.13011e-06	-2.12137	-2.94741	0.00320449	0.0337449	176	11.8056	TSC1	TSC1 #0000A8,#FFFFF0	NM_001075992.1
C-	ARMC2.1	46	30	-29.25	-1.79592	3.68172	3.12406	-2.82762	-2.12145	-2.82762e-06	-2.12145	-2.01583	0.0438181	0.235903	78	5.23202	ARMC2	ARMC2 #0000A8,#FFFFF0	NM_001075801.2
C-	MAGI3.1	669	386	-252.75	-1.77949	47.7321	35.012	-24.3869	-2.12282	-2.43869e-05	-2.12282	-2.71839	0.00656005	0.0592621	838	56.2106	MAGI3	MAGI3 #0000A8,#FFFFF0	XM_612177.3
C-	TLR6.1	787	539	-296.25	-1.766	61.3511	41.7889	-28.913	-2.1229	-2.8913e-05	-2.1229	-2.35664	0.0184412	0.126451	985	66.071	TLR6	TLR6 #0000A8,#FFFFF0	NM_001001159.1
C-	ANKRD50.1	180	65	-78.5	-1.85792	12.2981	7.79267	-7.21461	-2.12731	-7.21461e-06	-2.12731	-3.22534	0.00125825	0.0159478	259	17.373	ANKRD50	ANKRD50 #0000A8,#FFFFF0	XM_606363.3
C-	ZNF624.1	313	89	-87	-1.79634	19.5456	11.7982	-7.99664	-2.12809	-7.99664e-06	-2.12809	-1.99272	0.0462922	0.245097	354	23.7453	ZNF624	ZNF624 #0000A8,#FFFFF0	XM_585787.5
C-	BRWD1.1	1651	806	-840	-1.81752	114.179	90.2176	-80.2989	-2.12991	-8.02989e-05	-2.12991	-4.6739	2.95542e-06	9.6539e-05	2531	169.772	BRWD1	BRWD1 #0000A8,#FFFFF0	NM_001103174.1
C-	IMPACT (NC_007325 33480798..33484453).1	80	37	-31	-1.775	4.60488	4.1713	-2.98555	-2.12993	-2.98555e-06	-2.12993	-2.07636	0.0378611	0.212011	106	7.11017	IMPACT (NC_007325 33480798..33484453)	IMPACT (NC_007325 33480798..33484453) #0000A8,#FFFFF0	NM_001102501.1
C-	SMARCD3.1	86	64	-41.25	-1.66802	7.78984	4.94591	-4.46061	-2.13275	-4.46061e-06	-2.13275	-2.53999	0.0110854	0.087792	116	7.78095	SMARCD3	SMARCD3 #0000A8,#FFFFF0	NM_001078154.1
C-	INSR.1	203	130	-124.75	-1.77125	17.3368	11.654	-12.3381	-2.13301	-1.23381e-05	-2.13301	-4.22468	2.39284e-05	0.000618836	320	21.4647	INSR	INSR #0000A8,#FFFFF0	XM_590552.5
C-	USP28.1	516	216	-244.75	-1.79593	33.6513	25.7986	-23.7608	-2.13458	-2.37608e-05	-2.13458	-4.9575	7.14088e-07	2.81e-05	766	51.3811	USP28	USP28 #0000A8,#FFFFF0	XM_865093.3
C-	CYP2U1.1	112	77	-55.5	-1.85714	11.2365	3.17788	-5.23465	-2.1348	-5.23465e-06	-2.1348	-2.75315	0.00590245	0.0545715	139	9.32372	CYP2U1	CYP2U1 #0000A8,#FFFFF0	NM_001076050.1
C-	PAK1.1	341	175	-164	-1.76014	26.2518	17.1198	-16.3215	-2.13543	-1.63215e-05	-2.13543	-4.86236	1.15999e-06	4.28877e-05	464	31.1238	PAK1	PAK1 #0000A8,#FFFFF0	NM_001076898.1
C-	OGT.1	4650	2514	-1931.25	-1.79886	333.72	255.343	-186.28	-2.13561	-0.00018628	-2.13561	-3.29261	0.000992618	0.013131	6250	419.232	OGT	OGT #0000A8,#FFFFF0	NM_001098070.1
C-	SEL1L3.1	72	40	-30.25	-1.62694	5.71384	2.90242	-3.39558	-2.13614	-3.39558e-06	-2.13614	-2.21823	0.0265392	0.165007	88	5.90279	SEL1L3	SEL1L3 #0000A8,#FFFFF0	XM_002704545.1
C-	TMEM156.1	2088	1282	-777.5	-1.77906	188.01	82.2963	-76.4254	-2.13663	-7.64254e-05	-2.13663	-2.17436	0.0296778	0.179266	2288	153.472	TMEM156	TMEM156 #0000A8,#FFFFF0	NM_001083469.1
C-	PICALM.1	16345	9542	-6382.75	-1.77461	1210.57	745.357	-619.907	-2.13824	-0.000619907	-2.13824	-2.8186	0.00482331	0.0464764	20719	1389.77	PICALM	PICALM #0000A8,#FFFFF0	NM_001101977.1
C-	AGL.1	247	105	-109.25	-1.81835	15.9921	13.012	-10.3746	-2.13954	-1.03746e-05	-2.13954	-3.75802	0.000171264	0.0031806	347	23.2758	AGL	AGL #0000A8,#FFFFF0	XM_595566.5
C-	LOC574091.1	266	151	-105.75	-1.7331	18.8226	14.3841	-10.7974	-2.14019	-1.07974e-05	-2.14019	-2.90819	0.00363533	0.037557	350	23.477	LOC574091	LOC574091 #0000A8,#FFFFF0	NM_001025347.1
C-	PRKD3.1	3022	1352	-1565	-1.8397	213.541	155.746	-148.232	-2.14161	-0.000148232	-2.14161	-4.78488	1.71094e-06	6.06557e-05	4647	311.707	PRKD3	PRKD3 #0000A8,#FFFFF0	XM_580387.4
C-	LOC785309.1	90	58	-42	-1.77419	6.3147	4.13639	-4.06857	-2.14386	-4.06857e-06	-2.14386	-2.43336	0.0149593	0.109527	122	8.18341	LOC785309	LOC785309 #0000A8,#FFFFF0	XM_001253376.3
C-	ZFP14.1	257	138	-94.25	-1.79536	15.8604	14.6139	-9.0245	-2.14427	-9.0245e-06	-2.14427	-2.62351	0.00870284	0.073508	328	22.0013	ZFP14	ZFP14 #0000A8,#FFFFF0	XM_001790640.1
C-	ZNF518A.1	1047	790	-420.75	-1.79424	92.3205	52.8309	-40.8155	-2.14494	-4.08155e-05	-2.14494	-2.32232	0.0202155	0.135308	1322	88.676	ZNF518A	ZNF518A #0000A8,#FFFFF0	XM_603021.3
C-	ZNF12.1	115	73	-46.75	-1.78571	9.06385	5.03678	-4.54985	-2.14731	-4.54985e-06	-2.14731	-2.57573	0.0100028	0.0814029	145	9.72618	ZNF12	ZNF12 #0000A8,#FFFFF0	NM_001110071.1
C-	EPS15.1	2871	1683	-1449.5	-1.81387	209.6	162.924	-140.472	-2.15143	-0.000140472	-2.15143	-4.55775	5.17062e-06	0.000158631	4338	290.981	EPS15	EPS15 #0000A8,#FFFFF0	NM_001098087.1
C-	HECA.1	3785	1875	-1598.25	-1.80183	258.08	207.397	-154.728	-2.15428	-0.000154728	-2.15428	-3.7214	0.000198126	0.0035935	5100	342.093	HECA	HECA #0000A8,#FFFFF0	XM_001255659.2
C-	ANKRD26.1	493	321	-199.25	-1.83368	48.2884	19.5671	-19.0871	-2.15543	-1.90871e-05	-2.15543	-2.09166	0.0364688	0.206622	562	37.6973	ANKRD26	ANKRD26 #0000A8,#FFFFF0	NM_001113767.1
C-	AAK1.1	702	399	-356.5	-1.79933	71.7346	30.9944	-35.2407	-2.15621	-3.52407e-05	-2.15621	-3.72906	0.000192201	0.00349231	942	63.1866	AAK1	AAK1 #0000A8,#FFFFF0	XM_611658.4
C-	EEPD1.1	80	21	-29	-1.85294	5.4343	3.03548	-2.68125	-2.15624	-2.68125e-06	-2.15624	-1.98216	0.0474616	0.249507	104	6.97602	EEPD1	EEPD1 #0000A8,#FFFFF0	NM_001034409.1
C-	FAM125B.1	186	64	-95.25	-1.77439	17.8564	8.31646	-9.63518	-2.15693	-9.63518e-06	-2.15693	-3.75824	0.000171113	0.0031806	266	17.8425	FAM125B	FAM125B #0000A8,#FFFFF0	XM_869668.4
C-	ZBED5.1	597	334	-210.75	-1.80902	41.2967	30.4656	-20.133	-2.15832	-2.0133e-05	-2.15832	-2.33255	0.019672	0.132683	730	48.9663	ZBED5	ZBED5 #0000A8,#FFFFF0	NM_001099388.2
C-	MGC152321.1	98	46	-37	-1.8655	5.88949	3.59273	-3.29745	-2.16008	-3.29745e-06	-2.16008	-2.20047	0.0277737	0.170935	121	8.11633	MGC152321	MGC152321 #0000A8,#FFFFF0	NM_001099207.1
C-	TMEM106B.1	420	270	-164.25	-1.88904	32.1519	23.329	-14.9033	-2.16017	-1.49033e-05	-2.16017	-2.25315	0.0242496	0.15423	557	37.362	TMEM106B	TMEM106B #0000A8,#FFFFF0	NM_001034337.1
C-	ITCH.1	1576	1010	-599.75	-1.83414	122.792	81.5278	-56.7256	-2.16262	-5.67256e-05	-2.16262	-2.36011	0.0182697	0.125745	1972	132.276	ITCH	ITCH #0000A8,#FFFFF0	NM_001082428.1
C-	LOC508335.1	230	125	-92.25	-1.83673	16.0943	12.7414	-8.7039	-2.16405	-8.7039e-06	-2.16405	-2.80551	0.00502379	0.0479278	302	20.2573	LOC508335	LOC508335 #0000A8,#FFFFF0	XM_585097.4
C-	SFRS18.1	3419	2635	-1336.75	-1.82401	300.525	162.928	-126.906	-2.16422	-0.000126906	-2.16422	-2.11911	0.0340811	0.197024	4261	285.816	SFRS18	SFRS18 #0000A8,#FFFFF0	NM_001078097.1
C-	ZNF432.1	154	67	-61.75	-1.82333	9.95759	7.82669	-5.89345	-2.16654	-5.89345e-06	-2.16654	-2.94696	0.00320914	0.0337762	200	13.4154	ZNF432	ZNF432 #0000A8,#FFFFF0	XM_586698.5
C-	SMARCA2.1	2846	1547	-1520	-1.82913	180.668	142.043	-145.592	-2.16972	-0.000145592	-2.16972	-11.6755	1.70235e-31	4.9805e-29	4233	283.937	SMARCA2	SMARCA2 #0000A8,#FFFFF0	NM_001099115.1
C-	MBTD1.1	360	170	-180.5	-1.85343	25.2573	18.067	-17.1458	-2.17398	-1.71458e-05	-2.17398	-4.61401	3.94972e-06	0.000124583	532	35.685	MBTD1	MBTD1 #0000A8,#FFFFF0	XM_867631.4
C-	BSPRY.1	66	44	-36.75	-1.85965	4.34672	3.48478	-3.42386	-2.17551	-3.42386e-06	-2.17551	-2.25162	0.0243462	0.154698	98	6.57356	BSPRY	BSPRY #0000A8,#FFFFF0	XM_587853.3
C-	CRLS1.1	1829	1220	-671.75	-1.78315	152.279	88.2635	-65.9052	-2.1795	-6.59052e-05	-2.1795	-2.21974	0.0264362	0.164458	2195	147.234	CRLS1	CRLS1 #0000A8,#FFFFF0	NM_001098951.1
C-	CRTAM.1	430	321	-220	-1.82863	27.2362	23.407	-20.7124	-2.18281	-2.07124e-05	-2.18281	-4.79306	1.64259e-06	5.88969e-05	618	41.4537	CRTAM	CRTAM #0000A8,#FFFFF0	NM_001105457.1
C-	GPSM2.1	171	64	-56.75	-1.8566	10.5246	7.12057	-5.23866	-2.18572	-5.23866e-06	-2.18572	-2.28453	0.0223407	0.14534	215	14.4216	GPSM2	GPSM2 #0000A8,#FFFFF0	XM_591374.5
C-	TH1L.2	261	99	-94.75	-2.04408	18.5267	10.847	-7.89514	-2.18816	-7.89514e-06	-2.18816	-2.17151	0.0298928	0.180187	162	10.8665	TH1L	TH1L #0000A8,#FFFFF0	XM_002701101.1
C-	PIK3C2A.1	745	409	-331.5	-1.83607	56.0034	40.427	-31.8683	-2.18851	-3.18683e-05	-2.18851	-3.46514	0.000529959	0.00783757	1015	68.0833	PIK3C2A	PIK3C2A #0000A8,#FFFFF0	XM_001787474.2
C-	MOSPD2.1	456	327	-195.5	-1.83816	39.0756	24.8953	-18.8891	-2.19067	-1.88891e-05	-2.19067	-2.5103	0.0120627	0.0933348	617	41.3866	MOSPD2	MOSPD2 #0000A8,#FFFFF0	NM_001101896.1
C-	FBXL20.1	336	180	-192.5	-1.81915	32.6652	17.7413	-19.1581	-2.19242	-1.91581e-05	-2.19242	-4.24786	2.1583e-05	0.00056354	531	35.618	FBXL20	FBXL20 #0000A8,#FFFFF0	NM_001035096.1
C-	ASAP2.1	302	247	-144.25	-1.88769	29.9512	14.7576	-13.5022	-2.20255	-1.35022e-05	-2.20255	-2.42444	0.0153318	0.111332	417	27.9712	ASAP2	ASAP2 #0000A8,#FFFFF0	XM_870342.4
C-	VPS13C.1	3276	946	-1120.75	-1.78718	199.31	145.706	-111.006	-2.20804	-0.000111006	-2.20804	-3.58191	0.000341092	0.00553297	3854	258.515	VPS13C	VPS13C #0000A8,#FFFFF0	XM_001251891.3
C-	ZNF187.1	159	97	-68	-1.8	11.4971	7.82261	-6.6488	-2.20958	-6.6488e-06	-2.20958	-3.1659	0.00154607	0.0189499	201	13.4825	ZNF187	ZNF187 #0000A8,#FFFFF0	NM_001101957.1
C-	UTRN.1	3758	1938	-1764.5	-1.92844	270.831	177.631	-162.215	-2.21865	-0.000162215	-2.21865	-3.77235	0.000161718	0.0030425	5360	359.533	UTRN	UTRN #0000A8,#FFFFF0	XM_001788161.2
C-	PIKFYVE.1	954	372	-486.75	-1.88985	72.1864	52.1472	-46.4311	-2.22133	-4.64311e-05	-2.22133	-4.26777	1.97443e-05	0.000519906	1406	94.3104	PIKFYVE	PIKFYVE #0000A8,#FFFFF0	XM_001257235.3
C-	LOC537017.1	1027	591	-458	-1.88119	74.3491	56.7266	-42.9125	-2.22202	-4.29125e-05	-2.22202	-3.51488	0.000439949	0.00679395	1371	91.9627	LOC537017	LOC537017 #0000A8,#FFFFF0	XM_617171.5
C-	EPB41L2.1	1163	332	-457.5	-1.81916	65.9817	57.98	-44.9999	-2.2235	-4.49999e-05	-2.2235	-4.53289	5.81836e-06	0.000176359	1510	101.286	EPB41L2	EPB41L2 #0000A8,#FFFFF0	XM_002684253.1
C-	LOC100335379.1	1112	563	-416.75	-1.86463	72.1297	54.0781	-39.1625	-2.2249	-3.91625e-05	-2.2249	-2.8437	0.00445938	0.0437488	1354	90.8224	LOC100335379	LOC100335379 #0000A8,#FFFFF0	XM_002702798.1
C-	SGOL2.1	435	323	-176.5	-1.8652	37.6088	20.5617	-16.715	-2.22517	-1.6715e-05	-2.22517	-2.28897	0.0220812	0.14407	545	36.557	SGOL2	SGOL2 #0000A8,#FFFFF0	XM_001787931.2
C-	IGF2BP3.1	268	180	-125.25	-1.8883	22.4549	14.5474	-11.75	-2.22536	-1.175e-05	-2.22536	-3.08717	0.00202073	0.0234575	365	24.4831	IGF2BP3	IGF2BP3 #0000A8,#FFFFF0	XM_588560.4
C-	ALDH7A1.1	977	304	-349	-1.90298	59.6729	34.4414	-31.628	-2.22654	-3.1628e-05	-2.22654	-3.12418	0.001783	0.0212555	1243	83.3769	ALDH7A1	ALDH7A1 #0000A8,#FFFFF0	NM_001045969.2
C-	FMO5.1	188	121	-67.75	-1.82371	16.263	8.33775	-6.57635	-2.22657	-6.57635e-06	-2.22657	-2.09771	0.0359311	0.204841	199	13.3483	FMO5	FMO5 #0000A8,#FFFFF0	NM_001101304.1
C-	PGM2L1.1	675	250	-281.5	-1.92599	45.1231	30.2084	-25.4782	-2.2266	-2.54782e-05	-2.2266	-3.79344	0.000148579	0.00285381	921	61.778	PGM2L1	PGM2L1 #0000A8,#FFFFF0	NM_001098984.1
C-	NPR2.1	150	101	-92	-1.83636	14.9694	9.49047	-9.1771	-2.22875	-9.1771e-06	-2.22875	-3.73766	0.000185741	0.00339634	243	16.2997	NPR2	NPR2 #0000A8,#FFFFF0	NM_174126.2
C-	OMG.1	220	136	-84.75	-1.86923	19.8483	9.38933	-8.15293	-2.22942	-8.15293e-06	-2.22942	-2.19492	0.028169	0.172736	230	15.4277	OMG	OMG #0000A8,#FFFFF0	NM_001077524.1
C-	FRMD6.1	424	181	-162	-1.83184	24.9761	22.0256	-15.6235	-2.22983	-1.56235e-05	-2.22983	-3.76543	0.000166267	0.0031059	522	35.0143	FRMD6	FRMD6 #0000A8,#FFFFF0	NM_001102133.1
C-	FARP1.1	363	127	-115	-1.92929	25.4778	12.2733	-10.4506	-2.23317	-1.04506e-05	-2.23317	-2.26368	0.0235941	0.151344	440	29.5139	FARP1	FARP1 #0000A8,#FFFFF0	XM_610432.4
C-	RRM2B.1	273	128	-103.5	-1.8961	16.6523	13.5653	-9.5143	-2.2342	-9.5143e-06	-2.2342	-2.76298	0.00572765	0.0532259	352	23.6111	RRM2B	RRM2B #0000A8,#FFFFF0	XM_607398.4
C-	ZFP62.1	252	203	-103.25	-1.90969	22.8419	13.7163	-9.5906	-2.23941	-9.5906e-06	-2.23941	-2.09466	0.0362009	0.205638	306	20.5256	ZFP62	ZFP62 #0000A8,#FFFFF0	XM_583727.3
C-	GEN1.1	418	214	-134.75	-1.93414	26.9089	19.2418	-12.0311	-2.23957	-1.20311e-05	-2.23957	-2.01124	0.0443007	0.237782	489	32.8007	GEN1	GEN1 #0000A8,#FFFFF0	XM_001253169.2
C-	PCYOX1.1	361	242	-167.25	-1.88375	29.7234	19.6189	-15.8501	-2.23961	-1.58501e-05	-2.23961	-3.06505	0.00217636	0.0249768	491	32.9349	PCYOX1	PCYOX1 #0000A8,#FFFFF0	NM_001105474.1
C-	WDR19.1	987	487	-474.75	-1.87431	72.7471	53.8667	-45.3649	-2.24225	-4.53649e-05	-2.24225	-4.60984	4.02978e-06	0.000126515	1336	89.615	WDR19	WDR19 #0000A8,#FFFFF0	XM_613099.4
C-	ST7L.1	152	79	-59.75	-1.83275	10.3843	8.03988	-5.87314	-2.24924	-5.87314e-06	-2.24924	-2.75504	0.00586849	0.0543677	191	12.8117	ST7L	ST7L #0000A8,#FFFFF0	NM_001083481.1
C-	ARHGAP19.1	108	66	-68.25	-1.89508	10.1611	6.9906	-6.61558	-2.25591	-6.61558e-06	-2.25591	-3.19491	0.00139875	0.0174515	168	11.269	ARHGAP19	ARHGAP19 #0000A8,#FFFFF0	XM_605328.3
C-	LFNG.1	1016	630	-495	-1.87649	62.9702	45.487	-46.8624	-2.26222	-4.68624e-05	-2.26222	-7.49625	6.56789e-14	9.6778e-12	1238	83.0415	LFNG	LFNG #0000A8,#FFFFF0	NM_001046222.1
C-	XPR1.1	603	362	-345	-1.87508	53.4093	31.7895	-33.2896	-2.26324	-3.32896e-05	-2.26324	-5.54735	2.90037e-08	1.59972e-06	804	53.93	XPR1	XPR1 #0000A8,#FFFFF0	XM_616684.5
C-	PKD1L3.1	101	60	-46	-1.92462	7.78288	5.50206	-4.29892	-2.26781	-4.29892e-06	-2.26781	-2.58292	0.00979694	0.0803946	137	9.18957	PKD1L3	PKD1L3 #0000A8,#FFFFF0	XM_002701818.1
C-	EMILIN2.1	8327	3066	-3748.5	-1.87245	555.967	513.486	-364.922	-2.26844	-0.000364922	-2.26844	-3.8006	0.00014435	0.00279655	7762	520.653	EMILIN2	EMILIN2 #0000A8,#FFFFF0	NM_001143869.1
C-	GPR137B.1	1508	862	-713	-1.89545	94.0933	68.7306	-66.7996	-2.2716	-6.67996e-05	-2.2716	-8.51219	1.70721e-17	3.82926e-15	2031	136.234	GPR137B	GPR137B #0000A8,#FFFFF0	XM_002703338.1
C-	GPM6A.1	194	95	-62	-1.73373	16.9323	5.76154	-6.51778	-2.27217	-6.51778e-06	-2.27217	-2.13798	0.0325183	0.191217	161	10.7994	GPM6A	GPM6A #0000A8,#FFFFF0	NM_001075309.1
C-	LOC100335334.1	141	100	-60.5	-1.9272	10.7724	8.81695	-5.73179	-2.275	-5.73179e-06	-2.275	-2.32805	0.0199094	0.133867	193	12.9459	LOC100335334	LOC100335334 #0000A8,#FFFFF0	XM_002700608.1
C-	CCDC23.1	241	138	-123.25	-1.86643	14.5097	13.7485	-11.8773	-2.27737	-1.18773e-05	-2.27737	-4.30316	1.6838e-05	0.000452007	307	20.5927	CCDC23	CCDC23 #0000A8,#FFFFF0	NM_001040575.1
C-	ADD3.1	5153	3017	-2787.25	-1.97252	394.659	291.388	-257.776	-2.27777	-0.000257776	-2.27777	-4.38981	1.13452e-05	0.000315896	7728	518.372	ADD3	ADD3 #0000A8,#FFFFF0	NM_001075194.1
C-	VCL.1	621	264	-272.25	-1.89703	72.0955	26.1028	-27.9689	-2.27793	-2.79689e-05	-2.27793	-2.08909	0.0366998	0.207524	409	27.4345	VCL	VCL #0000A8,#FFFFF0	XM_001790292.1
C-	RCOR3.1	289	178	-155	-1.92125	20.8373	16.6933	-14.6636	-2.28162	-1.46636e-05	-2.28162	-4.7862	1.6997e-06	6.05149e-05	423	28.3736	RCOR3	RCOR3 #0000A8,#FFFFF0	XM_611771.4
C-	LRP12.1	519	384	-328.25	-1.93121	51.6258	26.8505	-30.9618	-2.29029	-3.09618e-05	-2.29029	-4.98725	6.12475e-07	2.46296e-05	769	51.5823	LRP12	LRP12 #0000A8,#FFFFF0	XM_864825.3
C-	CCDC125.1	311	171	-108.25	-1.92719	19.936	13.896	-9.97011	-2.29122	-9.97011e-06	-2.29122	-2.35517	0.0185143	0.12678	359	24.0807	CCDC125	CCDC125 #0000A8,#FFFFF0	XM_593329.4
C-	MEF2A.1	2847	1292	-964.25	-1.9405	172.125	140.842	-87.3971	-2.29262	-8.73971e-05	-2.29262	-2.31977	0.0203534	0.136051	3380	226.721	MEF2A	MEF2A #0000A8,#FFFFF0	NM_001083638.1
C-	DBN1.1	395	284	-255.75	-1.93085	50.2809	20.1128	-24.7956	-2.29706	-2.47956e-05	-2.29706	-3.29201	0.000994731	0.0131418	573	38.4352	DBN1	DBN1 #0000A8,#FFFFF0	NM_001045917.1
C-	LOC781439.1	50	17	-25.5	-1.89474	4.73002	2.06841	-2.5234	-2.3008	-2.5234e-06	-2.3008	-1.99443	0.0461048	0.24456	49	3.28678	LOC781439	LOC781439 #0000A8,#FFFFF0	XM_001790479.2
C-	BMPR2.1	696	515	-420	-1.93698	66.9256	39.7095	-40.2704	-2.30089	-4.02704e-05	-2.30089	-4.22178	2.42389e-05	0.000624917	1058	70.9676	BMPR2	BMPR2 #0000A8,#FFFFF0	XM_617592.5
C-	MAGEF1.1	225	77	-111.75	-1.86127	15.2335	11.1638	-11.047	-2.30562	-1.1047e-05	-2.30562	-4.1777	2.94475e-05	0.000734805	293	19.6536	MAGEF1	MAGEF1 #0000A8,#FFFFF0	NM_001102049.1
C-	TGDS.1	754	415	-263.5	-1.94784	49.4645	37.3216	-24.1087	-2.31217	-2.41087e-05	-2.31217	-2.17642	0.0295238	0.178763	882	59.162	TGDS	TGDS #0000A8,#FFFFF0	NM_001101159.1
C-	PTPLA.1	78	56	-40	-1.92486	6.41314	4.02389	-3.77166	-2.31529	-3.77166e-06	-2.31529	-2.44651	0.0144245	0.106701	105	7.0431	PTPLA	PTPLA #0000A8,#FFFFF0	XM_866930.3
C-	BCL2L2.1	306	92	-123	-2.03361	20.5265	7.88452	-10.7565	-2.31541	-1.07565e-05	-2.31541	-3.61414	0.000301345	0.00506095	398	26.6967	BCL2L2	BCL2L2 #0000A8,#FFFFF0	NM_001076533.1
C-	EVI5.1	211	106	-111	-1.97155	14.6157	11.2916	-10.3521	-2.31911	-1.03521e-05	-2.31911	-4.05675	4.97612e-05	0.00112915	300	20.1231	EVI5	EVI5 #0000A8,#FFFFF0	XM_616848.4
C-	LOC789338.1	135	77	-61.5	-1.96094	10.4376	6.84786	-5.74536	-2.32547	-5.74536e-06	-2.32547	-3.02656	0.00247356	0.0275725	172	11.5373	LOC789338	LOC789338 #0000A8,#FFFFF0	XM_001256121.2
C-	CCDC66.1	373	250	-157.5	-1.97072	29.3923	19.8263	-14.4896	-2.32672	-1.44896e-05	-2.32672	-2.6197	0.0088008	0.0740875	467	31.325	CCDC66	CCDC66 #0000A8,#FFFFF0	XM_614308.5
C-	LOC527796.1	68	42	-39	-1.95706	7.31923	3.89872	-3.76992	-2.32729	-3.76992e-06	-2.32729	-2.45264	0.0141811	0.105492	74	4.96371	LOC527796	LOC527796 #0000A8,#FFFFF0	XM_606198.4
C-	OSBPL6.1	368	244	-169	-2.02424	30.6045	20.2375	-15.5793	-2.32761	-1.55793e-05	-2.32761	-2.67589	0.00745322	0.0649927	487	32.6666	OSBPL6	OSBPL6 #0000A8,#FFFFF0	XM_001251342.2
C-	TIMP2.1	5355	3812	-2552.25	-1.92398	365.027	325.774	-242.228	-2.32765	-0.000242228	-2.32765	-3.63588	0.000277038	0.00475559	6542	438.819	TIMP2	TIMP2 #0000A8,#FFFFF0	NM_174472.3
C-	EBI2.1	81	33	-32	-1.94118	4.80562	4.16688	-2.99993	-2.33186	-2.99993e-06	-2.33186	-2.19014	0.0285139	0.174395	100	6.70771	EBI2	EBI2 #0000A8,#FFFFF0	NM_001105442.1
C-	TMEM71.1	387	177	-195.75	-1.98739	25.0762	20.6205	-18.0004	-2.33259	-1.80004e-05	-2.33259	-5.36579	8.05975e-08	3.95869e-06	538	36.0875	TMEM71	TMEM71 #0000A8,#FFFFF0	XM_864333.3
C-	ZNF248.1	172	83	-71.5	-1.99652	10.9891	9.2302	-6.506	-2.33803	-6.506e-06	-2.33803	-2.85814	0.00426128	0.042313	224	15.0253	ZNF248	ZNF248 #0000A8,#FFFFF0	XM_002703343.1
C-	CAPRIN2.1	145	97	-72.75	-1.95724	13.8005	6.6378	-6.95346	-2.33981	-6.95346e-06	-2.33981	-2.81593	0.0048637	0.0467541	186	12.4763	CAPRIN2	CAPRIN2 #0000A8,#FFFFF0	XM_871851.2
C-	GALM.1	184	60	-77	-1.9625	11.2116	7.38144	-7.15366	-2.34286	-7.15366e-06	-2.34286	-3.39041	0.000697882	0.00983808	237	15.8973	GALM	GALM #0000A8,#FFFFF0	NM_001034795.1
C-	B4GALT6.1	98	44	-49.25	-1.95169	8.90045	4.39231	-4.75519	-2.34398	-4.75519e-06	-2.34398	-2.76491	0.00569394	0.0530427	100	6.70771	B4GALT6	B4GALT6 #0000A8,#FFFFF0	XM_602784.4
C-	QKI.1	1365	769	-782.25	-1.97873	113.202	85.7175	-73.9745	-2.34796	-7.39745e-05	-2.34796	-5.43639	5.4374e-08	2.75791e-06	2053	137.709	QKI	QKI #0000A8,#FFFFF0	NM_001007817.1
C-	HNMT.1	729	462	-269.25	-1.96505	62.9559	31.6028	-25.2122	-2.3488	-2.52122e-05	-2.3488	-1.96763	0.0491104	0.255579	678	45.4783	HNMT	HNMT #0000A8,#FFFFF0	NM_001035434.1
C-	CYB5A.1	262	138	-94.25	-1.93086	17.5942	13.3951	-8.89476	-2.34953	-8.89476e-06	-2.34953	-2.45949	0.0139133	0.104373	306	20.5256	CYB5A	CYB5A #0000A8,#FFFFF0	NM_174033.3
C-	SLC38A9.1	468	111	-167	-1.97661	28.8627	15.2468	-15.3695	-2.35239	-1.53695e-05	-2.35239	-3.27135	0.00107036	0.0139762	570	38.234	SLC38A9	SLC38A9 #0000A8,#FFFFF0	NM_001102163.1
C-	OSBPL8.1	2255	1904	-1271.5	-1.99278	231.38	109.755	-120.297	-2.3529	-0.000120297	-2.3529	-3.35404	0.000796404	0.0110352	3213	215.519	OSBPL8	OSBPL8 #0000A8,#FFFFF0	XM_002704211.1
C-	FBXO44.1	194	110	-82.25	-1.90634	12.8465	7.01376	-7.88471	-2.35801	-7.88471e-06	-2.35801	-3.57138	0.000355112	0.0057164	198	13.2813	FBXO44	FBXO44 #0000A8,#FFFFF0	NM_001101295.1
C-	C6H4orf34.1	714	530	-341.5	-1.94598	60.8892	39.5496	-32.6941	-2.35815	-3.26941e-05	-2.35815	-3.0711	0.00213272	0.0245597	950	63.7233	C6H4orf34	C6H4orf34 #0000A8,#FFFFF0	NM_001046543.1
C-	IL8RB (NC_007300 110592309..110594255).1	178	115	-92.75	-2.01923	12.6383	8.1396	-8.44704	-2.36152	-8.44704e-06	-2.36152	-3.69938	0.000216129	0.00384066	213	14.2874	IL8RB (NC_007300 110592309..110594255)	IL8RB (NC_007300 110592309..110594255) #0000A8,#FFFFF0	NM_174360.2
C-	FUCA2.1	580	290	-300.5	-1.96391	35.536	31.4805	-28.3662	-2.36416	-2.83662e-05	-2.36416	-6.78319	1.17564e-11	1.22897e-09	790	52.9909	FUCA2	FUCA2 #0000A8,#FFFFF0	XM_593801.4
C-	TMTC3.1	122	78	-49.5	-1.94286	10.6192	5.3995	-4.76451	-2.3652	-4.76451e-06	-2.3652	-2.18146	0.0291491	0.177224	137	9.18957	TMTC3	TMTC3 #0000A8,#FFFFF0	XM_600406.5
C-	EFCAB7.1	99	66	-38.75	-1.95679	7.66721	4.24784	-3.65115	-2.36604	-3.65115e-06	-2.36604	-2.30874	0.0209582	0.138807	116	7.78095	EFCAB7	EFCAB7 #0000A8,#FFFFF0	XM_581406.3
C-	EFNA1.1	82	48	-39.5	-1.9875	5.46095	4.50215	-3.69042	-2.37418	-3.69042e-06	-2.37418	-2.45193	0.0142094	0.105613	110	7.37848	EFNA1	EFNA1 #0000A8,#FFFFF0	NM_001034292.1
C-	LOC613929.1	59	37	-33.25	-2.03101	7.05117	2.05045	-3.18919	-2.37425	-3.18919e-06	-2.37425	-2.27938	0.0226447	0.146845	71	4.76248	LOC613929	LOC613929 #0000A8,#FFFFF0	XM_001788306.2
C-	LSR.1	60	39	-25.25	-1.9619	6.15928	3.25796	-2.50289	-2.38206	-2.50289e-06	-2.38206	-2.00186	0.0453002	0.241797	38	2.54893	LSR	LSR #0000A8,#FFFFF0	NM_001083394.1
C-	LOC511583.1	316	173	-163	-1.97168	22.7277	16.9761	-15.2661	-2.38641	-1.52661e-05	-2.38641	-4.98105	6.32405e-07	2.53805e-05	417	27.9712	LOC511583	LOC511583 #0000A8,#FFFFF0	XM_588946.5
C-	LOC505349.1	94	67	-41.75	-2.05031	6.67021	3.85206	-3.66058	-2.39169	-3.66058e-06	-2.39169	-2.45115	0.0142402	0.105764	101	6.77479	LOC505349	LOC505349 #0000A8,#FFFFF0	XM_002704179.1
C-	TPD52.1	1330	718	-582.25	-1.98063	89.9432	76.1671	-54.9891	-2.39235	-5.49891e-05	-2.39235	-3.55057	0.000384405	0.00607673	1699	113.964	TPD52	TPD52 #0000A8,#FFFFF0	NM_001076922.1
C-	LTBP1 (NC_007309 16734394..16778599).1	135	104	-87.5	-2.05105	12.7314	9.02903	-8.14967	-2.39357	-8.14967e-06	-2.39357	-3.6588	0.000253398	0.00442122	211	14.1533	LTBP1 (NC_007309 16734394..16778599)	LTBP1 (NC_007309 16734394..16778599) #0000A8,#FFFFF0	NM_001103091.1
C-	DHX40.1	1065	481	-409.75	-1.98438	63.7738	57.9406	-38.4179	-2.39594	-3.84179e-05	-2.39594	-3.05119	0.0022794	0.0258217	1289	86.4624	DHX40	DHX40 #0000A8,#FFFFF0	NM_001076897.1
C-	STX12.1	856	507	-393	-1.98311	61.2271	42.7521	-36.8311	-2.39867	-3.68311e-05	-2.39867	-3.93258	8.40414e-05	0.0017599	1078	72.3091	STX12	STX12 #0000A8,#FFFFF0	NM_001101053.1
C-	ZNF175.1	318	117	-104.75	-2.01699	19.7396	13.1803	-9.3996	-2.39912	-9.3996e-06	-2.39912	-2.36467	0.0180464	0.124761	363	24.349	ZNF175	ZNF175 #0000A8,#FFFFF0	XM_001790619.1
C-	TMEM184C.1	990	612	-448.75	-1.97185	76.0553	48.306	-42.8968	-2.40476	-4.28968e-05	-2.40476	-3.64543	0.000266947	0.00462166	1233	82.7061	TMEM184C	TMEM184C #0000A8,#FFFFF0	NM_001075180.1
C-	STK17B.1	2493	1542	-1115.5	-2.01779	190.547	139.684	-103.779	-2.41369	-0.000103779	-2.41369	-3.15715	0.00159322	0.0193952	3156	211.695	STK17B	STK17B #0000A8,#FFFFF0	NM_001038080.1
C-	ENAH.1	171	100	-75.75	-2.09386	12.8462	9.8021	-6.82314	-2.41729	-6.82314e-06	-2.41729	-2.9567	0.00310956	0.0330731	217	14.5557	ENAH	ENAH #0000A8,#FFFFF0	XM_590728.4
C-	SNX5.1	5603	1312	-2219.5	-2.05015	354.641	191.211	-202.219	-2.42432	-0.000202219	-2.42432	-4.12786	3.66158e-05	0.000884165	7086	475.308	SNX5	SNX5 #0000A8,#FFFFF0	NM_001034464.1
C-	SGCB.1	110	93	-53.75	-2.11979	10.4012	6.21182	-4.83767	-2.43229	-4.83767e-06	-2.43229	-2.57819	0.00993198	0.0811728	143	9.59203	SGCB	SGCB #0000A8,#FFFFF0	NM_001102188.1
C-	TMEM145.1	74	47	-39	-1.99363	6.85227	4.43904	-3.79462	-2.43689	-3.79462e-06	-2.43689	-2.5191	0.0117657	0.0917749	72	4.82955	TMEM145	TMEM145 #0000A8,#FFFFF0	NM_001110441.1
C-	CSGALNACT2.1	1254	971	-659	-2.0821	110.233	74.1202	-60.3098	-2.43793	-6.03098e-05	-2.43793	-3.40116	0.000671004	0.00951902	1758	117.922	CSGALNACT2	CSGALNACT2 #0000A8,#FFFFF0	XM_586267.4
C-	OSBPL11.1	1172	828	-725.25	-2.05261	103.661	63.0586	-67.574	-2.43802	-6.7574e-05	-2.43802	-6.23072	4.64325e-10	3.60513e-08	1729	115.976	OSBPL11	OSBPL11 #0000A8,#FFFFF0	XM_865427.4
C-	KRBA2.1	59	43	-39.25	-2.14599	5.73616	2.94907	-3.54868	-2.44035	-3.54868e-06	-2.44035	-2.43779	0.0147773	0.108515	84	5.63448	KRBA2	KRBA2 #0000A8,#FFFFF0	XM_002702148.1
C-	GPR177.1	411	204	-257.75	-2.05527	40.7172	25.071	-24.4048	-2.44198	-2.44048e-05	-2.44198	-5.32111	1.03138e-07	4.93376e-06	582	39.0389	GPR177	GPR177 #0000A8,#FFFFF0	XM_606535.4
C-	LOC100270756.1	1145	708	-581	-1.98978	97.5529	51.7743	-55.2198	-2.45097	-5.52198e-05	-2.45097	-3.88233	0.000103461	0.00209275	1310	87.871	LOC100270756	LOC100270756 #0000A8,#FFFFF0	NM_001145202.1
C-	SDCCAG8.1	179	85	-78.5	-2.08276	11.2261	9.12085	-7.05815	-2.45273	-7.05815e-06	-2.45273	-3.44658	0.000567731	0.00832906	222	14.8911	SDCCAG8	SDCCAG8 #0000A8,#FFFFF0	XM_868341.3
C-	ALS2CR13.1	664	421	-340	-2.09149	52.8318	35.9837	-31.0382	-2.45493	-3.10382e-05	-2.45493	-3.78871	0.000151432	0.00289758	906	60.7719	ALS2CR13	ALS2CR13 #0000A8,#FFFFF0	XM_866583.4
C-	TDRD6.1	72	32	-25.75	-2.09574	4.51603	3.41363	-2.28891	-2.45957	-2.28891e-06	-2.45957	-1.96538	0.0493705	0.256668	86	5.76863	TDRD6	TDRD6 #0000A8,#FFFFF0	XM_590269.3
C-	TRIM2.1	72	59	-50.25	-2.03608	6.79444	4.95142	-4.78016	-2.46197	-4.78016e-06	-2.46197	-2.84158	0.00448905	0.0438748	107	7.17725	TRIM2	TRIM2 #0000A8,#FFFFF0	NM_001083735.1
C-	AKAP5.1	348	269	-161.5	-2.10616	31.0201	19.8782	-14.8317	-2.47893	-1.48317e-05	-2.47893	-2.63697	0.00836515	0.071102	440	29.5139	AKAP5	AKAP5 #0000A8,#FFFFF0	NM_174236.1
C-	SLC31A1.1	3580	1161	-1255.25	-2.10134	227.162	123.861	-112.784	-2.4852	-0.000112784	-2.4852	-2.70931	0.00674236	0.0604387	4418	296.347	SLC31A1	SLC31A1 #0000A8,#FFFFF0	NM_001100381.1
C-	MAP2K6.1	186	79	-81.75	-2.10847	11.4536	9.56119	-7.33341	-2.48759	-7.33341e-06	-2.48759	-3.53724	0.000404336	0.00633601	233	15.629	MAP2K6	MAP2K6 #0000A8,#FFFFF0	NM_001034045.1
C-	THUMPD2.1	283	235	-119.25	-2.13033	26.6787	15.5444	-10.8262	-2.48825	-1.08262e-05	-2.48825	-1.96197	0.0497659	0.257794	339	22.7391	THUMPD2	THUMPD2 #0000A8,#FFFFF0	XM_586422.3
C-	NAALADL1.1	151	116	-97.5	-2.14706	13.5544	8.07814	-8.85225	-2.50642	-8.85225e-06	-2.50642	-3.90033	9.60645e-05	0.00195884	209	14.0191	NAALADL1	NAALADL1 #0000A8,#FFFFF0	NM_001100308.1
C-	GXYLT1.1	164	72	-69.25	-1.97193	11.7432	7.59991	-6.84178	-2.50835	-6.84178e-06	-2.50835	-3.43017	0.000603197	0.00874765	188	12.6105	GXYLT1	GXYLT1 #0000A8,#FFFFF0	XM_869884.3
C-	VEGFA.1	2428	1225	-952.75	-2.32097	172.371	84.5398	-77.8628	-2.51626	-7.78628e-05	-2.51626	-2.61257	0.00898639	0.0752326	2060	138.179	VEGFA	VEGFA #0000A8,#FFFFF0	NM_174216.1
C-	ZNF529.1	88	49	-35.75	-2.28829	6.27511	4.74487	-3.03696	-2.52879	-3.03696e-06	-2.52879	-2.1704	0.0299768	0.180424	106	7.11017	ZNF529	ZNF529 #0000A8,#FFFFF0	XM_587640.4
C-	IDH1.1	993	413	-425.25	-2.11468	59.7495	48.5941	-38.8143	-2.53482	-3.88143e-05	-2.53482	-4.53848	5.66625e-06	0.000172007	1193	80.023	IDH1	IDH1 #0000A8,#FFFFF0	NM_181012.3
C-	S100B.1	58	34	-28	-2.10891	4.27479	3.22927	-2.61136	-2.53664	-2.61136e-06	-2.53664	-2.13037	0.0331412	0.193486	74	4.96371	S100B	S100B #0000A8,#FFFFF0	NM_001034555.2
C-	IPMK.1	294	196	-145.25	-2.08194	24.1865	16.5506	-13.6132	-2.53917	-1.36132e-05	-2.53917	-3.47078	0.000518962	0.00772018	374	25.0868	IPMK	IPMK #0000A8,#FFFFF0	NM_001035462.1
C-	SAP30.1	193	106	-78.5	-2.02951	14.6382	9.01988	-7.46096	-2.54107	-7.46096e-06	-2.54107	-3.34697	0.000817002	0.011281	213	14.2874	SAP30	SAP30 #0000A8,#FFFFF0	XM_001249429.3
C-	ZNF454.1	90	54	-41.75	-2.16783	5.99349	5.0659	-3.66874	-2.54639	-3.66874e-06	-2.54639	-2.52962	0.0114185	0.089866	110	7.37848	ZNF454	ZNF454 #0000A8,#FFFFF0	XM_604301.4
C-	ZFP2.1	69	54	-35.25	-2.23684	6.16085	3.77984	-3.10477	-2.54847	-3.10477e-06	-2.54847	-2.32797	0.0199139	0.133867	93	6.23817	ZFP2	ZFP2 #0000A8,#FFFFF0	NM_001098146.1
C-	HTR3E.1	98	30	-42.75	-2.22143	6.62749	3.96994	-3.82958	-2.55121	-3.82958e-06	-2.55121	-2.58674	0.00968876	0.0796688	117	7.84802	HTR3E	HTR3E #0000A8,#FFFFF0	XM_868063.3
C-	LOC783944.2	179	88	-89.75	-2.11838	10.8405	9.74777	-8.28921	-2.55167	-8.28921e-06	-2.55167	-3.80603	0.000141215	0.00274106	237	15.8973	LOC783944	LOC783944 #0000A8,#FFFFF0	XM_001789603.2
C-	RNF130.1	3903	1421	-1588	-2.13368	234.657	171.568	-143.951	-2.55945	-0.000143951	-2.55945	-4.08748	4.36086e-05	0.00101772	4690	314.592	RNF130	RNF130 #0000A8,#FFFFF0	NM_001099708.1
C-	EFHA2.1	79	44	-35	-2.12	6.80038	2.82706	-3.21707	-2.56344	-3.21707e-06	-2.56344	-2.24907	0.0245081	0.155459	74	4.96371	EFHA2	EFHA2 #0000A8,#FFFFF0	XM_616557.4
C-	ACRC.1	384	268	-162	-2.17604	34.7035	15.642	-14.6447	-2.56927	-1.46447e-05	-2.56927	-2.29764	0.0215821	0.141684	396	26.5625	ACRC	ACRC #0000A8,#FFFFF0	XM_605075.3
C-	SEPSECS.1	74	57	-42.25	-2.0974	4.85048	3.86401	-3.94713	-2.57602	-3.94713e-06	-2.57602	-2.63787	0.008343	0.0709735	102	6.84187	SEPSECS	SEPSECS #0000A8,#FFFFF0	XM_597076.5
C-	LOC788312.1	56	23	-27.75	-2.08824	4.12695	3.09228	-2.6752	-2.57794	-2.6752e-06	-2.57794	-2.17239	0.0298263	0.179971	71	4.76248	LOC788312	LOC788312 #0000A8,#FFFFF0	XM_001255411.2
C-	AGTPBP1.1	186	150	-79	-2.13262	16.1526	10.2746	-7.40185	-2.5819	-7.40185e-06	-2.5819	-2.20206	0.0276613	0.170347	222	14.8911	AGTPBP1	AGTPBP1 #0000A8,#FFFFF0	XM_001252536.3
C-	CRTAP.1	138	77	-78.75	-2.19772	9.20139	7.55967	-7.15009	-2.59089	-7.15009e-06	-2.59089	-3.55964	0.000371361	0.00594502	186	12.4763	CRTAP	CRTAP #0000A8,#FFFFF0	XM_613708.4
C-	SMC5.1	2821	1991	-1178.75	-2.23365	223.15	167.411	-104.734	-2.59408	-0.000104734	-2.59408	-2.23408	0.0254779	0.159992	3438	230.611	SMC5	SMC5 #0000A8,#FFFFF0	XM_585794.5
C-	LOC540312.1	223	141	-91.25	-2.24573	17.026	12.318	-8.11941	-2.59845	-8.11941e-06	-2.59845	-2.33008	0.0198019	0.133336	266	17.8425	LOC540312	LOC540312 #0000A8,#FFFFF0	XM_865657.3
C-	SALL2.1	73	52	-39.5	-2.23438	6.32629	4.04815	-3.55007	-2.61011	-3.55007e-06	-2.61011	-2.51661	0.0118489	0.0922035	97	6.50648	SALL2	SALL2 #0000A8,#FFFFF0	NM_001102112.1
C-	TLR7.1	1793	951	-811.75	-2.16089	122.943	89.452	-75.6861	-2.61322	-7.56861e-05	-2.61322	-3.70123	0.000214559	0.00382132	2183	146.429	TLR7	TLR7 #0000A8,#FFFFF0	NM_001033761.1
C-	LOC521270.1	143	56	-51	-2.31613	9.48448	5.18173	-4.27958	-2.61447	-4.27958e-06	-2.61447	-2.10613	0.0351929	0.201886	173	11.6043	LOC521270	LOC521270 #0000A8,#FFFFF0	XM_599530.5
C-	ALG13.1	123	48	-48.25	-2.24516	8.19523	5.38845	-4.27365	-2.61493	-4.27365e-06	-2.61493	-2.76349	0.00571875	0.0531969	145	9.72618	ALG13	ALG13 #0000A8,#FFFFF0	NM_001080275.1
C-	CCL16.1	92	36	-46.5	-2.20779	5.99232	4.61138	-4.23189	-2.61694	-4.23189e-06	-2.61694	-2.7509	0.00594318	0.0548081	117	7.84802	CCL16	CCL16 #0000A8,#FFFFF0	XM_868834.2
C-	KPNA5.1	81	76	-36.25	-2.31818	7.77462	4.66636	-3.17967	-2.63877	-3.17967e-06	-2.63877	-1.96231	0.0497262	0.257656	94	6.30525	KPNA5	KPNA5 #0000A8,#FFFFF0	XM_001252155.2
C-	CNNM2.2	155	83	-79.25	-2.268	13.9924	7.49912	-7.28527	-2.66496	-7.28527e-06	-2.66496	-3.6385	0.000274233	0.00472351	184	12.3422	CNNM2	CNNM2 #0000A8,#FFFFF0	XM_001251344.2
C-	REV3L.1	3074	1417	-1253.5	-2.3233	206.502	142.592	-109.536	-2.68381	-0.000109536	-2.68381	-3.03631	0.00239494	0.0268443	3746	251.271	REV3L	REV3L #0000A8,#FFFFF0	XM_865801.3
C-	PDK1.1	2640	1339	-1154.5	-2.26486	157.993	142.12	-101.398	-2.68777	-0.000101398	-2.68777	-3.55122	0.000383448	0.00607245	3180	213.305	PDK1	PDK1 #0000A8,#FFFFF0	XM_607085.4
C-	ARHGEF10L.1	269	205	-127.75	-2.22837	26.7398	17.1522	-11.8987	-2.69041	-1.18987e-05	-2.69041	-2.09591	0.03609	0.205225	258	17.3059	ARHGEF10L	ARHGEF10L #0000A8,#FFFFF0	NM_001046297.1
C-	ZNF283.1	496	233	-178.25	-2.33271	32.5578	21.0271	-15.2997	-2.69078	-1.52997e-05	-2.69078	-2.3469	0.0189303	0.128973	558	37.429	ZNF283	ZNF283 #0000A8,#FFFFF0	XM_596152.3
C-	TRPC1.1	49	39	-26.75	-2.32099	4.89195	2.28694	-2.42364	-2.704	-2.42364e-06	-2.704	-2.11186	0.0346987	0.19979	57	3.8234	TRPC1	TRPC1 #0000A8,#FFFFF0	NM_174476.2
C-	PRKRA.1	170	113	-74	-2.27586	12.6142	10.1364	-6.67072	-2.71431	-6.67072e-06	-2.71431	-2.68506	0.00725164	0.0637777	199	13.3483	PRKRA	PRKRA #0000A8,#FFFFF0	NM_001045870.1
C-	LACTB (NC_007308 47246248..47264377).1	637	419	-322.5	-2.24277	50.5708	32.511	-29.1434	-2.72129	-2.91434e-05	-2.72129	-3.96413	7.36666e-05	0.00158035	749	50.2408	LACTB (NC_007308 47246248..47264377)	LACTB (NC_007308 47246248..47264377) #0000A8,#FFFFF0	NM_001099133.1
C-	N4BP2.1	1271	923	-696.75	-2.31091	103.896	73.0621	-62.5885	-2.7213	-6.25885e-05	-2.7213	-3.96375	7.37839e-05	0.00158118	1704	114.299	N4BP2	N4BP2 #0000A8,#FFFFF0	XM_587938.4
C-	AQP9.1	555	345	-298.5	-2.29642	56.2522	28.4038	-28.0141	-2.73365	-2.80141e-05	-2.73365	-3.28566	0.00101744	0.0133832	401	26.8979	AQP9	AQP9 #0000A7,#FFFFF0	XM_594921.4
C-	LOC782402.1	66	38	-28	-2.12	6.05106	4.86236	-2.93225	-2.757	-2.93225e-06	-2.757	-2.09264	0.036381	0.206299	23	1.54277	LOC782402	LOC782402 #0000A7,#FFFFF0	XM_001250069.3
C-	DEFB7.1	605	95	-175.5	-2.18182	42.5921	15.9534	-16.3145	-2.76009	-1.63145e-05	-2.76009	-2.22521	0.0260672	0.162737	218	14.6228	DEFB7	DEFB7 #0000A7,#FFFFF0	NM_001102362.2
C-	RUFY2.1	117	59	-47.25	-2.30345	7.24701	5.86819	-4.16779	-2.76788	-4.16779e-06	-2.76788	-2.78105	0.00541841	0.0510174	134	8.98833	RUFY2	RUFY2 #0000A7,#FFFFF0	XM_864141.4
C-	DECR1.1	280	197	-130.25	-2.31566	22.2097	15.0522	-11.6435	-2.76965	-1.16435e-05	-2.76965	-3.00624	0.00264502	0.0291457	324	21.733	DECR1	DECR1 #0000A7,#FFFFF0	NM_001075423.1
C-	CCDC112.1	384	130	-139.5	-2.31604	23.9192	13.7992	-12.3647	-2.7699	-1.23647e-05	-2.7699	-2.8871	0.00388812	0.0395453	436	29.2456	CCDC112	CCDC112 #0000A7,#FFFFF0	XM_586889.5
C-	AP1S2.1	1322	1021	-618.5	-2.33011	115.918	72.4324	-56.0261	-2.78201	-5.60261e-05	-2.78201	-2.59598	0.0094323	0.0780368	1574	105.579	AP1S2	AP1S2 #0000A7,#FFFFF0	NM_001040591.1
C-	RIT1.1	3653	2583	-1697.25	-2.28799	293.661	194.806	-154.342	-2.79043	-0.000154342	-2.79043	-2.98065	0.00287637	0.031051	4312	289.237	RIT1	RIT1 #0000A7,#FFFFF0	NM_001098078.1
C-	PLEKHA5.1	81	58	-54.25	-2.49655	8.20635	4.28396	-4.76185	-2.79344	-4.76185e-06	-2.79344	-3.00086	0.00269219	0.0295698	89	5.96986	PLEKHA5	PLEKHA5 #0000A7,#FFFFF0	XM_612103.5
C-	SMOX.1	43	35	-25.75	-2.32051	4.49654	2.54509	-2.37173	-2.80324	-2.37173e-06	-2.80324	-2.12086	0.0339333	0.196617	58	3.89047	SMOX	SMOX #0000A7,#FFFFF0	XM_001252063.2
C-	LOC516512.1	183	113	-92	-2.32852	12.4227	10.6135	-8.44921	-2.82689	-8.44921e-06	-2.82689	-3.73966	0.000184271	0.00337556	230	15.4277	LOC516512	LOC516512 #0000A7,#FFFFF0	XM_594667.5
C-	PLA2G7.1	1879	1137	-815	-2.3606	134.013	96.0311	-72.4591	-2.83087	-7.24591e-05	-2.83087	-2.98166	0.00286691	0.0309654	2125	142.539	PLA2G7	PLA2G7 #0000A7,#FFFFF0	NM_174578.3
C-	ZNF10.1	100	62	-49	-2.48485	7.1477	5.38659	-4.28721	-2.84477	-4.28721e-06	-2.84477	-2.8685	0.00412424	0.0412977	128	8.58587	ZNF10	ZNF10 #0000A7,#FFFFF0	XM_002701689.1
C-	CCDC18.1	71	36	-30.75	-2.46429	4.61887	3.65538	-2.64633	-2.86604	-2.64633e-06	-2.86604	-2.26037	0.0237982	0.152271	82	5.50032	CCDC18	CCDC18 #0000A7,#FFFFF0	XM_001787654.1
C-	APOE.1	95	79	-44.25	-2.21233	10.0281	5.49317	-4.30022	-2.86915	-4.30022e-06	-2.86915	-1.99718	0.0458061	0.243724	94	6.30525	APOE	APOE #0000A7,#FFFFF0	NM_173991.2
C-	ADORA3.2	195	118	-104.25	-2.29907	14.1054	9.77287	-9.53335	-2.8809	-9.53335e-06	-2.8809	-4.29905	1.71535e-05	0.000459229	228	15.2936	ADORA3	ADORA3 #0000A7,#FFFFF0	NM_001104611.1
C-	TMEM67.1	92	75	-44.75	-2.37692	8.40869	4.9555	-4.13139	-2.88581	-4.13139e-06	-2.88581	-2.29615	0.0216674	0.142059	109	7.31141	TMEM67	TMEM67 #0000A7,#FFFFF0	XM_583257.4
C-	ZFP30.1	241	186	-100.75	-2.53817	19.0594	14.7514	-8.5855	-2.89965	-8.5855e-06	-2.89965	-1.99647	0.0458824	0.244001	281	18.8487	ZFP30	ZFP30 #0000A7,#FFFFF0	NM_001102539.1
C-	LOC511229.1	3386	1822	-1548	-2.48311	220.183	192.741	-134.71	-2.90384	-0.00013471	-2.90384	-3.61995	0.000294662	0.00496523	4071	273.071	LOC511229	LOC511229 #0000A7,#FFFFF0	XM_588526.5
C-	LOC785366.1	1639	1372	-1005.25	-2.53006	167.413	79.1916	-89.7503	-2.9311	-8.97503e-05	-2.9311	-3.87194	0.000107972	0.00217746	1993	133.685	LOC785366	LOC785366 #0000A7,#FFFFF0	XM_001253420.2
C-	LOC616956.1	53	31	-30.5	-2.45238	5.02774	2.41655	-2.76942	-2.93507	-2.76942e-06	-2.93507	-2.33398	0.0195968	0.132348	63	4.22586	LOC616956	LOC616956 #0000A7,#FFFFF0	XM_001790506.2
C-	ZNF345.1	66	45	-29.5	-2.49367	5.11183	3.42766	-2.57936	-2.94298	-2.57936e-06	-2.94298	-2.2548	0.0241458	0.153861	76	5.09786	ZNF345	ZNF345 #0000A7,#FFFFF0	NM_001035327.1
C-	SCG5.1	158	87	-67.5	-2.46739	10.3523	8.49377	-6.00859	-2.94927	-6.00859e-06	-2.94927	-3.07185	0.00212737	0.0245121	182	12.208	SCG5	SCG5 #0000A7,#FFFFF0	NM_001045998.1
C-	ZNF382.2	135	23	-45.75	-2.63393	8.97666	2.52588	-3.73553	-2.95713	-3.73553e-06	-2.95713	-2.1555	0.031123	0.185006	154	10.3299	ZNF382	ZNF382 #0000A7,#FFFFF0	XM_002701862.1
C-	LOC100335220.1	68	29	-28.25	-2.48684	4.34912	2.92479	-2.44247	-3.0036	-2.44247e-06	-3.0036	-2.21119	0.027023	0.167489	74	4.96371	LOC100335220	LOC100335220 #0000A7,#FFFFF0	XM_002703555.1
C-	LOC617386.1	71	50	-37.25	-2.52041	4.54543	4.10499	-3.27367	-3.02077	-3.27367e-06	-3.02077	-2.56538	0.0103062	0.0832203	89	5.96986	LOC617386	LOC617386 #0000A7,#FFFFF0	XM_001788491.2
C-	CALD1.1	43	34	-27.25	-2.67692	4.7479	2.80065	-2.44012	-3.04866	-2.44012e-06	-3.04866	-2.22237	0.0262586	0.163555	38	2.54893	CALD1	CALD1 #0000A7,#FFFFF0	NM_174258.2
C-	CCDC88A.1	1112	879	-636.25	-2.60164	101.376	62.0612	-56.566	-3.10281	-5.6566e-05	-3.10281	-3.7511	0.000176061	0.0032458	1336	89.615	CCDC88A	CCDC88A #0000A7,#FFFFF0	XM_867336.4
C-	C1QC.1	207	137	-103.75	-2.69388	15.3914	9.00174	-8.88325	-3.12168	-8.88325e-06	-3.12168	-3.70076	0.000214957	0.00382321	189	12.6776	C1QC	C1QC #0000A7,#FFFFF0	XM_587039.4
C-	CD302.1	638	515	-276.25	-2.56294	55.5897	35.0898	-24.6343	-3.12277	-2.46343e-05	-3.12277	-2.09468	0.0361993	0.205638	707	47.4235	CD302	CD302 #0000A7,#FFFFF0	NM_001110191.1
C-	AGPHD1.1	43	27	-22.75	-2.65455	4.11092	1.82842	-2.02711	-3.13819	-2.02711e-06	-3.13819	-2.04685	0.0406725	0.222931	40	2.68308	AGPHD1	AGPHD1 #0000A7,#FFFFF0	NM_001099047.1
C-	FAM89A.1	89	44	-46	-2.76923	6.42076	4.55231	-3.85068	-3.16693	-3.85068e-06	-3.16693	-2.83018	0.00465221	0.0451076	74	4.96371	FAM89A	FAM89A #0000A7,#FFFFF0	NM_001101257.1
C-	CPEB3.1	77	52	-42.25	-2.76042	5.21604	4.16636	-3.52843	-3.20378	-3.52843e-06	-3.20378	-2.72011	0.00652607	0.0591566	95	6.37233	CPEB3	CPEB3 #0000A7,#FFFFF0	XM_875092.4
C-	MOGAT1.1	96	62	-46.75	-2.50806	8.37055	4.97112	-4.3205	-3.2104	-4.3205e-06	-3.2104	-2.93688	0.0033153	0.0347306	62	4.15878	MOGAT1	MOGAT1 #0000A7,#FFFFF0	NM_001001153.2
C-	TMTC1.1	51	39	-28.25	-2.85246	4.1016	2.86592	-2.50808	-3.31139	-2.50808e-06	-3.31139	-2.31915	0.0203869	0.13614	59	3.95755	TMTC1	TMTC1 #0000A7,#FFFFF0	XM_612516.5
C-	RPL36A (NC_007313 53425238..53434683).1	72	50	-40.25	-2.91667	5.06559	4.4992	-3.31001	-3.32516	-3.31001e-06	-3.32516	-2.66791	0.00763258	0.066299	72	4.82955	RPL36A (NC_007313 53425238..53434683)	RPL36A (NC_007313 53425238..53434683) #0000A7,#FFFFF0	XM_864189.4
C-	GSDMA.1	45	32	-23.5	-3	4.34174	2.19177	-2.07715	-3.3765	-2.07715e-06	-3.3765	-2.12407	0.033664	0.195393	51	3.42093	GSDMA	GSDMA #0000A6,#FFFFF0	NM_001078090.1
C-	CACNB2.1	51	18	-21.75	-2.85106	3.44364	2.21	-1.88466	-3.38813	-1.88466e-06	-3.38813	-2.02552	0.0428143	0.231371	59	3.95755	CACNB2	CACNB2 #0000A6,#FFFFF0	NM_175789.2
C-	MEIS3.1	816	270	-333.75	-2.85675	54.7199	23.052	-28.5368	-3.41215	-2.85368e-05	-3.41215	-3.33317	0.000858624	0.0116957	462	30.9896	MEIS3	MEIS3 #0000A6,#FFFFF0	XM_869544.4
C-	NDST3.1	83	49	-50.5	-3.08247	7.81297	4.44471	-4.38698	-3.4228	-4.38698e-06	-3.4228	-3.10044	0.00193232	0.0226789	78	5.23202	NDST3	NDST3 #0000A6,#FFFFF0	NM_001077961.1
C-	CTSK.1	7880	1658	-3116.75	-2.88437	511.352	273.28	-267.557	-3.44153	-0.000267557	-3.44153	-3.27341	0.00106259	0.0138928	8808	590.815	CTSK	CTSK #0000A6,#FFFFF0	NM_001034435.1
C-	TARSL2.1	71	52	-40	-2.83908	5.92629	3.90732	-3.45477	-3.47859	-3.45477e-06	-3.47859	-2.76549	0.00568378	0.0529726	79	5.29909	TARSL2	TARSL2 #0000A6,#FFFFF0	NM_001102089.1
C-	C8H9orf21.1	45	21	-22	-3.31579	3.16326	2.0218	-1.80396	-3.50943	-1.80396e-06	-3.50943	-2.00387	0.0450837	0.240896	52	3.48801	C8H9orf21	C8H9orf21 #0000A6,#FFFFF0	NM_001076436.1
C-	SRGAP1.1	86	69	-70	-3.01439	8.86426	5.9208	-6.16118	-3.5255	-6.16118e-06	-3.5255	-3.70855	0.000208452	0.00373051	116	7.78095	SRGAP1	SRGAP1 #0000A6,#FFFFF0	XM_587244.4
C-	LOC781785.1	66	43	-25.25	-2.60317	4.68693	2.9127	-2.25725	-3.57097	-2.25725e-06	-3.57097	-2.25354	0.0242251	0.154153	53	3.55509	LOC781785	LOC781785 #0000A6,#FFFFF0	XM_001250280.1
C-	CD300E.1	47	24	-18	-2.8	3.18105	2.82408	-1.6927	-3.70602	-1.6927e-06	-3.70602	-1.97314	0.0484792	0.253208	13	0.872003	CD300E	CD300E #0000A6,#FFFFF0	XM_603093.3
C-	SCN3A.2	44	28	-27.75	-2.94737	4.00294	3.13846	-2.59077	-3.78471	-2.59077e-06	-3.78471	-2.45588	0.014054	0.104849	45	3.01847	SCN3A	SCN3A #0000A6,#FFFFF0	XM_002703611.1
C-	SH3BGRL.1	1059	483	-437.75	-3.17246	94.1789	32.9717	-38.1267	-3.79438	-3.81267e-05	-3.79438	-2.14378	0.0320508	0.188984	685	45.9478	SH3BGRL	SH3BGRL #0000A6,#FFFFF0	NM_001035440.1
C-	BBS9.4	133	102	-79.75	-3.24648	10.3241	8.39458	-6.90358	-3.79941	-6.90358e-06	-3.79941	-3.31289	0.000923363	0.0123771	145	9.72618	BBS9	BBS9 #0000A6,#FFFFF0	XM_615460.5
C-	SEMA6A.1	172	117	-100	-3.31214	13.078	10.846	-8.81503	-3.82699	-8.81503e-06	-3.82699	-3.50654	0.000453971	0.00695848	73	4.89663	SEMA6A	SEMA6A #0000A6,#FFFFF0	XM_873210.2
C-	C27H8ORF79.1	57	46	-36.5	-3.21212	5.10035	3.46021	-3.1688	-3.83031	-3.1688e-06	-3.83031	-2.72526	0.00642509	0.0586097	64	4.29294	C27H8ORF79	C27H8ORF79 #0000A6,#FFFFF0	NM_001076832.1
C-	LOC507891.1	46	30	-21.5	-3.45714	4.29478	1.76135	-1.83387	-3.8359	-1.83387e-06	-3.8359	-2.07406	0.0380738	0.212403	39	2.61601	LOC507891	LOC507891 #0000A6,#FFFFF0	XM_584582.4
C-	LOC100138045.1	95	48	-38.5	-3.08108	6.33917	5.40893	-3.36653	-3.8485	-3.36653e-06	-3.8485	-2.32298	0.0201801	0.135206	103	6.90894	LOC100138045	LOC100138045 #0000A6,#FFFFF0	XM_001787272.1
C-	WDR52.1	131	25	-47.25	-3.625	8.75696	2.73394	-3.70553	-3.85602	-3.70553e-06	-3.85602	-2.22519	0.0260687	0.162737	143	9.59203	WDR52	WDR52 #0000A6,#FFFFF0	XM_591373.4
C-	WDR87.1	52	28	-22.75	-3.275	3.51933	2.58077	-1.94585	-3.87021	-1.94585e-06	-3.87021	-2.14175	0.0322138	0.189782	58	3.89047	WDR87	WDR87 #0000A6,#FFFFF0	XM_586844.5
C-	DCAF6.2	362	194	-182.25	-2.6382	32.0422	14.6689	-17.4998	-3.87603	-1.74998e-05	-3.87603	-3.59817	0.000320464	0.00528882	284	19.0499	DCAF6	DCAF6 #0000A6,#FFFFF0	XM_001254027.2
C-	LOC787097.1	187	98	-92.5	-3.3871	12.3132	9.83825	-7.71567	-3.92673	-7.71567e-06	-3.92673	-3.82668	0.000129887	0.00254319	214	14.3545	LOC787097	LOC787097 #0000A6,#FFFFF0	XM_001254593.2
C-	FAT4.1	101	59	-50	-3.46914	6.80318	5.20089	-4.31295	-3.98626	-4.31295e-06	-3.98626	-3.05886	0.00222181	0.0253973	111	7.44556	FAT4	FAT4 #0000A5,#FFFFF0	XM_001249785.2
C-	GNAI1.1	139	121	-89.25	-3.27389	11.5069	8.53088	-7.75216	-3.99892	-7.75216e-06	-3.99892	-3.9225	8.76354e-05	0.00182451	166	11.1348	GNAI1	GNAI1 #0000A5,#FFFFF0	NM_174324.2
C-	ATRX.2	1505	853	-719	-3.25392	133.583	58.656	-62.9962	-4.06278	-6.29962e-05	-4.06278	-2.99656	0.00273044	0.0298265	1360	91.2249	ATRX	ATRX #0000A5,#FFFFF0	XM_592333.5
C-	BMP4.1	39	33	-22.5	-3.64706	2.75388	2.23909	-1.83097	-4.16216	-1.83097e-06	-4.16216	-2.1181	0.0341664	0.197231	42	2.81724	BMP4	BMP4 #0000A5,#FFFFF0	NM_001045877.1
C-	ILDR2.1	62	28	-24.25	-3.36585	4.08807	2.73187	-2.08541	-4.21507	-2.08541e-06	-4.21507	-2.26773	0.0233457	0.150424	64	4.29294	ILDR2	ILDR2 #0000A5,#FFFFF0	NM_001102073.1
C-	METTL7A (NC_007303 31901375..31912673).1	113	36	-47	-3.50667	10.1328	2.42151	-4.1043	-4.23906	-4.1043e-06	-4.23906	-2.12995	0.0331757	0.193583	61	4.0917	METTL7A (NC_007303 31901375..31912673)	METTL7A (NC_007303 31901375..31912673) #0000A5,#FFFFF0	XM_001249762.3
C-	C1QA.1	378	184	-195.25	-3.6931	27.6595	19.2325	-16.5179	-4.31719	-1.65179e-05	-4.31719	-4.52949	5.91286e-06	0.00017842	256	17.1717	C1QA	C1QA #0000A5,#FFFFF0	NM_001014945.1
C-	CAMK1.1	106	59	-56.5	-3.97368	7.4825	5.68194	-4.61014	-4.42695	-4.61014e-06	-4.42695	-3.41243	0.000643864	0.00926421	124	8.31756	CAMK1	CAMK1 #0000A5,#FFFFF0	NM_001076868.1
C-	SCN3A.3	33	24	-25.25	-3.65789	3.82895	2.33573	-2.27184	-4.43899	-2.27184e-06	-4.43899	-2.39704	0.0165279	0.117029	31	2.07939	SCN3A	SCN3A #0000A5,#FFFFF0	XM_613914.5
C-	DENND2C.1	46	21	-20.75	-3.67742	4.13199	1.37132	-1.80393	-4.45318	-1.80393e-06	-4.45318	-2.13759	0.0325498	0.191346	30	2.01231	DENND2C	DENND2C #0000A5,#FFFFF0	XM_600557.4
C-	HRH1.1	175	137	-92	-3.40523	18.935	8.84234	-8.56059	-4.49128	-8.56059e-06	-4.49128	-2.31537	0.0205926	0.137196	170	11.4031	HRH1	HRH1 #0000A5,#FFFFF0	NM_174083.3
C-	LOC789257.1	44	31	-26.5	-4.02857	4.78315	2.49728	-2.28931	-4.55954	-2.28931e-06	-4.55954	-2.42136	0.0154624	0.111958	37	2.48185	LOC789257	LOC789257 #0000A4,#FFFFF0	XM_001256058.1
C-	DISC1.1	39	21	-23.5	-4.48148	2.9645	2.17624	-1.93177	-4.60067	-1.93177e-06	-4.60067	-2.22885	0.0258241	0.161698	42	2.81724	DISC1	DISC1 #0000A4,#FFFFF0	XM_001252164.2
C-	LOC100296333.1	33	22	-21.75	-4.22222	2.66171	2.34257	-1.82623	-4.62889	-1.82623e-06	-4.62889	-2.17012	0.0299977	0.180442	26	1.74401	LOC100296333	LOC100296333 #0000A4,#FFFFF0	XM_002700650.1
C-	LOC784768.1	85	48	-34	-4.02222	6.01807	4.23972	-2.7927	-4.7065	-2.7927e-06	-4.7065	-2.05505	0.0398738	0.219747	23	1.54277	LOC784768	LOC784768 #0000A4,#FFFFF0	XM_001252288.2
C-	SNX24.1	1543	573	-636.25	-4.02976	101.025	55.6063	-51.9869	-4.84362	-5.19869e-05	-4.84362	-3.2234	0.00126679	0.016013	1613	108.195	SNX24	SNX24 #0000A4,#FFFFF0	NM_001076311.1
C-	CIDEA.1	43	33	-20.75	-3.96429	2.82859	2.34257	-1.69609	-5.02044	-1.69609e-06	-5.02044	-2.12852	0.0332943	0.193951	46	3.08555	CIDEA	CIDEA #0000A4,#FFFFF0	NM_001083449.1
C-	ABCC5.1	36	20	-20.75	-4.32	2.30872	1.89424	-1.71805	-5.12634	-1.71805e-06	-5.12634	-2.15145	0.031441	0.186511	39	2.61601	ABCC5	ABCC5 #0000A4,#FFFFF0	NM_001077907.1
C-	ARSK.1	62	50	-36.25	-4.53659	5.72379	3.31241	-3.04126	-5.32098	-3.04126e-06	-5.32098	-2.88374	0.00392983	0.0398068	60	4.02463	ARSK	ARSK #0000A3,#FFFFF0	NM_001035400.1
C-	IQCD.1	51	37	-32.25	-4.58333	3.55689	2.69573	-2.64464	-5.40062	-2.64464e-06	-5.40062	-2.69687	0.00699945	0.062191	49	3.28678	IQCD	IQCD #0000A3,#FFFFF0	NM_001075606.1
C-	SCN3A.1	41	33	-33.75	-4.46154	4.54967	3.08598	-2.97381	-5.46746	-2.97381e-06	-5.46746	-2.86649	0.0041505	0.0414783	45	3.01847	SCN3A	SCN3A #0000A3,#FFFFF0	XM_002703609.1
C-	LOC100137897.1	36	14	-18	-5	2.49751	1.33033	-1.45208	-5.56417	-1.45208e-06	-5.56417	-2.00963	0.04447	0.238457	40	2.68308	LOC100137897	LOC100137897 #0000A3,#FFFFF0	XM_001788751.1
C-	SCN3A.4	43	34	-29	-4.41176	4.62257	2.70596	-2.61994	-5.57378	-2.61994e-06	-5.57378	-2.70027	0.00692843	0.0617502	43	2.88432	SCN3A	SCN3A #0000A3,#FFFFF0	XM_002703610.1
C-	CACNA1E.1	31	21	-17.5	-5.66667	3.25507	1.59001	-1.48332	-5.63141	-1.48332e-06	-5.63141	-2.03564	0.0417861	0.227307	18	1.20739	CACNA1E	CACNA1E #0000A3,#FFFFF0	XM_001249409.2
C-	PLOD2.1	251	158	-175.75	-5.9507	20.1481	15.6514	-14.3682	-5.95045	-1.43682e-05	-5.95045	-5.16046	2.46351e-07	1.07876e-05	261	17.5071	PLOD2	PLOD2 #0000A2,#FFFFF0	NM_001101149.1
C-	CA8.1	52	40	-33.25	-5.43333	3.5022	2.83934	-2.6931	-6.06235	-2.6931e-06	-6.06235	-2.7788	0.00545596	0.0512754	57	3.8234	CA8	CA8 #0000A2,#FFFFF0	NM_001083690.1
C-	SYCP3.1	203	175	-103.75	-5.06863	17.9909	11.7481	-8.42013	-6.18726	-8.42013e-06	-6.18726	-2.29338	0.021826	0.142867	201	13.4825	SYCP3	SYCP3 #0000A2,#FFFFF0	NM_001040588.1
C-	LAP.1	48	17	-24.75	-5.95	3.40891	1.86038	-2.00109	-6.24564	-2.00109e-06	-6.24564	-2.40727	0.0160724	0.11481	24	1.60985	LAP	LAP #0000A2,#FFFFF0	NM_203435.3
C-	ODZ4.1	62	39	-36.25	-5.02778	4.50777	4.21499	-3.08725	-6.37356	-3.08725e-06	-6.37356	-2.99992	0.00270056	0.0296123	45	3.01847	ODZ4	ODZ4 #0000A1,#FFFFF0	XM_586751.5
C-	LOC534360.1	98	69	-59.5	-5.0339	7.19627	5.97892	-5.10526	-6.43103	-5.10526e-06	-6.43103	-3.86328	0.000111874	0.00223604	104	6.97602	LOC534360	LOC534360 #0000A1,#FFFFF0	XM_614108.5
C-	LOC531699.1	29	22	-18.25	-5.29412	2.30775	1.8741	-1.55611	-6.67154	-1.55611e-06	-6.67154	-2.14516	0.0319401	0.188566	19	1.27447	LOC531699	LOC531699 #0000A1,#FFFFF0	XM_610199.4
C-	LOC788835.1	684	489	-354.25	-7.24229	71.8909	33.754	-31.952	-9.8819	-3.1952e-05	-9.8819	-2.25516	0.0241233	0.153766	562	37.6973	LOC788835	LOC788835 #00009C,#FFFFF0	XM_001789147.1
C-	NCAM2.1	38	24	-21.5	-8.16667	2.54893	2.27261	-1.8215	-10.4996	-1.8215e-06	-10.4996	-2.45333	0.014154	0.105395	38	2.54893	NCAM2	NCAM2 #00009B,#FFFFF0	XM_615721.4
C-	CPA3.1	37	19	-18.5	-15.8	2.48185	1.68643	-1.38188	-11.7927	-1.38188e-06	-11.7927	-2.15948	0.0308129	0.18376	37	2.48185	CPA3	CPA3 #000099,#FFFFF0	XM_606877.3
C-	RBMX (NC_007331 10300714..10307771).2	27	26	-15	-7.66667	2.39651	1.74401	-1.35075	-13.9403	-1.35075e-06	-13.9403	-2.16327	0.0305203	0.182498	26	1.74401	RBMX (NC_007331 10300714..10307771)	RBMX (NC_007331 10300714..10307771) #000095,#FFFFF0	XM_002707127.1
C-	LOC786625.1	29	24	-15.75	-13.6	2.62505	2.01328	-1.30753	-14.2846	-1.30753e-06	-14.2846	-2.13208	0.0330006	0.192985	14	0.93908	LOC786625	LOC786625 #000094,#FFFFF0	XM_001254256.1
C-	PLVAP.1	33	17	-18	-11.2857	2.21354	1.54399	-1.47421	-14.6994	-1.47421e-06	-14.6994	-2.2684	0.0233049	0.150258	33	2.21354	PLVAP	PLVAP #000094,#FFFFF0	NM_001035353.1
C-	LAMA3.1	90	48	-39.5	-13.1538	6.0328	5.18176	-3.19286	-15.3859	-3.19286e-06	-15.3859	-2.26624	0.023437	0.150693	91	6.10402	LAMA3	LAMA3 #000093,#FFFFF0	XM_612197.4
C-	CCL14.1	50	9	-18	-15.4	3.35386	0.842589	-1.34882	-16.0126	-1.34882e-06	-16.0126	-2.04066	0.0412845	0.225307	50	3.35386	CCL14	CCL14 #000092,#FFFFF0	NM_001046585.1
C-	SLC7A8.1	114	79	-77.5	-16.5	8.09643	7.30859	-6.32362	-17.3322	-6.32362e-06	-17.3322	-4.74711	2.06352e-06	7.18036e-05	66	4.42709	SLC7A8	SLC7A8 #00008F,#FFFFF0	XM_616962.3
C-	LOC514978.1	45	23	-23.25	-14.2857	3.99419	1.68279	-1.90141	-18.2108	-1.90141e-06	-18.2108	-2.61033	0.00904539	0.0755761	23	1.54277	LOC514978	LOC514978 #00008E,#FFFFF0	XM_592903.3
C-	VCAM1 (NC_007301 45505000..45527552).1	38	24	-19	-16.2	2.54893	2.52005	-1.58209	-18.7709	-1.58209e-06	-18.7709	-2.385	0.0170794	0.119799	38	2.54893	VCAM1 (NC_007301 45505000..45527552)	VCAM1 (NC_007301 45505000..45527552) #00008D,#FFFFF0	NM_174484.1
C-	KDM6A.3	395	192	-153.75	-13.551	26.4913	16.9872	-12.147	-19.9952	-1.2147e-05	-19.9952	-2.10858	0.0349808	0.200956	396	26.5625	KDM6A	KDM6A #00008B,#FFFFF0	XM_002707355.1
C-	CD209.1	122	114	-107.75	-21.5238	10.8968	10.4364	-8.93283	-22.5655	-8.93283e-06	-22.5655	-5.71831	1.07595e-08	6.56198e-07	122	8.18341	CD209	CD209 #000087,#FFFFF0	NM_001145756.1
C-	CLEC4G.1	350	195	-185.75	-19.122	24.8988	17.5011	-15.312	-22.9793	-1.5312e-05	-22.9793	-3.62466	0.000289348	0.00488945	75	5.03078	CLEC4G	CLEC4G #000086,#FFFFF0	XM_583924.4
C-	UGT1A6.1	28	15	-13.5	-19	1.87816	1.59128	-1.076	-23.0475	-1.076e-06	-23.0475	-1.98647	0.0469813	0.247369	28	1.87816	UGT1A6	UGT1A6 #000086,#FFFFF0	NM_174762.1
C-	LOC781726.1	38	33	-28.75	-29.75	3.01783	2.63464	-2.36265	-38.3432	-2.36265e-06	-38.3432	-2.99503	0.00274418	0.0299442	25	1.67693	LOC781726	LOC781726 #00006D,#FFFFF0	XM_001249699.2
C-	CXCL13.1	28	18	-14.5	-59	1.87816	1.59767	-1.10921	-70.0683	-1.10921e-06	-70.0683	-2.07653	0.037845	0.21198	28	1.87816	CXCL13	CXCL13 #00004D,#FFFFF0	NM_001015576.2

## Sheet: list
295+ or C+	373- or C-
ACOT7	AAK1
ADAR	ABCC5
AGRN	ACAD10
ALAS1	ACRC
AMIGO3	ADD3
ANKRD33	ADORA3
APBB2	AGL
APRT	AGPHD1
ARHGEF16	AGTPBP1
ASPDH	AKAP5
ATG4D	AKT3
BAK1	ALDH7A1
BATF	ALG13
BAX (NC_007316 55542775..55547025)	ALMS1
BCL2	ALS2CR13
BCL2L12	ANKRD26
BCL6	ANKRD32 (NC_007305 95157520..95198113)
BCS1L	ANKRD50
BOLA3	AP1S2
BRI3BP	APAF1
BRP44	APOE
C10H11ORF46	APPL1
C1QBP	AQP9
C2	ARHGAP19
CA4	ARHGEF10L
CARS	ARHGEF12
CASP1	ARID4A
CCDC102A	ARMC2
CCDC86	ARMCX3
CCL3	ARRDC3
CCM2	ARSK
CCNB2	ASAP2
CCND2	ATRX
CCT5	B4GALT6
CD300LF	BBS9
CD97	BCL2L2
CDC20	BMP4
CDC25A	BMPR2
CDCA8	BPTF
CDCP1	BRWD1
CDK1	BSPRY
CDKN1C	C1QA
CDT1	C1QC
CENPN (NC_007316 6753458..6772985)	C23H6orf145
CENPT	C27H8ORF79
CEP55	C6H4orf34
CHAF1A	C7
CHAF1B	C8H9orf21
CHCHD4	CA8
CHGA	CACNA1E
CHST11	CACNB2
CHTF18	CALD1
CIRH1A	CAMK1
CKB	CAPRIN2
CKS1B	CCDC112
CLCN3	CCDC125
CLDND1	CCDC15
CMPK2	CCDC18
COX7A1	CCDC23
CPT1C	CCDC66
CSF1	CCDC77
CTGF	CCDC84 (NC_007313 28207254..28215489)
CTPS	CCDC88A
CTU1	CCL14
CXCR3	CCL16
CXCR5	CCNI
CYP1B1	CD1A
DCTPP1	CD209
DDX19B	CD300E
DHRS1	CD302
DLL1	CD68
DNPEP	CDC42BPA (NC_007314 27009806..27302801)
DOCK6	CDK14
DTYMK	CEP97
DUSP4	CIDEA
EDN1	CLEC4G
EIF2AK2	CNNM2
EPS8	CPA3
ERLEC1	CPEB3
ESCO2	CRLS1
ESPL1	CRTAM
ETV3L	CRTAP
EXOSC4	CSGALNACT2
F2RL1	CTSK
FADD	CXCL13
FAM54A	CYB5A
FARSA	CYP2U1
FFAR2	CYP4V2
FLT3	DBN1
FLT3LG	DCAF6
FUT4	DECR1
GADD45G	DEFB7
GJA4	DENND2C
GPD2	DHX40
GPR120	DISC1
GPR31	DMTF1
GRAMD1A	DNAH7
GRAMD3	EBI2
GRHPR	EEPD1
GRWD1	EFCAB7
GSDMD	EFHA2
GUK1	EFNA1
GZMB (NC_007319 34983137..34986882)	EMILIN2
HES4	ENAH
HES6	EPB41L2
HJURP	EPS15
HLA-A	EVI5
HMGA1	FAIM
HMGCS1 (NC_007318 33427291..33453264)	FAM115A
HSP90AB1	FAM125B
HSPH1	FAM129A
IFI16	FAM45A
IFI35	FAM89A
IFI44	FARP1
IFIT2	FAT4
IFITM3	FBXL20
IFNG	FBXO44
IFRD2	FMO5
IGFBP3	FRMD6
IKZF4	FUCA2
IL13	GALM
IL18BP	GEN1
IL1F7	GNAI1
IL1RL1	GPM6A
IL22	GPR137B
INHBA	GPR177
INTS5	GPSM2
IRF4	GSDMA
ITGB3	GXYLT1
JAG1	HECA
KCP	HNMT
KIF15	HRH1
KIF18B	HRSP12 (NC_007312 64358647..64367082)
KIF20A	HTR3E
KIF4A	HVCN1
KLF5	IDH1
KNTC1	IFT80
LAG3	IGF2BP3
LAX1	IL7R
LGALS3BP	IL8RB (NC_007300 110592309..110594255)
LGALS9	ILDR2
LIF	IMPACT (NC_007325 33480798..33484453)
LOC100139209	INSR
LOC100335333	IPMK
LOC100335358	IQCD
LOC100335381	ITCH
LOC100336106	KCTD7
LOC100336125	KDM6A
LOC509113	KLF7
LOC512149	KPNA5
LOC513032	KRBA2
LOC515676	LACTB (NC_007308 47246248..47264377)
LOC515679	LAMA3
LOC515736	LAP
LOC515917	LFNG
LOC516658	LIN54
LOC521214	LOC100137897
LOC526769	LOC100138045
LOC529196	LOC100140518
LOC530929	LOC100270756
LOC531049	LOC100296333
LOC616035	LOC100298796
LOC617696	LOC100335220
LOC784535	LOC100335334
LOC786194	LOC100335379
LOC786204	LOC505349
LOC786362	LOC507891
LOC788846	LOC508335
LOC789183	LOC511229
LPIN2	LOC511583
LTBP2	LOC514916
LY6E	LOC514978
MCM10	LOC516512
MCM2 (NC_007320 61869238..61885529)	LOC521172
MED12L	LOC521270
MELK	LOC527796
METTL1	LOC531699
MFSD2A	LOC532798
MGC127492	LOC534295
MGC137708	LOC534360
MMP13	LOC537017
MPP7	LOC540312
MRPL16	LOC574091
MRPL2	LOC613929
MT3	LOC615768
MTP18	LOC615982
MX2	LOC616956
MYBBP1A	LOC617386
MYBL1	LOC617781
MYBL2	LOC781439
MYO10 (NC_007318 59685413..59876548)	LOC781726
NACAD	LOC781785
NAV3	LOC782355
NCF4	LOC782402
NCLN	LOC783944
NFKB2	LOC784768
NFKBIB	LOC785309
NOC4L	LOC785366
NOL6	LOC786625
NTN1	LOC787097
NUSAP1	LOC788312
OAS1 (NC_007315 64590633..64597337)	LOC788835
OAS1 (NC_007315 64606768..64614852)	LOC789257
ORC1L	LOC789338
P2RX7	LOXL3
P2RY14	LRP12
PDE1B	LSR
PHB	LTBP1 (NC_007309 16294657..16518047)
PIGC	LTBP1 (NC_007309 16734394..16778599)
PIM2	MAGEF1
PLEKHN1	MAGI3
PML	MANBA
PPIF	MAP2K6
PPP1R3D	MBTD1
PPP5C	MEF2A
PRF1	MEIS3
PRMT1	METTL7A (NC_007303 31901375..31912673)
PROKR1	MFSD11
PROKR2	MGC152321
PSMB2	MGC159500
PSMB5	MOGAT1
PSMF1	MOSPD2
PTPRO	MPZL3
PTPRR (NC_007303 46107983..46357305)	MYO5A
PYCR1	N4BP2
RAB20	NAA16
RAD54L	NAALADL1
RAMP3	NAGA
RBCK1	NBEAL1
RBP4	NCAM2
RDH13	NDRG3
REC8	NDST3
RECQL4	NPR2
RELB	ODZ4
RHBDF1	OGT
RHBDF2	OMG
RPP21	OSBPL11
RRAS	OSBPL6
RSAD2	OSBPL8
RUSC2	PAK1
RUVBL2	PCYOX1
SAA1	PDK1
SAMD9	PDZK1
SBNO2	PGM2L1
SCN9A	PHOSPHO2
SDHAF2	PICALM
SECTM1 (NC_007317 51930106..51933664)	PIK3C2A
SF3B4	PIKFYVE
SH2D4A	PKD1L3
SLC17A9	PLA2G4A
SLC19A1	PLA2G7
SLC29A1	PLEKHA5
SLC6A9 (NC_007301 108919381..108939713)	PLOD2
SLC7A5	PLVAP
SLCO4A1	PPAP2A
SLFN11	PRKD3
SOBP	PRKRA
SPADH1	PSIP1
SPAG5	PTPLA
SPC24	QKI
STAT5A	RAB18
STIP1 (NC_007330 44288540..44301331)	RALGAPA2
SUV420H2	RBL1
SYNJ2	RBL2
TAPBP	RBMX (NC_007331 10300714..10307771)
TBRG4	RCOR3
TGM2	REEP5
TH	REV3L
THOP1	RIT1
TINAGL1	RNF130
TM6SF2	RNPC3
TMEM170B	RPL36A (NC_007313 53425238..53434683)
TMEM40	RRM2B
TNFAIP2 (NC_007319 68062503..68075109)	RUFY2
TNFRSF12A	S100B
TNFRSF18	SALL2
TNFRSF25	SAP30
TNFRSF4	SCG5
TNFSF14	SCN3A
TRAF2	SDCCAG8
TRAF4	SEL1L3
TREX1	SEMA6A
TRIM25	SEPSECS
TRMT61A	SFRS18
TRPV4	SFT2D2
TUBA1B (NC_007303 33745419..33749261)	SGCB
UBC	SGOL2
UBE2C	SH3BGRL
UHRF1	SLC31A1
USP18	SLC35A5
VARS	SLC38A9
ZMIZ2	SLC7A8
ZNF382	SMARCA2
ZNF593	SMARCD3
ZNFX1	SMC4
	SMC5
	SMOX
	SNAI1
	SNX18
	SNX2
	SNX24
	SNX5
	SPG20
	SRGAP1
	SRPK2
	SSBP2
	ST3GAL6
	ST7L
	STK17B
	STMN1
	STX12
	SYCP3
	TARSL2
	TBC1D9B
	TDRD6
	TET2
	TGDS
	TH1L
	THUMPD2
	TIE1
	TIMP2
	TLR6
	TLR7
	TMEM106B
	TMEM145
	TMEM156
	TMEM184C
	TMEM67
	TMEM71
	TMTC1
	TMTC3
	TMTC4
	TPD52
	TRIM2
	TRPC1
	TSC1
	UBN2
	UGT1A6
	USP28
	UTRN
	VCAM1 (NC_007301 45505000..45527552)
	VCL
	VEGFA
	VPS13C
	WDR19
	WDR52
	WDR87
	XPR1
	ZBED5
	ZFP14
	ZFP2
	ZFP30
	ZFP62
	ZMYM2
	ZMYM6
	ZNF10
	ZNF12
	ZNF175
	ZNF187
	ZNF248
	ZNF283
	ZNF345
	ZNF382
	ZNF420
	ZNF432
	ZNF454
	ZNF518A
	ZNF527
	ZNF529
	ZNF547
	ZNF572
	ZNF624
	ZPBP2
